# Supplementary material for: Modified Delphi survey for the evidence summarisation of patient decision aids: Study protocol
Source: PubMed Central journal article supplement — BMJ Open. 2019 Mar 23;9(3):e026701. doi: 10.1136/bmjopen-2018-026701 (PMC6475258; doi:10.1136/bmjopen-2018-026701), 2019-03-23
Supplement: bmjopen-2018-026701.draft_revisions.pdf [file bmjopen-2018-026701.draft_revisions.pdf]

# BMJ Open

BMJ Open is committed to open peer review. As part of this commitment we make the peer review history of every article we publish publicly available.

When an article is published we post the peer reviewers' comments and the authors' responses online. We also post the versions of the paper that were used during peer review. These are the versions that the peer review comments apply to.

The versions of the paper that follow are the versions that were submitted during the peer review process. They are not the versions of record or the final published versions. They should not be cited or distributed as the published version of this manuscript.

BMJ Open is an open access journal and the full, final, typeset and author-corrected version of record of the manuscript is available on our site with no access controls, subscription charges or pay-per-view fees (<http://bmjopen.bmj.com>).

If you have any questions on BMJ Open's open peer review process please email [editorial.bmjopen@bmj.com](mailto:editorial.bmjopen@bmj.com)

# BMJ Open

## Study protocol: A modified Delphi survey for the evidence summarization of patient decision aids

|                               |                                                                                                                                                                                                                                                                                                                                                                                                                                                                                                                                                                                                                                                                                                                       |
|-------------------------------|-----------------------------------------------------------------------------------------------------------------------------------------------------------------------------------------------------------------------------------------------------------------------------------------------------------------------------------------------------------------------------------------------------------------------------------------------------------------------------------------------------------------------------------------------------------------------------------------------------------------------------------------------------------------------------------------------------------------------|
| Journal:                      | <i>BMJ Open</i>                                                                                                                                                                                                                                                                                                                                                                                                                                                                                                                                                                                                                                                                                                       |
| Manuscript ID                 | bmjopen-2018-026701                                                                                                                                                                                                                                                                                                                                                                                                                                                                                                                                                                                                                                                                                                   |
| Article Type:                 | Protocol                                                                                                                                                                                                                                                                                                                                                                                                                                                                                                                                                                                                                                                                                                              |
| Date Submitted by the Author: | 24-Sep-2018                                                                                                                                                                                                                                                                                                                                                                                                                                                                                                                                                                                                                                                                                                           |
| Complete List of Authors:     | Durand, Marie-Anne; The Dartmouth Institute for Health Policy & Clinical Practice,<br>Dannenberg, Michelle; Dartmouth College, The Dartmouth Institute for Health Policy and Clinical Practice<br>Saunders, Catherine; Dartmouth College, The Dartmouth Institute for Health Policy & Clinical Practice<br>Giguère, Anik; Université Laval Faculté de médecine<br>Alper, Brian; EBSCO Health, DynaMed Plus; University of Missouri<br>Columbia School of Medicine, Family and Community Medicine<br>Hoffman, Tammy; Bond University,<br>Perestelo-Pérez, L; Evaluation Unit of the Canary Islands Health Service<br>Campbell, Stephen; Dartmouth College Geisel School of Medicine<br>Elwyn, Glyn; Dartmouth College, |
| Keywords:                     | Decision Making, Delphi Technique, Patient Preference, Patient-Centered Care, Surveys and Questionnaires                                                                                                                                                                                                                                                                                                                                                                                                                                                                                                                                                                                                              |
|                               |                                                                                                                                                                                                                                                                                                                                                                                                                                                                                                                                                                                                                                                                                                                       |

SCHOLARONE™  
Manuscripts

Only

## Study protocol: A modified Delphi survey for the evidence summarization of patient decision aids

Running heading: Evidence summarization Delphi survey

### Authors:

Marie-Anne Durand<sup>1</sup>  
 Michelle D. Dannenberg<sup>2</sup>  
 Catherine H. Saunders<sup>3</sup>  
 Anik Giguère<sup>4</sup>  
 Brian S. Alper<sup>5</sup>  
 Tammy Hoffmann<sup>6</sup>  
 Lilisbeth Perestelo-Perez<sup>7</sup>  
 Stephen T. Campbell<sup>8</sup>  
 Glyn Elwyn<sup>9</sup>

- 1 Associate Professor  
 The Preference Laboratory  
 The Dartmouth Institute for Health Policy & Clinical Practice  
 One Medical Center Drive, Lebanon, NH 03766, United States
- 2 Research Assistant/Research Coordinator  
 The Preference Laboratory  
 The Dartmouth Institute for Health Policy & Clinical Practice  
 One Medical Center Drive, Lebanon, NH 03766, United States
- 3 Doctoral Student  
 The Preference Laboratory  
 The Dartmouth Institute for Health Policy & Clinical Practice  
 One Medical Center Drive, Lebanon, NH 03766, United States
- 4 Associate Professor  
 Department of Family Medicine  
 Université Laval, C.A.  
 2325 Rue de l'Université, Québec, QC G1V 0A6, Canada
- 5 Vice President of Innovations and EBM Development  
 EBSCO Health Innovations, Department of Innovations and EBM Development  
 10 Estes Street, Ipswich, MA 01938, United States
- 6 Professor of Clinical Epidemiology  
 Centre for Research in Evidence-Based Practice (CREBP)  
 Faculty of Health Sciences & Medicine  
 Level 2, Building 5, Faculty of Health Sciences & Medicine, Bond University  
 14 University Dr, Robina QLD 4226, Australia
- 7 Researcher  
 Evaluation AND Planning Unit – Directorate of the Canary Islands Health Service  
 Camino de Candelaria s/n. El Chorrillo  
 38109  
 El Rosario, Spain
- 8 Patient Partner  
 The Dartmouth Institute for Health Policy & Clinical Practice  
 One Medical Center Drive, Lebanon, NH 03766, United States

1  
2  
3 9 Professor  
4 The Preference Laboratory  
5 The Dartmouth Institute for Health Policy & Clinical Practice  
6 One Medical Center Drive, Lebanon, NH 03766, United States  
7  
8  
9  
10

11  
12 Correspondence to: Marie-Anne Durand:  
13 Phone: 603-653-0851  
14 Email: [marie-anne.durand@dartmouth.edu](mailto:marie-anne.durand@dartmouth.edu)  
15 Address: The Preference Laboratory  
16 The Dartmouth Institute for Health Policy & Clinical Practice  
17 Level 5, Williamson Translational Research Building  
18 One Medical Center Drive  
19 Lebanon, NH 03756  
20

21  
22 Keywords

23 [Decision Making](#)

24 [Delphi Technique](#)

25 [Patient Preference](#)

26 [Patient-Centered Care](#)

27 [Surveys and Questionnaires](#)  
28  
29  
30  
31  
32  
33  
34  
35  
36  
37  
38  
39  
40  
41  
42  
43  
44  
45  
46  
47  
48  
49  
50  
51  
52  
53  
54  
55  
56  
57  
58  
59  
60

## ABSTRACT FOR PROTOCOL

### Introduction

Information included in a PDA can significantly influence patients' decisions and is, therefore, expected to be evidence based and rigorously selected and summarized. Yet patient decision aid developers have not yet agreed on a standardized process for the selection and summarization of the supporting evidence. We intend to generate consensus on a process (and related steps and criteria) for selecting and summarizing evidence for patient decision aids using a modified Delphi survey.

### Methods and Analysis

We will develop an evidence summarization process specific to PDA development by using a consensus-based Delphi approach, surveying international experts and stakeholders with two to three rounds. To increase generalizability and acceptability, we will distribute the survey to the following stakeholder groups: patient decision aid developers, researchers with expertise in shared decision making, patient decision aid development and evidence summarization, members of the International Patient Decision Aid Standards group, policy makers with expertise in patient decision aid certification, and patient stakeholder groups. For each criterion, if at least 80% of survey participants rank the criterion as most important/least important, we will consider consensus achieved.

### Ethics and Dissemination

It is critical for patient decision aids to have accurate and trustworthy evidence-based information about the risks and benefits of health treatments and tests, as these decision aids help patients make important choices. We want to generate consensus on an approach for selecting and summarizing the evidence included in patient decision aids, which can be widely implemented by decision aid developers. Dartmouth College's Committee for the Protection of Human Subjects approved this protocol. We will publish our results in a peer-reviewed journal.

Words: 265

### Article Summary

- Gap: There is no standardized method for selecting and summarizing the evidence in patient decision aids.
- Solution: We're developing a process to ensure patient decision aids have the most up-to-date, trustworthy evidence available.
- Clinical implications: This will help patients and clinicians know they can trust the information in patient decision aids, so they can make the best decisions together.
- Health systems implications: Knowing that the evidence selection and summarization process is rigorous, healthcare systems may feel more comfortable including patient decision aids in routine care.
- Strengths: Systematic involvement of patient stakeholders.
- Limitations: Limitations of online surveys include selection bias.

## INTRODUCTION

Patient Decision Aids (PDAs) are tools that help patients and their clinicians make preference-sensitive decisions together. They provide information about the harms and benefits of reasonable health-care options and help patients compare options and clarify their values and preferences. They promote patient engagement in medical decision making, collaboration between patients and their care team, increase knowledge and align patients' choices with their preferences [1]. Therefore, the information included in PDAs can significantly impact patients' decisions. For this reason, patients and clinicians expect the information in PDAs to be evidence based and rigorously selected and summarized.

1  
2 The approach that PDA developers use to select and summarize the evidence in PDAs, however, appears  
3 inconsistent. A recent international cross sectional survey of 15 PDA developers confirms that they do not have  
4 an agreed-upon, standardized process to select and summarize evidence. They also do not always document the  
5 evidence selection and summarization process [2]. Most organizations reported using existing systematic  
6 reviews and clinical practice guidelines to select and summarize information for PDAs. Less than half reported  
7 using a standard, documented approach to guide the evidence selection and summarization. When the  
8 approach was documented, the documents offered varying levels of detail. Common evidence summarization  
9 steps identified were: tool-relevant question formation, search strategies, evidence appraisals, and updating  
10 policies. There was no standardized process across organizations to summarize evidence for PDAs. Although  
11 agreed-upon approaches and tested methods for evidence summarization exist in other areas, such as clinical  
12 practice guidelines, there is no agreed process (including steps and criteria within each step) for the selection  
13 and summarization of evidence for PDAs.  
14  
15

16 The International Patient Decision Aids Standards (IPDAS) collaboration developed criteria for assessing the  
17 quality of PDAs [3]. These criteria are also used by PDA producers to guide the development of the  
18 interventions. However, only six items of the IPDAS checklist cover the selection and synthesis of evidence, and  
19 do not provide any guidance about recommended methods for the evidence selection and summarization of  
20 PDAs [3]. Further, the IPDAS instrument and the IPDAS minimum standards do not offer additional information  
21 or guidance on the steps required to select and summarize evidence-based information for PDAs [4, 5]. Other  
22 efforts to evaluate or certify the quality of PDAs have emerged [6], but none of those standards or certification  
23 bodies describe recommended methods and criteria that PDAs producers should follow when selecting and  
24 summarizing evidence for patient-facing interventions.  
25  
26

27 Evidence synthesis in other medical contexts is increasingly standardized, such as the selection and  
28 summarization of evidence for clinical practice guidelines and systematic reviews. This process minimizes the  
29 risk of bias in the end product [7-16]. The same level of scrutiny is justified when developing PDAs, as they may  
30 directly influence patient care and decision making. Tasks such as the selection and identification of patient-  
31 relevant outcomes, analysis of patient concerns and priorities, description of the quality of evidence, and  
32 communication of uncertainty in ways that patients understand warrants the development of an agreed process  
33 and related steps and criteria that are specific to PDAs. Efforts to develop an agreed evidence summarization  
34 process for PDAs should incorporate the substantial body of related evidence summarization guidance  
35 previously developed by other groups, and notably for clinical practice guidelines [9].  
36  
37

### 38 **Objective**

39 The purpose of the study is to generate consensus on a process (and related steps and criteria) for selecting and  
40 summarizing evidence for patient decision aids using a modified Delphi survey.  
41  
42  
43  
44

## 45 **2 METHODS**

### 46 **Study Design and Procedures**

47 We will develop an evidence summarization process specific to PDA development by using a consensus-based  
48 Delphi approach previously used in the development of a quality criteria framework for PDAs [17, 18].  
49 Consensus methods can harness the views of international experts on a wide range of information and  
50 questions in order to make decisions that are based on expert consensus [19]. We will conduct a multi-round  
51 modified Delphi survey (two to three rounds). Compared to the nominal group technique, it is the most practical  
52 and scalable method to obtain feedback from a large number of stakeholders in different geographic locations.  
53 During the multiple rounds of online questionnaires, relevant stakeholders will be consulted to provide feedback  
54 about the evolving set of evidence summarization steps and criteria. The anonymous responses from  
55  
56  
57  
58  
59

1 participants will be fed back to them in subsequent rounds. Depending on the level of consensus after two  
2 rounds (see Data Analysis section), we will determine whether to conduct a third survey round.  
3  
4

### 5 **Study Management**

6 To oversee the tasks of 1) generating an initial set of criteria for the Delphi process and 2) managing the Delphi  
7 survey distribution and analysis, we convened a steering group. This group will oversee the project and will  
8 make strategic decisions about the study design, data collection and analysis processes, as well as agree a final  
9 process and related set of steps and criteria. An invitation to join this group was posted on social media  
10 (Shared@Shared Decision Making Network Facebook group: 745 members) on 30 June 2017. The post invited all  
11 Facebook group members to join an in-person meeting about evidence summarization during the International  
12 Shared Decision Making conference, held in Lyon, France, between July 2, and July 5, 2017. For those who were  
13 not able to join the meeting but expressed an interest in evidence summarization of PDAs, a high-level summary  
14 was posted on Facebook. The steering group was convened in September 2017. The study steering group  
15 includes international experts in PDA development, evaluation and implementation, evidence summarization  
16 and clinical practice guidelines, and patient representation. Google drive will be used to facilitate the exchange  
17 and review of information and documents as well as facilitate real-time collaboration and version-control.  
18  
19

### 20 **Participants**

21 To maximize the generalizability and applicability of the criteria, we plan to invite participation in the survey  
22 from the following groups: 1) all known developers of PDAs who created or updated a tool within last five  
23 calendar years (using existing inventory), 2) all members of the of the IPDAS group, 3) the Shared Decision  
24 Making listserv; 4) the Society for Participatory Medicine listserv ; 5) an overdiagnosis google group ; 6) the  
25 evidence-based healthcare listserv ; 7) the Society for Medical Decision Making ; the 8) the Society of Behavioral  
26 Medicine (Health Decision Making Interest Group) , 9) HTAi-ISG Patient Involvement listserv, 10) GRADE Working  
27 group, 11) the Guidelines International Network, 12) convenience sample of policy makers with interest and  
28 expertise in PDA certification; 13) the BMJ patient group; 14) the ProPublica Patient Safety Community.  
29  
30

31 For all participants, the survey invitation (Supplementary File 1) will provide a brief outline of the study, a link to  
32 the online survey (Supplementary File 2), and a brief participant information sheet as the first page of the  
33 survey. Consent will be inferred by participants' completion of the survey. The ethics application form and  
34 protocol were submitted to Dartmouth College's committee for the protection of human subjects on 27 April  
35 2018. Approval was granted on 23 May 2018 (STUDY00031042).  
36  
37

### 38 **Patient and Public Involvement**

#### 39 **Design**

40 Our patient partner, SC, was involved in the development of the Delphi survey and provided meaningful  
41 feedback on iterative drafts of the online questionnaire. SC is a core member of our study steering group and an  
42 author on this manuscript.  
43  
44

#### 45 **Participants**

46 We also plan to make a concerted effort to recruit patient participants. We will reach out to online patient  
47 groups, including the BMJ Patient group, the ProPublica Patient Safety Community (more than 6,000 members).  
48 We will also engage a patient and family advisor group at Dartmouth-Hitchcock Medical Center.  
49  
50

#### 51 **Analysis**

52 Our patient partner will be a critical part of our analysis team, and will be involved in all steering group  
53 meetings.  
54

### 55 **Survey Development**

1  
2 The main output of the original Lyon evidence summarization meeting was the creation of a spreadsheet that  
3 detailed all evidence-summarization steps inherent to PDA development. The first draft of this spreadsheet,  
4 iteratively developed by the steering group members, included 18 criteria. Combining those 18 criteria with the  
5 eight existing standards for the summarization of clinical practice guidelines as outlined by the National  
6 Academy of Medicine (formerly IOM) & US Preventive Services Task Force Standards led to the creation of the  
7 first draft of the proposed process and steps. This draft was shared in a Google doc with all members of the  
8 steering group and iteratively refined and finalized. Three separate iterations of the process (phases, steps and  
9 criteria) were created, reviewed and discussed by the steering group members until no additional revisions were  
10 suggested. A final internal version of the criteria (n=48), categorized into four phases and 13 steps was finalized  
11 in April 2018 (see Supplementary File 3).  
12

## 13 14 **Data Collection**

### 15 16 **Round One Survey**

17 The round one survey will include a brief information page and a summary of the process that led to the  
18 development of the phases, steps and criteria. Participants will be asked to provide their input on the phases,  
19 steps and criteria (including inclusion, wording, grouping, order and any other comments). Specifically, they will  
20 be asked to indicate using a four-point Likert scale (omit, possible, desirable, essential) whether each criterion  
21 included in the proposed process should be omitted or kept (and whether it is considered possible, desirable or  
22 essential). The criteria will be grouped into relevant phases and steps. For each phase and for each step,  
23 participants will be given the opportunity to provide rewording suggestions, suggest additional phases, steps or  
24 criteria, comment on the order of those elements or provide additional comments, or questions. Email  
25 addresses will be collected so participants can participate in further rounds. At the end of each round, we will  
26 confirm participants' interest to participate in the next round. Participants will also be asked to complete basic  
27 demographic questions. Each round of the survey will be open for three weeks, and two reminders will be sent.  
28  
29

### 30 31 **Round Two Survey (and round three, as necessary)**

32 Round one participants will be invited to complete a second survey, in which feedback will be provided about  
33 the results of the first round (percentage of participants who thought a criterion should be included or excluded)  
34 and about the changes made based on the qualitative feedback. Participants will be invited to indicate whether  
35 to omit or include (omit, possible, desirable, essential) the items, including the new items proposed by  
36 participants in the first round, and to provide additional rewording suggestions, comments, or questions. As  
37 mentioned above, the survey will be open for three weeks, and two email reminders will be sent. Depending on  
38 the level of consensus, a third round may be conducted.  
39

### 40 41 **Data Analysis**

42 Following round one, the ratings will be summarized using percentages. If at least 80% of participants rate the  
43 item in the lower two categories (omit, possible) or in the higher two categories (desirable, essential), we will  
44 consider consensus to be achieved and the item will be removed or retained, respectively. The steering group  
45 will discuss the ratings and qualitative feedback received, including rewording suggestions per criterion,  
46 suggestions to add new phases, steps or criteria and more general comments or questions. Criteria will be  
47 revised if two or more respondents suggest it, or if the steering group members agree that the item would  
48 benefit from rewording or merging.  
49

50  
51 Following the second survey round, a consensus meeting involving the steering group will be held. Decisions on  
52 whether to conduct a third round and retain items in the scale will be made based on the ratings in the survey  
53 rounds and feedback/comments from participants. The ratings will be summarized using percentages and the  
54 views of all participants will be given equal weight. If at least 80% of participants rate the importance of the item  
55 in the lower two categories, or in the higher two categories, we will consider consensus to be achieved and the  
56 item will be removed or retained, respectively. If no consensus is achieved, the steering group will decide  
57  
58  
59



1  
2 whether or not to retain a criterion, basing this decision on qualitative feedback from the participants where  
3 possible, and the steering group's views.  
4  
5  
6

## 7 **DISCUSSION**

8 Patient decision aids must have accurate and trustworthy evidence-based information about the risks and  
9 benefits of health treatments and tests, as these tools help patients make important healthcare choices. We  
10 want to generate consensus on an approach for selecting and summarizing the evidence included in patient  
11 decision aids, which we hope can be widely adopted by decision aid developers.  
12

## 13 **STRENGTHS AND LIMITATIONS**

14 A strength of this study is the systematic involvement of patients and relevant stakeholders in planning the  
15 modified Delphi survey. We plan to include a diverse sample of participant stakeholders including patients,  
16 researchers, patient decision aid developers and health policy makers. Limitations of online surveys always  
17 include the possibility of selection biases, meaning participants who opt to take the survey may be  
18 systematically different than the target population. In our case, the participants may be more engaged and more  
19 interested in the outcome of the Delphi survey. There is also a possibility that their views will be stronger than  
20 those who opted not to participate.  
21  
22

## 23 **CONCLUSION**

24 Patients should be able to trust the information they receive from patient decision aids. Together with their  
25 clinicians, family and caregivers, they rely on these tools to make decisions that are aligned with their informed  
26 preferences. We believe standardizing a process for selecting and summarizing the evidence included in patient  
27 decision aids is therefore a worthwhile effort. Bringing all relevant stakeholders to the table - patients,  
28 researchers, patient decision aid developers, and healthcare policy makers - will ensure that the ultimate  
29 outcome is rigorous and rooted in consensus, to promote widespread adoption.  
30  
31

## 32 **ETHICS AND DISSEMINATION**

33 Dartmouth College's Committee for the Protection of Human Subjects approved this protocol. We plan to  
34 publish our results in a peer-reviewed journal.  
35  
36

## 37 **FUNDING**

38 We did not receive funding for this project.  
39  
40

## 41 **COMPETING INTERESTS**

42 Glyn Elwyn and Marie-Anne Durand have developed the Option Grid patient decision aids, and EBSCO  
43 Information Services sells subscription access to Option Grid patient decision aids. They receive consulting  
44 income from EBSCO Health, and may receive royalties in the future. Glyn Elwyn and Marie-Anne Durand are  
45 consultant for ACCESS Community Health Network. Brian S. Alper is employed full-time by EBSCO Information  
46 Services which is a for-profit company that publishes patient decision aids. No other competing interests  
47 declared.  
48

## 49 **AUTHORSHIP CONTRIBUTIONS**

50 Marie-Anne Durand, Glyn Elwyn and Michelle D. Dannenberg planned and designed the study. Catherine H.  
51 Saunders, Anik Giguère, Brian S. Alper, Tammy Hoffmann, Lilisbeth Perestelo Perez and Stephen T. Campbell  
52 provided advice and guidance on the design. Marie-Anne Durand drafted the manuscript and all authors  
53 contributed to writing and approved the final draft of the manuscript.  
54  
55  
56  
57  
58  
59  
60

1  
2  
3 **REFERENCES**  
4

- 5 1. Stacey D, Legare F, Lewis K, Barry MJ, Bennett CL, Eden KB, et al. Decision aids for people facing health  
6 treatment or screening decisions. The Cochrane database of systematic reviews. 2017;4:CD001431.
- 7 2. Michelle D. Dannenberg M-AD, Clifford Reilly, Victor Montori, Glyn Elwyn., editor Comparative Analysis  
8 of Evidence Synthesis Methods by Organizations that Produce Patient-facing Decision Aids. . International  
9 Shared Decision Making Conference; 2017 July 2-5 2017; Lyon, France.
- 10 3. Elwyn G, O'Connor AM, Bennett C, Newcombe RG, Politi M, Durand MA, et al. Assessing the quality of  
11 decision support technologies using the International Patient Decision Aid Standards instrument (IPDASi). PLoS  
12 ONE. 2009;4(3):e4705.
- 13 4. Durand MA, Witt J, Joseph-Williams N, Newcombe RG, Politi MC, Sivell S, et al. Minimum standards for  
14 the certification of patient decision support interventions: feasibility and application. Patient Educ Couns.  
15 2015;98(4):462-8.
- 16 5. Joseph-Williams N, Newcombe R, Politi M, Durand MA, Sivell S, Stacey D, et al. Toward Minimum  
17 Standards for Certifying Patient Decision Aids: A Modified Delphi Consensus Process. Med Decis Making.  
18 2014;34(6):699-710.
- 19 6. Authority WSHC. Patient decision aids certification 2018 [Available from:  
20 <https://www.hca.wa.gov/about-hca/healthier-washington/patient-decision-aids-pdas>.
- 21 7. Higgins JG, S. Cochrane Handbook for Systematic Reviews of Interventions Version 5.1.0. 2011.
- 22 8. Schünemann H, Brożek J, Guyatt G, Oxman A. GRADE Handbook: The GRADE Working Group; 2013.
- 23 9. Qaseem A, Forland F, Macbeth F, Ollenschlager G, Phillips S, van der Wees P, et al. Guidelines  
24 International Network: toward international standards for clinical practice guidelines. Ann Intern Med.  
25 2012;156(7):525-31.
- 26 10. Schunemann HJ, Al-Ansary LA, Forland F, Kersten S, Komulainen J, Kopp IB, et al. Guidelines  
27 International Network: Principles for Disclosure of Interests and Management of Conflicts in Guidelines. Ann  
28 Intern Med. 2015;163(7):548-53.
- 29 11. Institute of Medicine. Standards for systematic reviews 2011 [Available from:  
30 <http://www.nationalacademies.org/hmd/Reports/2011/Finding-What-Works-in-Health-Care-Standards-for-Systematic-Reviews/Standards.aspx>.
- 31 12. Moher D, Liberati A, Tetzlaff J, Altman DG. Preferred reporting items for systematic reviews and meta-  
32 analyses: the PRISMA statement. PLoS Med. 2009;6(7):e1000097.
- 33 13. Brouwers MC, Kho ME, Browman GP, Burgers JS, Cluzeau F, Feder G, et al. The Global Rating Scale  
34 complements the AGREE II in advancing the quality of practice guidelines. J Clin Epidemiol. 2012;65(5):526-34.
- 35 14. Brouwers MC, Kho ME, Browman GP, Burgers JS, Cluzeau F, Feder G, et al. Development of the AGREE II,  
36 part 1: performance, usefulness and areas for improvement. CMAJ. 2010;182(10):1045-52.
- 37 15. Brouwers MC, Kho ME, Browman GP, Burgers JS, Cluzeau F, Feder G, et al. Development of the AGREE II,  
38 part 2: assessment of validity of items and tools to support application. CMAJ. 2010;182(10):E472-8.
- 39 16. Cluzeau F, Trust AR. Conflicting recommendations. Let's not forget AGREE. BMJ. 2009;338:b407.
- 40 17. Elwyn G, O'Connor A, Stacey D, Volk R, Edwards A, Coulter A, et al. Developing a quality criteria  
41 framework for patient decision aids: online international Delphi consensus process. BMJ. 2006;333(7565):417.
- 42 18. Murphy MK, Black NA, Lamping DL, McKee CM, Sanderson CF, Askham J, et al. Consensus development  
43 methods, and their use in clinical guideline development. Health Technol Assess. 1998;2(3):i-iv, 1-88.
- 44 19. Jones J, Hunter D. Consensus methods for medical and health services research. BMJ.  
45 1995;311(7001):376-80.
- 46
- 47
- 48
- 49
- 50
- 51
- 52
- 53
- 54
- 55
- 56
- 57
- 58
- 59
- 60

1  
2 **Supplementary File 1: Survey Invitation**

3  
4 SUBJ: Help us make more trustworthy patient materials: provide your feedback through a survey

5  
6 To the members of [group name/list-serv name] –

7  
8  
9 We are an international workgroup, led by Marie-Anne Durand and Glyn Elwyn at The Dartmouth Institute for Health Policy and  
10 Clinical Practice in Lebanon, N.H. We noticed a need for more clarity about how to select and summarize the evidence included  
11 in patient decision aids. Patient decision aids influence the decisions that patients make - so the need for trustworthy tools is  
12 important.  
13

14  
15 We wish to have your perspective, as an expert, patient, or other stakeholder.  
16

17  
18 **Please could you provide feedback via 2-3 surveys over the next few weeks?** Each survey should take less than 25  
19 minutes.  
20

21  
22 Please click the link below for more information and the first survey.  
23

24  
25 Many thanks,  
26

27  
28 The Evidence Summarization workgroup  
29  
30  
31  
32  
33  
34  
35  
36  
37  
38  
39  
40  
41  
42  
43  
44  
45  
46  
47

For peer review only

1  
2  
3  
4  
5  
6  
7  
8  
9  
10  
11  
12  
13  
14  
15  
16  
17  
18  
19  
20  
21  
22  
23  
24  
25  
26  
27  
28  
29  
30  
31  
32  
33  
34  
35  
36  
37  
38  
39  
40  
41  
42  
43  
44  
45  
46  
47

# Evidence Summarization Survey

## Information Sheet

## SURVEY INFORMATION

### What is the study about?

We want to generate consensus on an approach for selecting and summarizing the evidence included in patient decision aids. Our workgroup developed a proposed set of Phases, Steps and Criteria, based on the methods used to develop trustworthy clinical practice guidelines. The purpose of this survey is to gain your perspective, as an expert, patient or other stakeholder.

### What is involved?

If you participate, we'll ask you to complete two or three surveys. In the first survey, we'll ask for your perspective on the proposed Phases, Steps and Criteria. This will include rating importance, suggesting wording changes and suggesting additional items. In the second and third surveys, we'll ask similar questions except we'll also share some results from the first survey.

### How long will it take?

Completing this survey should take less than 25 minutes.

### Do I have to take part?

No. Taking part is voluntary.

### Will I be compensated?

You won't be compensated. However, we hope you'll take part. Your contributions

will improve the process of developing reliable, high-quality decision aids for patients.

**Are there any risks?**

We don't anticipate any risks from participating in the study.

**How will my privacy be protected?**

We won't name any individuals in any publications or presentations.

**How can I contact you?**

If you have questions, please feel free to contact Michelle Dannenberg (Michelle.D.Dannenberg@dartmouth.edu), Research Coordinator, The Dartmouth Institute for Health Policy and Clinical Practice, Dartmouth College.

If you would like to speak to the researchers leading this study, please contact Prof. Marie-Anne Durand (Marie-Anne.Durand@dartmouth.edu) or Prof. Glyn Elwyn (glynelwyn@gmail.com), The Dartmouth Institute for Health Policy and Clinical Practice, Dartmouth College.

**What happens if I do not respond?**

You'll receive two automated email reminders to complete the survey.

Do you want to participate?

Yes

No

**Background Questions**

**BACKGROUND QUESTIONS**

1 Which of the following best describes you? Please select all that apply.  
2  
3

- 4  Patient Decision Aid (PDA) developer
- 5
- 6  Researcher
- 7
- 8  International Patient Decision Aids Standards (IPDAS) collaboration member
- 9
- 10  Policy maker
- 11
- 12  Patient
- 13
- 14
- 15  Clinician, please specify specialty:
- 16
- 17
- 18  Other, please specify:
- 19
- 20
- 21
- 22

23 Which country do you live in?  
24

25

26

27

28

29

30 What is your gender?  
31

- 32
- 33  Male
- 34
- 35  Female
- 36
- 37  Other
- 38
- 39
- 40
- 41

42 What is your race/ethnicity? Please select all that apply.  
43

- 44
- 45  American Indian or Alaska Native
- 46
- 47  Asian
- 48
- 49  Black or African American
- 50
- 51  Native Hawaiian or Other Pacific Islander
- 52
- 53  Hispanic, Latino/a or Spanish Origin
- 54
- 55  White
- 56
- 57
- 58

Other, please specify:

## BACKGROUND QUESTIONS

We're requesting your email address so we can contact you for the next phase of this project. We will not share your email with anyone outside the study team, and we will not contact you about anything other than the study.

Please provide your email:

### Overall Proposed Phases, Steps and Criteria

## INFORMATION ON PROPOSED PROCESS

**Decision aids are tools that help patients make choices.** They provide information about the risks and benefits of health treatments and tests.

**Accurate and clear information is critical.** It's important for decision aids to have accurate and trustworthy information from research evidence about the risks and benefits of health treatments and tests.

**We're trying to make evidence summarization easier.** We're doing this by developing a process to guide decision aid developers in evidence summarization.

**We're building on the good work that's already been done.** This process includes the existing work of the International Patient Decision Aid Standards (IPDAS) collaboration.

**We sketched out a proposed process,** see Figure below. We are interested in your feedback on ALL elements of this, including the Phases, Steps and Criteria, as

For peer review only - <http://bmjopen.bmj.com/site/about/guidelines.xhtml>



well as the order and grouping.

1  
2  
3 **Here's how you can help.** In the questions that follow, we will ask for your  
4 perspective on **how important each criterion is to include in the proposed**  
5 **process.** We will also ask for feedback on the wording of all parts. Nothing is final.  
6  
7 Everything is up for discussion, and we are looking forward to hearing from you.  
8  
9

10  
11 **Below is a visual representation of the proposed process.** Review it carefully.  
12 There are four proposed phases, each with one to five proposed steps. Each step  
13 has a number of proposed Criteria. In the visual representation below, we show the  
14 first Criteria for each step. The tabs represent additional Criteria.  
15  
16  
17  
18

19  
20 Feel free to [click here](#) to view the representation of the proposed Phases, Steps  
21 and Criteria in a separate window. You can click on the image to zoom. You can  
22 refer back to this image as you answer questions about the proposed process. Don't  
23 worry, if you accidentally close the window, there are links to the figure on each page  
24 of the survey.  
25  
26  
27  
28  
29  
30  
31  
32  
33  
34  
35  
36  
37  
38  
39  
40  
41  
42  
43  
44  
45  
46  
47  
48  
49  
50  
51  
52  
53  
54  
55  
56  
57  
58  
59  
60

# Proposed Phases, Steps and Criteria

## For the Evidence Summarization of Patient Decision Aids

| Phase                                             | Step                                             | Criteria                                                                                                                                                         |
|---------------------------------------------------|--------------------------------------------------|------------------------------------------------------------------------------------------------------------------------------------------------------------------|
| <b>Phase 1</b><br>Define Process and Scope        | Define the Question                              | 1/3 The question is defined according to which population is relevant for this PDA.                                                                              |
|                                                   | Document Process and Policies                    | 1/4 The evidence summarization process is documented.                                                                                                            |
|                                                   | Manage COI                                       | 1/4 The conflicts of interest of people who summarize evidence are collected.                                                                                    |
|                                                   | Assemble Team                                    | 1/4 A multidisciplinary team is assembled.                                                                                                                       |
|                                                   | Define the Scope of Patient Decision Aid Content | 1/6 The population for whom the PDA is designed for is appropriate.                                                                                              |
| <b>Phase 2</b><br>Finding and Appraising Evidence | Search for Evidence                              | 1/6 There is a systematic search for evidence that relates to the options included in the PDA.                                                                   |
|                                                   | Select Evidence                                  | 1/4 There is a systematic process for selecting evidence for outcomes or patient concerns to include in the PDA.                                                 |
|                                                   | Appraise Evidence                                | 1/5 Evidence selected for inclusion in the PDA is critically appraised with a defined protocol.                                                                  |
| <b>Phase 3</b><br>Presenting Evidence             | Articulate the Information                       | 1/5 The evidence (or evidentiary gaps) about potential benefits relevant to each option is summarized in balanced ways, not expected to bias the interpretation. |
|                                                   | Manage COI                                       | 1/3 The conflicts of interest of people who summarize evidence are collected again before publishing the PDA.                                                    |
|                                                   | Report                                           | 1/4 The methods used to translate evidence to risk communication formats are reported.                                                                           |
|                                                   | Review                                           | 1/1 The PDA is reviewed externally.                                                                                                                              |
| <b>Phase 4</b><br>Updating                        | Update                                           | 1/1 The PDA content is updated when new evidence becomes available.                                                                                              |

### Phase 1

## PROPOSED PHASE 1

# Proposed Phases, Steps and Criteria

## For the Evidence Summarization of Patient Decision Aids

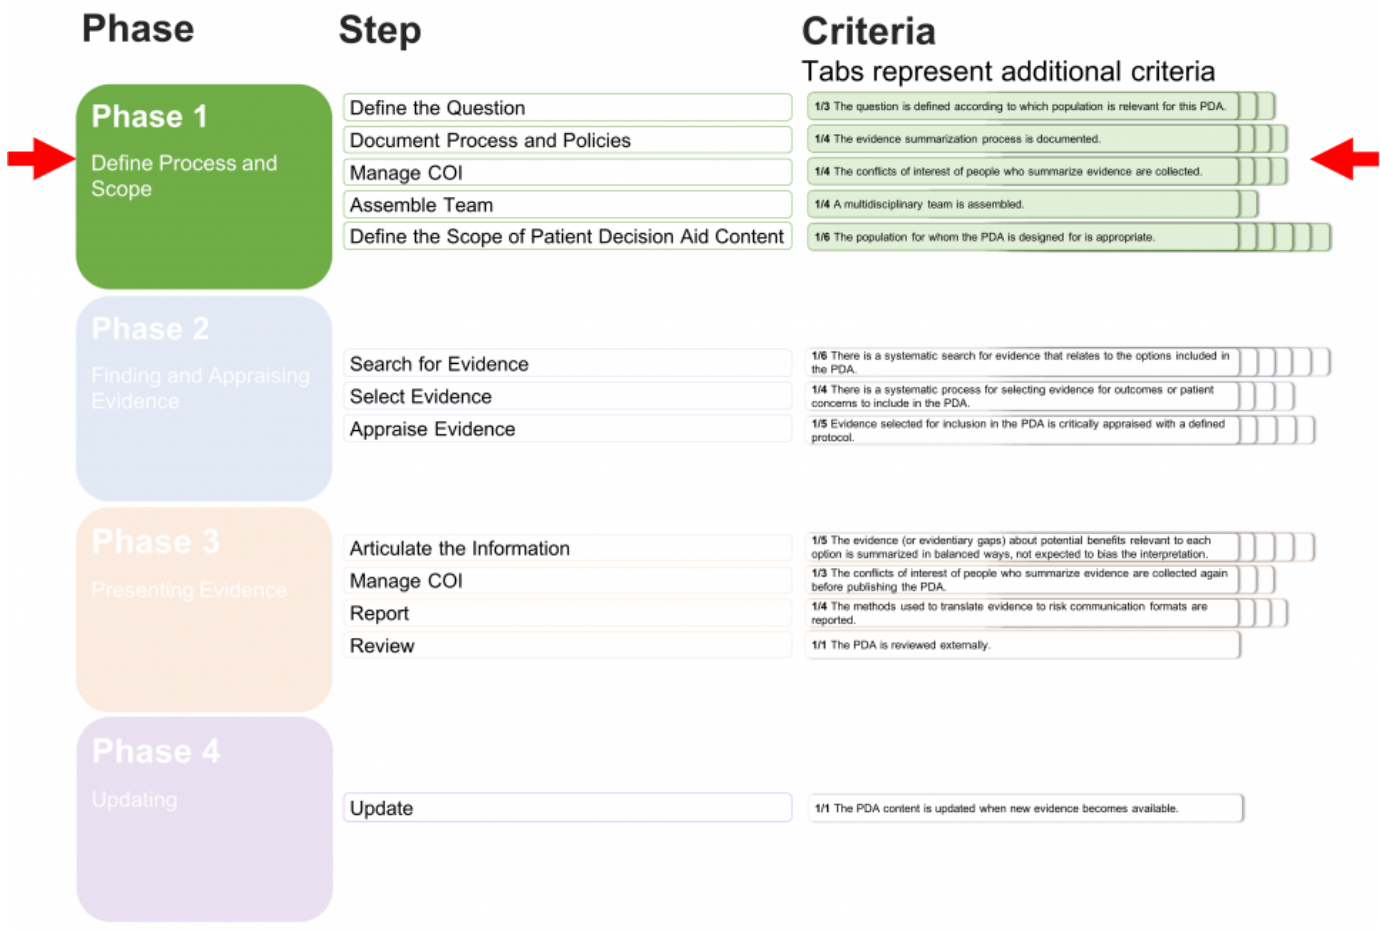

Feel free to [click here](#) to view a visualization of the proposed Phases, Steps and Criteria in a separate window while you complete the questions below.

Do you have any comments or suggestions on the Phase below? If so, please share them.

- Phase 1: Defining Process and Scope**

1 Do you have any comments on the Steps below, including their wording or order? Or  
2 suggestions for additional steps? If so, please share them.  
3  
4

- 5 • **Step 1: Define the Question**
- 6 • **Step 2: Document Process and Policies**
- 7 • **Step 3: Manage COI**
- 8 • **Step 4: Assemble Team**
- 9 • **Step 5: Define the Scope of Patient Decision Aid Content**
- 10
- 11
- 12
- 13
- 14
- 15

16

17

18

19

## 20 **PROPOSED PHASE 1 STEP 1**

21

22

23

24

25

26

27

28

29

30

31

32

33

34

35

36

37

38

39

40

41

42

43

44

45

46

47

48

49

50

51

52

53

54

55

56

57

58

59

60

# Proposed Phases, Steps and Criteria

For the Evidence Summarization of Patient Decision Aids

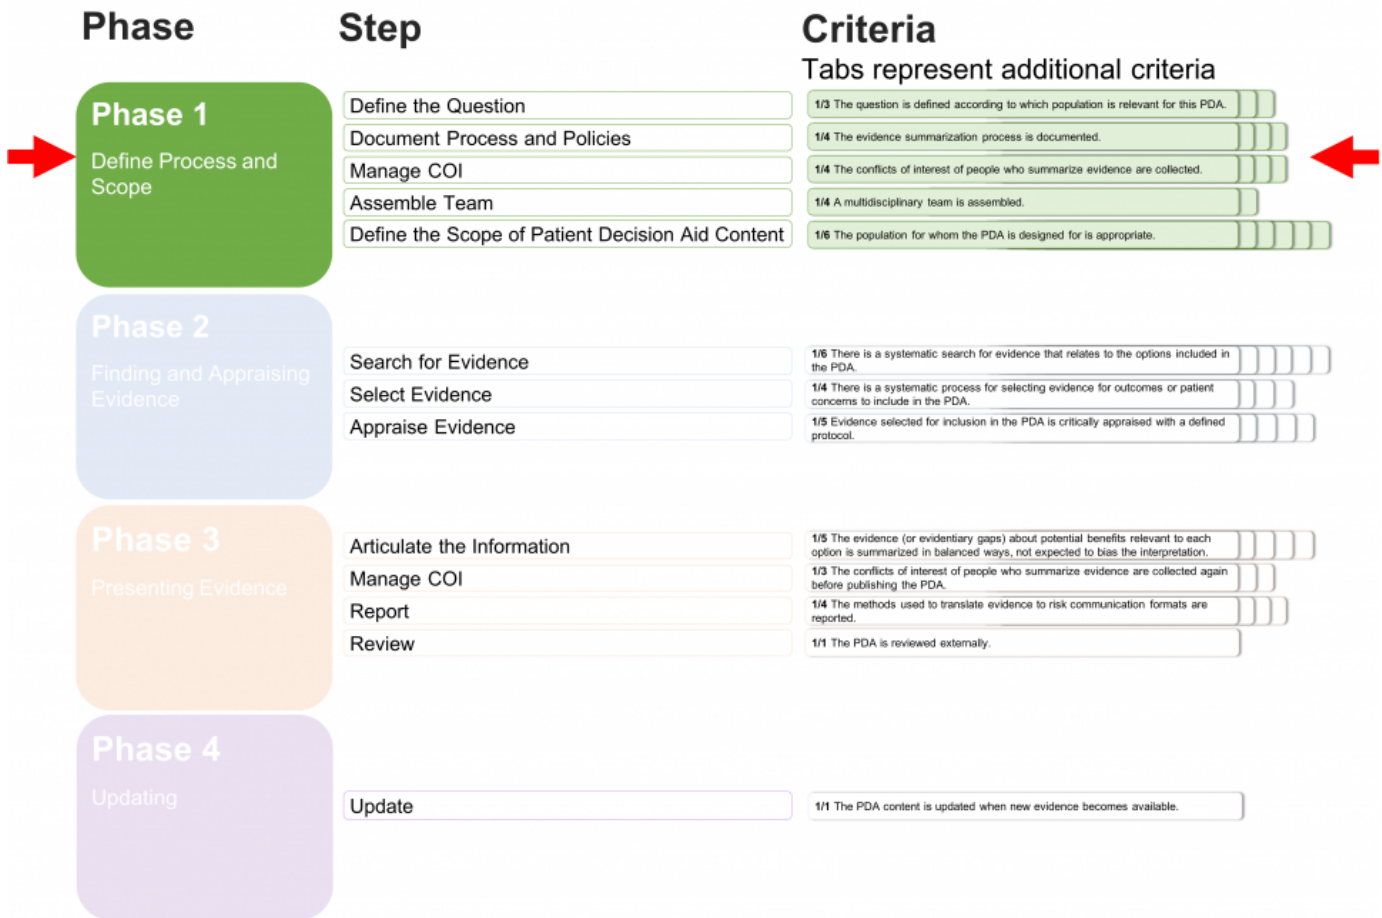

Feel free to [click here](#) to view a visualization of the proposed Phases, Steps and Criteria in a separate window while you complete the questions below.

Do you have any comments or suggestions on the Step below? If so, please share them.

- Step 1: Define the Question**

The proposed Criteria for this step are below. Please indicate whether each Criterium should be omitted, or whether it is a possible candidate for inclusion, a desirable candidate for inclusion or is essential for inclusion.

Omit Possible Desira

The question is defined according to which population is relevant for this PDA.

The question is defined according to which options are relevant for this PDA.

The question is defined according to which outcomes or patient concerns are relevant for this PDA.

Do you have any comments or suggestions on the Criteria above? If so, please share them.

Do you have any suggestions for additional Criteria to include in this Step? If so, please share them.

## PROPOSED PHASE 1 STEP 2

# Proposed Phases, Steps and Criteria

For the Evidence Summarization of Patient Decision Aids



Feel free to [click here](#) to view a visualization of the proposed Phases, Steps and Criteria in a separate window while you complete the questions below.

Do you have any comments or suggestions on this Step? If so, please share them.

- **Step 2: Document Process and Policies**

The proposed Criteria for this step are below. Please indicate whether each Criterium should be omitted, or whether it is a possible candidate for inclusion, a desirable candidate for inclusion or is essential for inclusion.

Omit Possible E

- The evidence summarization process is documented.
- The evidence summarization process minimizes bias.
- The evidence summarization process minimizes conflicts of interest.
- The conflict of interest policy applying to people who summarize evidence is documented.

Do you have any comments or suggestions on the Criteria above? If so, please share them.

Do you have any suggestions for additional Criteria to include in this Step? If so, please share them.

### PROPOSED PHASE 1 STEP 3



# Proposed Phases, Steps and Criteria

For the Evidence Summarization of Patient Decision Aids



Feel free to [click here](#) to view a visualization of the proposed Phases, Steps and Criteria in a separate window while you complete the questions below.

Do you have any comments or suggestions on this Step? If so, please share them.

- **Step 3: Manage COI**

The proposed Criteria for this step are below. Please indicate whether each Criterium should be omitted, or whether it is a possible candidate for inclusion, a desirable candidate for inclusion or is essential for inclusion.

Omit Possible E

The conflicts of interest of people who summarize evidence are collected.

Actions are taken to manage relevant conflicts of interest.

The actions taken on relevant conflicts of interest are documented.

Conflicts of interest are monitored over the course of PDA development.

Do you have any comments or suggestions on the Criteria above? If so, please share them.

Do you have any suggestions for additional Criteria to include in this Step? If so, please share them.

## PROPOSED PHASE 1 STEP 4

# Proposed Phases, Steps and Criteria

## For the Evidence Summarization of Patient Decision Aids



Feel free to [click here](#) to view a visualization of the proposed Phases, Steps and Criteria in a separate window while you complete the questions below.

Do you have any comments or suggestions on the Step below? If so, please share them.

- **Step 4: Assemble Team**

1  
2  
3  
4  
5  
6  
7  
8  
9  
10  
11  
12  
13  
14  
15  
16  
17  
18  
19  
20  
21  
22  
23  
24  
25  
26  
27  
28  
29  
30  
31  
32  
33  
34  
35  
36  
37  
38  
39  
40  
41  
42  
43  
44  
45  
46  
47  
48  
49  
50  
51  
52  
53  
54  
55  
56  
57  
58  
59  
60

The proposed Criteria for this step are below. Please indicate whether each Criterium should be omitted, or whether it is a possible candidate for inclusion, a desirable candidate for inclusion or is essential for inclusion.

Omit Possible [

A multidisciplinary team is assembled.

The team comprises clinicians.

The team comprises methodological experts.

The team comprises patient or consumer representatives.

Do you have any comments or suggestions on the Criteria above? If so, please share them.

Do you have any suggestions for additional Criteria to include in this Step? If so, please share them.

## PROPOSED PHASE 1 STEP 5

# Proposed Phases, Steps and Criteria

## For the Evidence Summarization of Patient Decision Aids



Feel free to [click here](#) to view a visualization of the proposed Phases, Steps and Criteria in a separate window while you complete the questions below.

Do you have any comments or suggestions on the Step below? If so, please share them.

- Step 5: Define the Scope of Patient Decision Aid Content**

The proposed Criteria for this step are below. Please indicate whether each Criterium should be omitted, or whether it is a possible candidate for inclusion, a desirable candidate for inclusion or is essential for inclusion.

Omit Possible C

The population for whom the PDA is designed for is appropriate.

There is a systematic process to reduce bias in the definition of the population for the PDA.

The options for inclusion in the PDA are appropriate for the intended population.

There is a systematic process to reduce bias in the definition of the options for the PDA.

The outcomes or patient concerns for inclusion in the PDA are appropriate for the intended population and options.

There is a systematic process to reduce bias in the definition of the outcomes or patient concerns for the PDA.

Do you have any comments or suggestions on the Criteria above? If so, please share them.

Do you have any suggestions for additional Criteria to include in this Step? If so, please share them.

## Phase 2

## PROPOSED PHASE 2

# Proposed Phases, Steps and Criteria

## For the Evidence Summarization of Patient Decision Aids

### Phase

### Step

### Criteria

Tabs represent additional criteria

|                                                   |                                                  |                                                                                                                                                                  |
|---------------------------------------------------|--------------------------------------------------|------------------------------------------------------------------------------------------------------------------------------------------------------------------|
| <b>Phase 1</b><br>Define Process and Scope        | Define the Question                              | 1/3 The question is defined according to which population is relevant for this PDA.                                                                              |
|                                                   | Document Process and Policies                    | 1/4 The evidence summarization process is documented.                                                                                                            |
|                                                   | Manage COI                                       | 1/4 The conflicts of interest of people who summarize evidence are collected.                                                                                    |
|                                                   | Assemble Team                                    | 1/4 A multidisciplinary team is assembled.                                                                                                                       |
|                                                   | Define the Scope of Patient Decision Aid Content | 1/6 The population for whom the PDA is designed for is appropriate.                                                                                              |
| <b>Phase 2</b><br>Finding and Appraising Evidence | Search for Evidence                              | 1/6 There is a systematic search for evidence that relates to the options included in the PDA.                                                                   |
|                                                   | Select Evidence                                  | 1/4 There is a systematic process for selecting evidence for outcomes or patient concerns to include in the PDA.                                                 |
|                                                   | Appraise Evidence                                | 1/5 Evidence selected for inclusion in the PDA is critically appraised with a defined protocol.                                                                  |
| <b>Phase 3</b><br>Presenting Evidence             | Articulate the Information                       | 1/5 The evidence (or evidentiary gaps) about potential benefits relevant to each option is summarized in balanced ways, not expected to bias the interpretation. |
|                                                   | Manage COI                                       | 1/3 The conflicts of interest of people who summarize evidence are collected again before publishing the PDA.                                                    |
|                                                   | Report                                           | 1/4 The methods used to translate evidence to risk communication formats are reported.                                                                           |
|                                                   | Review                                           | 1/1 The PDA is reviewed externally.                                                                                                                              |
| <b>Phase 4</b><br>Updating                        | Update                                           | 1/1 The PDA content is updated when new evidence becomes available.                                                                                              |

Feel free to [click here](#) to view a visualization of the proposed Phases, Steps and Criteria in a separate window while you complete the questions below.

Do you have any comments or suggestions on the Phase below? If so, please share them.

- Phase 2: Finding & Appraising Evidence**

Do you have any comments on the Steps below, including their wording or order? Or suggestions for additional steps? If so, please share them.

- Step 1: Search for Evidence
- Step 2: Select Evidence
- Step 3: Appraise Evidence

## PROPOSED PHASE 2 STEP 1

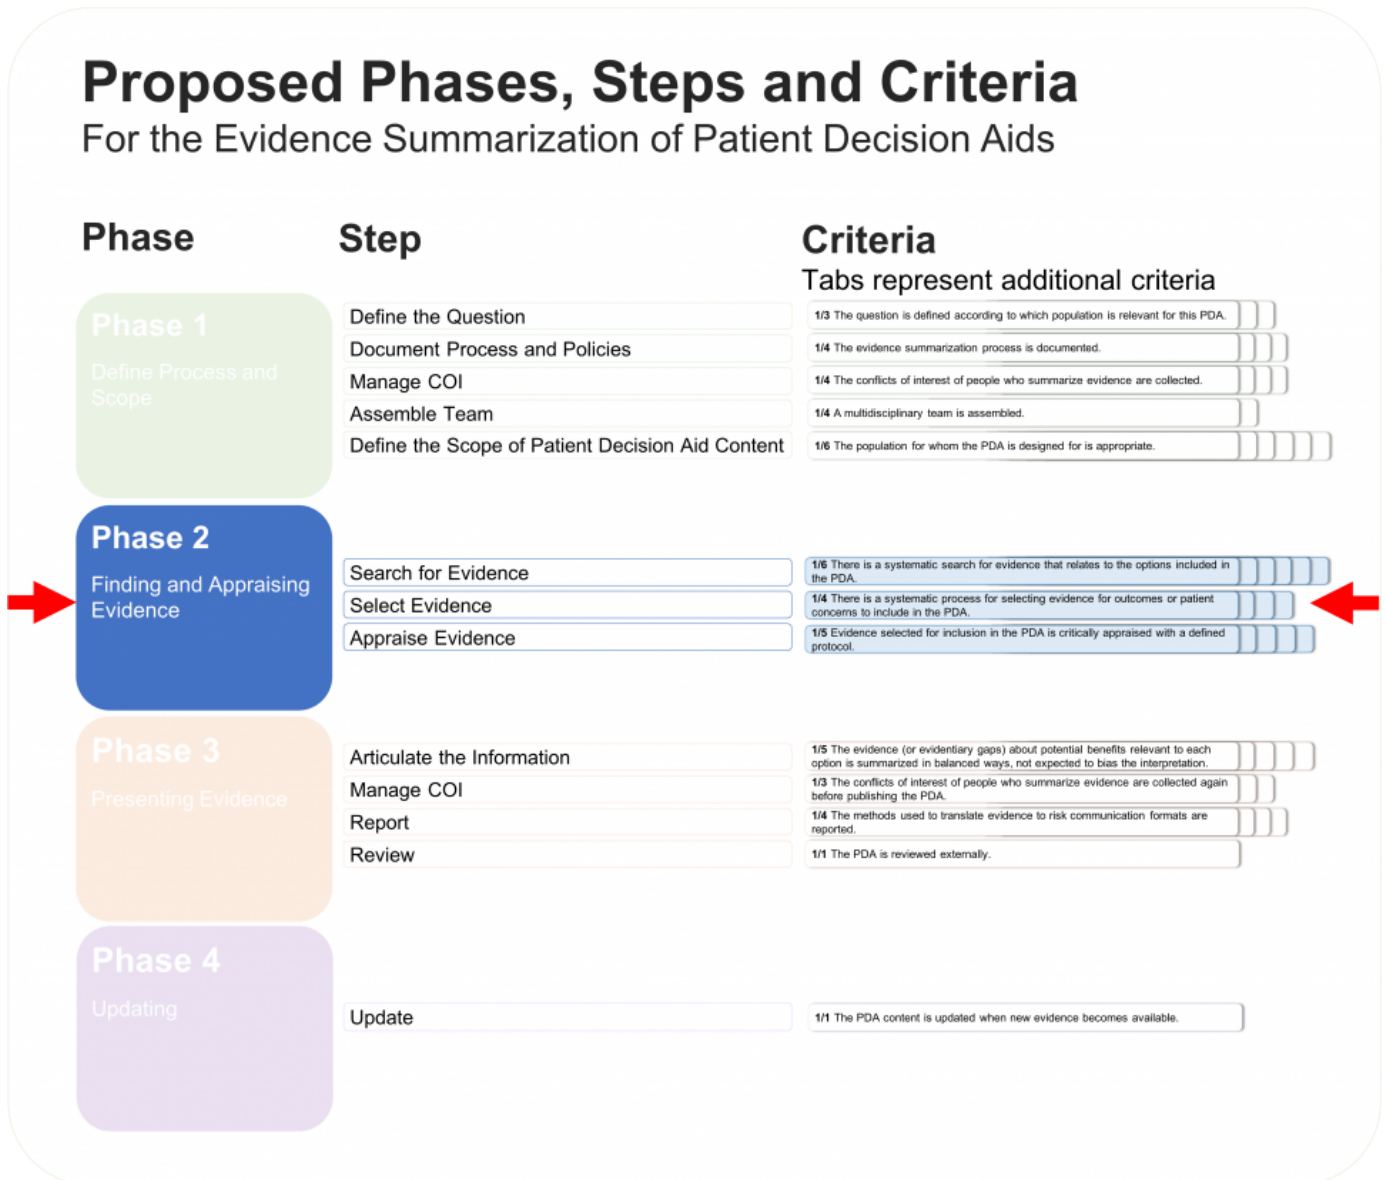



1  
2  
3  
4  
5  
6  
7  
8  
9  
10  
11  
12  
13  
14  
15  
16  
17  
18  
19  
20  
21  
22  
23  
24  
25  
26  
27  
28  
29  
30  
31  
32  
33  
34  
35  
36  
37  
38  
39  
40  
41  
42  
43  
44  
45  
46  
47  
48  
49  
50  
51  
52  
53  
54  
55  
56  
57  
58  
59  
60

Feel free to [click here](#) to view a visualization of the proposed Phases, Steps and Criteria in a separate window while you complete the questions below.

Do you have any comments or suggestions on this Step? If so, please share them.

- Step 1: Search for Evidence**

The proposed Criteria for this step are below. Please indicate whether each Criterium should be omitted, or whether it is a possible candidate for inclusion, a desirable candidate for inclusion or is essential for inclusion.

|                                                                                                                                                                        | Omit                  | Possible              | Essential             |
|------------------------------------------------------------------------------------------------------------------------------------------------------------------------|-----------------------|-----------------------|-----------------------|
| There is a systematic search for evidence that relates to the options included in the PDA.                                                                             | <input type="radio"/> | <input type="radio"/> | <input type="radio"/> |
| There is a systematic search for evidence that relates to the outcomes or patient concerns included in the PDA.                                                        | <input type="radio"/> | <input type="radio"/> | <input type="radio"/> |
| If the PDA is customizable to individual patient factors, there is a systematic search for evidence of how individual patient factors influence the expected outcomes. | <input type="radio"/> | <input type="radio"/> | <input type="radio"/> |

Do you have any comments or suggestions on the Criteria above? If so, please share them.

Do you have any suggestions for additional Criteria to include in this Step? If so, please share them.

# PROPOSED PHASE 2 STEP 2

## Proposed Phases, Steps and Criteria For the Evidence Summarization of Patient Decision Aids

| Phase                                      | Step                                             | Criteria                                                                                                                                                         |
|--------------------------------------------|--------------------------------------------------|------------------------------------------------------------------------------------------------------------------------------------------------------------------|
| Phase 1<br>Define Process and Scope        | Define the Question                              | 1/3 The question is defined according to which population is relevant for this PDA.                                                                              |
|                                            | Document Process and Policies                    | 1/4 The evidence summarization process is documented.                                                                                                            |
|                                            | Manage COI                                       | 1/4 The conflicts of interest of people who summarize evidence are collected.                                                                                    |
|                                            | Assemble Team                                    | 1/4 A multidisciplinary team is assembled.                                                                                                                       |
|                                            | Define the Scope of Patient Decision Aid Content | 1/6 The population for whom the PDA is designed for is appropriate.                                                                                              |
| Phase 2<br>Finding and Appraising Evidence | Search for Evidence                              | 1/6 There is a systematic search for evidence that relates to the options included in the PDA.                                                                   |
|                                            | Select Evidence                                  | 1/4 There is a systematic process for selecting evidence for outcomes or patient concerns to include in the PDA.                                                 |
|                                            | Appraise Evidence                                | 1/5 Evidence selected for inclusion in the PDA is critically appraised with a defined protocol.                                                                  |
| Phase 3<br>Presenting Evidence             | Articulate the Information                       | 1/5 The evidence (or evidentiary gaps) about potential benefits relevant to each option is summarized in balanced ways, not expected to bias the interpretation. |
|                                            | Manage COI                                       | 1/3 The conflicts of interest of people who summarize evidence are collected again before publishing the PDA.                                                    |
|                                            | Report                                           | 1/4 The methods used to translate evidence to risk communication formats are reported.                                                                           |
|                                            | Review                                           | 1/1 The PDA is reviewed externally.                                                                                                                              |
| Phase 4<br>Updating                        | Update                                           | 1/1 The PDA content is updated when new evidence becomes available.                                                                                              |

Feel free to [click here](#) to view a visualization of the proposed Phases, Steps and Criteria in a separate window while you complete the questions below.

Do you have any comments or suggestions on the Step below? If so, please share them.

- **Step 2: Select Evidence**

1  
2  
3  
4 The proposed Criteria for this step are below. Please indicate whether each  
5 Criterium should be omitted, or whether it is a possible candidate for inclusion,  
6 a desirable candidate for inclusion or is essential for inclusion.  
7  
8  
9

|    | Omit | Possible | Essential |
|----|------|----------|-----------|
| 10 |      |          |           |
| 11 |      |          |           |
| 12 |      |          |           |
| 13 |      |          |           |
| 14 |      |          |           |
| 15 |      |          |           |
| 16 |      |          |           |
| 17 |      |          |           |
| 18 |      |          |           |
| 19 |      |          |           |
| 20 |      |          |           |
| 21 |      |          |           |
| 22 |      |          |           |
| 23 |      |          |           |
| 24 |      |          |           |
| 25 |      |          |           |
| 26 |      |          |           |
| 27 |      |          |           |
| 28 |      |          |           |
| 29 |      |          |           |
| 30 |      |          |           |
| 31 |      |          |           |
| 32 |      |          |           |
| 33 |      |          |           |
| 34 |      |          |           |
| 35 |      |          |           |
| 36 |      |          |           |
| 37 |      |          |           |
| 38 |      |          |           |
| 39 |      |          |           |
| 40 |      |          |           |
| 41 |      |          |           |
| 42 |      |          |           |
| 43 |      |          |           |
| 44 |      |          |           |
| 45 |      |          |           |
| 46 |      |          |           |
| 47 |      |          |           |
| 48 |      |          |           |
| 49 |      |          |           |
| 50 |      |          |           |
| 51 |      |          |           |
| 52 |      |          |           |
| 53 |      |          |           |
| 54 |      |          |           |
| 55 |      |          |           |
| 56 |      |          |           |
| 57 |      |          |           |
| 58 |      |          |           |
| 59 |      |          |           |
| 60 |      |          |           |

Do you have any comments or suggestions on the Criteria above? If so, please share them.

Do you have any suggestions for additional Criteria to include in this Step? If so, please share them.

## PROPOSED PHASE 2 STEP 3

# Proposed Phases, Steps and Criteria

## For the Evidence Summarization of Patient Decision Aids

| Phase                                      | Step                                             | Criteria                                                                                                                                                         |
|--------------------------------------------|--------------------------------------------------|------------------------------------------------------------------------------------------------------------------------------------------------------------------|
| Phase 1<br>Define Process and Scope        | Define the Question                              | 1/3 The question is defined according to which population is relevant for this PDA.                                                                              |
|                                            | Document Process and Policies                    | 1/4 The evidence summarization process is documented.                                                                                                            |
|                                            | Manage COI                                       | 1/4 The conflicts of interest of people who summarize evidence are collected.                                                                                    |
|                                            | Assemble Team                                    | 1/4 A multidisciplinary team is assembled.                                                                                                                       |
|                                            | Define the Scope of Patient Decision Aid Content | 1/6 The population for whom the PDA is designed for is appropriate.                                                                                              |
| Phase 2<br>Finding and Appraising Evidence | Search for Evidence                              | 1/6 There is a systematic search for evidence that relates to the options included in the PDA.                                                                   |
|                                            | Select Evidence                                  | 1/4 There is a systematic process for selecting evidence for outcomes or patient concerns to include in the PDA.                                                 |
|                                            | Appraise Evidence                                | 1/5 Evidence selected for inclusion in the PDA is critically appraised with a defined protocol.                                                                  |
| Phase 3<br>Presenting Evidence             | Articulate the Information                       | 1/5 The evidence (or evidentiary gaps) about potential benefits relevant to each option is summarized in balanced ways, not expected to bias the interpretation. |
|                                            | Manage COI                                       | 1/3 The conflicts of interest of people who summarize evidence are collected again before publishing the PDA.                                                    |
|                                            | Report                                           | 1/4 The methods used to translate evidence to risk communication formats are reported.                                                                           |
|                                            | Review                                           | 1/1 The PDA is reviewed externally.                                                                                                                              |
|                                            | Update                                           | 1/1 The PDA content is updated when new evidence becomes available.                                                                                              |

Feel free to [click here](#) to view a visualization of the proposed Phases, Steps and Criteria in a separate window while you complete the questions below.

Do you have any comments or suggestions on the Step below? If so, please share them.

- **Step 3: Appraise Evidence**

The proposed Criteria for this step are below. Please indicate whether each Criterium should be omitted, or whether it is a possible candidate for inclusion, a desirable candidate for inclusion or is essential for inclusion.

Omit Possible E

Evidence selected for inclusion in the PDA is critically appraised with a defined protocol (such as GRADE).

 

The protocol for critical appraisal of evidence accounts for risks of bias in study design.

 

The protocol for critical appraisal of evidence accounts for risks of bias in study analysis and reporting.

 

The protocol for critical appraisal of evidence accounts for assessment of certainty of evidence with attention to risk of bias, precision, directness, consistency, and publication bias.

 

The conflicts of interest of study authors related to selected evidence is appraised.

 

Do you have any comments or suggestions on the Criteria above? If so, please share them.

Do you have any suggestions for additional Criteria to include in this Step? If so, please share them.

### Phase 3

## PROPOSED PHASE 3

# Proposed Phases, Steps and Criteria

## For the Evidence Summarization of Patient Decision Aids

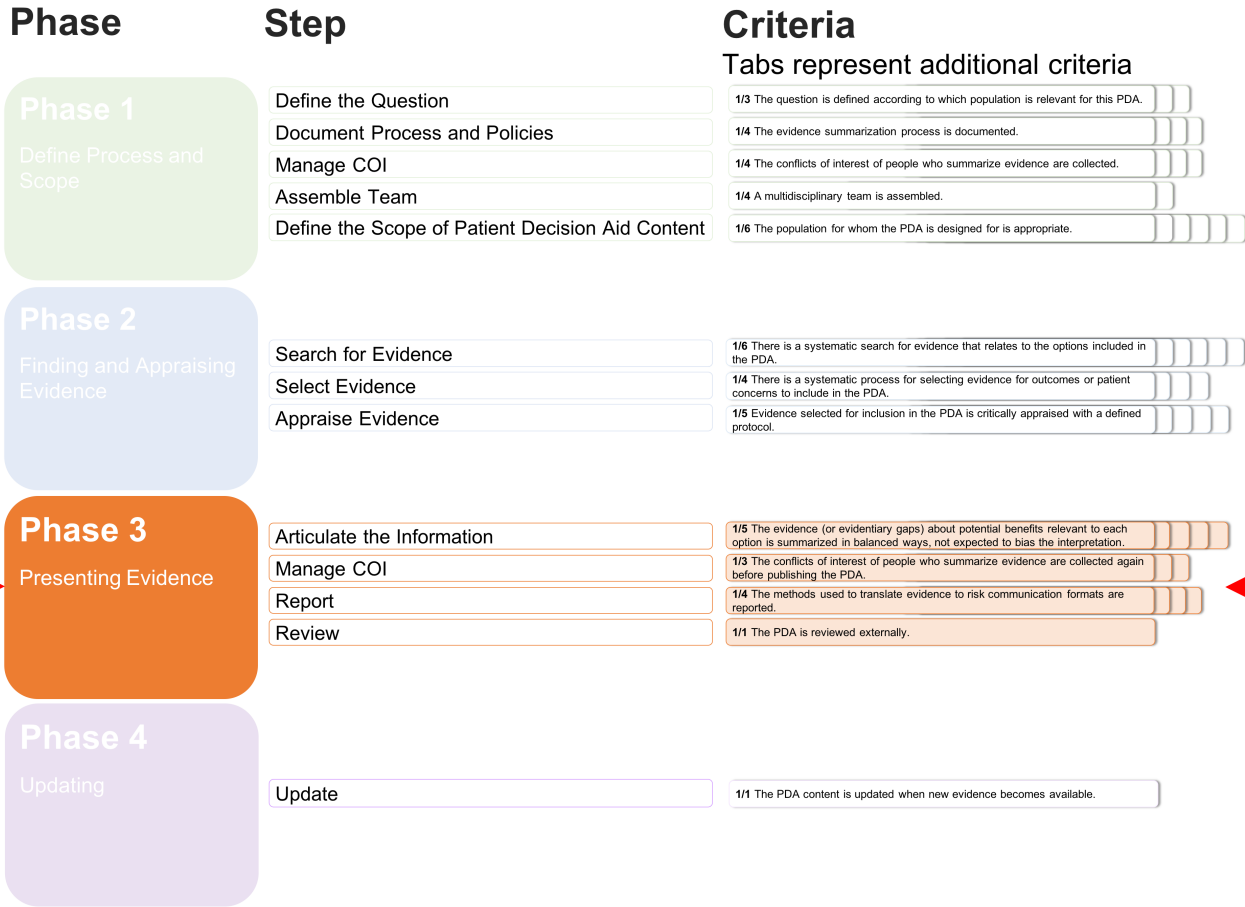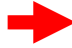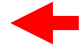

Feel free to [click here](#) to view a visualization of the proposed Phases, Steps and Criteria in a separate window while you complete the questions below.

Do you have any comments or suggestions on the Phase below? If so, please share them.

- Phase 3: Presenting Evidence

Do you have any comments on the Steps below, including their wording or order? Or do you have suggestions for additional steps? If so, please share them.

- Step 1: Articulate the Information
- Step 2: Manage COI
- Step 3: Report
- Step 4: Review

## PROPOSED PHASE 3 STEP 1

# Proposed Phases, Steps and Criteria

For the Evidence Summarization of Patient Decision Aids

| Phase                                      | Step                                             | Criteria                                                                                                                                                         |
|--------------------------------------------|--------------------------------------------------|------------------------------------------------------------------------------------------------------------------------------------------------------------------|
| Phase 1<br>Define Process and Scope        | Define the Question                              | 1/3 The question is defined according to which population is relevant for this PDA.                                                                              |
|                                            | Document Process and Policies                    | 1/4 The evidence summarization process is documented.                                                                                                            |
|                                            | Manage COI                                       | 1/4 The conflicts of interest of people who summarize evidence are collected.                                                                                    |
|                                            | Assemble Team                                    | 1/4 A multidisciplinary team is assembled.                                                                                                                       |
|                                            | Define the Scope of Patient Decision Aid Content | 1/6 The population for whom the PDA is designed for is appropriate.                                                                                              |
| Phase 2<br>Finding and Appraising Evidence | Search for Evidence                              | 1/6 There is a systematic search for evidence that relates to the options included in the PDA.                                                                   |
|                                            | Select Evidence                                  | 1/4 There is a systematic process for selecting evidence for outcomes or patient concerns to include in the PDA.                                                 |
|                                            | Appraise Evidence                                | 1/5 Evidence selected for inclusion in the PDA is critically appraised with a defined protocol.                                                                  |
| Phase 3<br>Presenting Evidence             | Articulate the Information                       | 1/5 The evidence (or evidentiary gaps) about potential benefits relevant to each option is summarized in balanced ways, not expected to bias the interpretation. |
|                                            | Manage COI                                       | 1/3 The conflicts of interest of people who summarize evidence are collected again before publishing the PDA.                                                    |
|                                            | Report                                           | 1/4 The methods used to translate evidence to risk communication formats are reported.                                                                           |
|                                            | Review                                           | 1/1 The PDA is reviewed externally.                                                                                                                              |
| Phase 4<br>Updating                        | Update                                           | 1/1 The PDA content is updated when new evidence becomes available.                                                                                              |

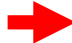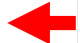

1  
2  
3  
4  
5  
6  
7  
8  
9  
10  
11  
12  
13  
14  
15  
16  
17  
18  
19  
20  
21  
22  
23  
24  
25  
26  
27  
28  
29  
30  
31  
32  
33  
34  
35  
36  
37  
38  
39  
40  
41  
42  
43  
44  
45  
46  
47  
48  
49  
50  
51  
52  
53  
54  
55  
56  
57  
58  
59  
60

Feel free to [click here](#) to view a visualization of the proposed Phases, Steps and Criteria in a separate window while you complete the questions below.

Do you have any comments or suggestions on the Step below? If so, please share them.

• **Step 1: Articulate the Information**

The proposed Criteria for this step are below. Please indicate whether each Criterium should be omitted, or whether it is a possible candidate for inclusion, a desirable candidate for inclusion or is essential for inclusion.

|                                                                                                                                                              | Omit                  | Possible              | Essential             |
|--------------------------------------------------------------------------------------------------------------------------------------------------------------|-----------------------|-----------------------|-----------------------|
| The evidence (or evidentiary gaps) about potential benefits relevant to each option is summarized in balanced ways, not expected to bias the interpretation. | <input type="radio"/> | <input type="radio"/> | <input type="radio"/> |
| The evidence (or evidentiary gaps) about potential harms relevant to each option is summarized in balanced ways, not expected to bias the interpretation.    | <input type="radio"/> | <input type="radio"/> | <input type="radio"/> |
| The evidence (or evidentiary gaps) is summarized in ways that are easy to understand.                                                                        | <input type="radio"/> | <input type="radio"/> | <input type="radio"/> |
| The certainty of the evidence is described in ways that are easy to understand.                                                                              | <input type="radio"/> | <input type="radio"/> | <input type="radio"/> |
| The evidence summarization process is described in ways that are easy to understand.                                                                         | <input type="radio"/> | <input type="radio"/> | <input type="radio"/> |
| The funding used to summarize the evidence (and develop the PDA) is reported.                                                                                | <input type="radio"/> | <input type="radio"/> | <input type="radio"/> |

Do you have any comments or suggestions on the wording or order of any of the Criteria above? If so, please share them.



Do you have any suggestions for additional Criteria to include in this Step? If so, please share them.

## PROPOSED PHASE 3 STEP 2

# Proposed Phases, Steps and Criteria

For the Evidence Summarization of Patient Decision Aids

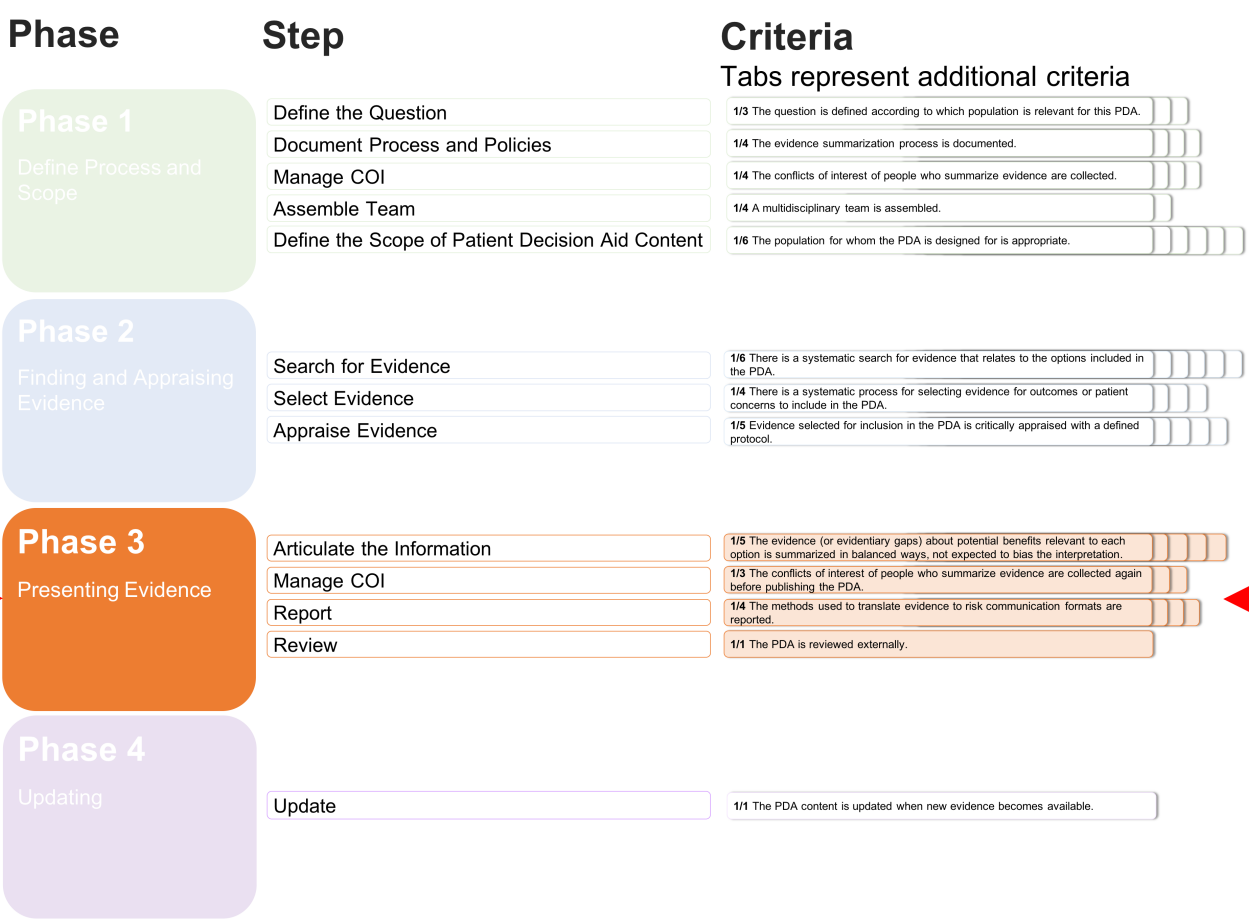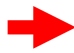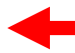

Feel free to [click here](#) to view a visualization of the proposed Phases, Steps and Criteria in a separate window while you complete the questions below.

1  
2 Do you have any comments or suggestions on the Step below? If so, please share  
3 them.  
4

5  
6  
7 • **Step 2: Manage COI**  
8

9  
10  
11   
12

13  
14  
15 The proposed Criteria for this step are below. Please indicate whether each  
16 Criterium should be omitted, or whether it is a possible candidate for inclusion,  
17 a desirable candidate for inclusion or is essential for inclusion.  
18  
19

20  
21  
22 Omit Possible E

23  
24 The conflicts of interest of people who summarize evidence are  
25 collected again before publishing the PDA.

26

27 Any change to the conflicts of interest of people who summarize  
28 evidence are reported.

29

30 Actions are taken to manage relevant conflicts of interest.

31

32  
33  
34  
35 Do you have any comments or suggestions on the wording or order of any of the  
36 Criteria above? If so, please share them.  
37

38  
39   
40

41  
42  
43  
44 Do you have any suggestions for additional Criteria to include in this Step? If so,  
45 please share them.  
46

47  
48   
49

50  
51  
52  
53 **PROPOSED PHASE 3 STEP 3**  
54  
55  
56  
57  
58  
59

# Proposed Phases, Steps and Criteria

## For the Evidence Summarization of Patient Decision Aids

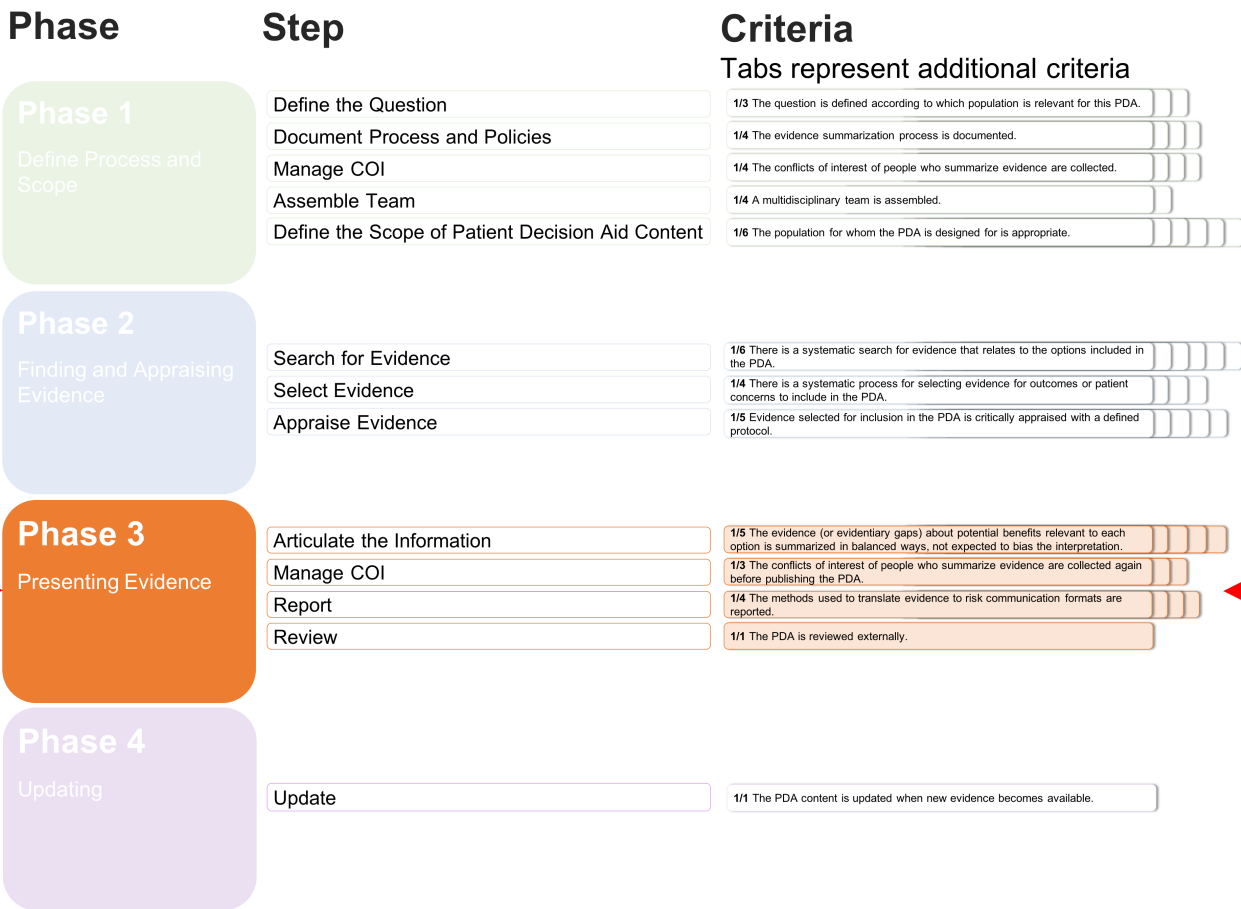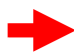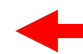

Feel free to [click here](#) to view a visualization of the proposed Phases, Steps and Criteria in a separate window while you complete the questions below.

Do you have any comments or suggestions on the Step below? If so, please share them.

- **Step 3: Report**

The proposed Criteria for this step are below. Please indicate whether each Criterium should be omitted, or whether it is a possible candidate for inclusion, a desirable candidate for inclusion or is essential for inclusion.

Omit Possible E

The methods used to translate evidence to risk communication formats are reported.

The approach to readability of summarized evidence is reported.

The summarization process is reported publicly.

The conflict of interest of people who summarize evidence are reported publicly.

Do you have any comments or suggestions on the wording or order of any of the Criteria above? If so, please share them.

Do you have any suggestions for additional Criteria to include in this Step? If so, please share them.

## PROPOSED PHASE 3 STEP 4

1  
2  
3  
4  
5  
6  
7  
8  
9  
10  
11  
12  
13  
14  
15  
16  
17  
18  
19  
20  
21  
22  
23  
24  
25  
26  
27  
28  
29  
30  
31  
32  
33  
34  
35  
36  
37  
38  
39  
40  
41  
42  
43  
44  
45  
46  
47  
48  
49  
50  
51  
52  
53  
54  
55  
56  
57  
58  
59  
60

# Proposed Phases, Steps and Criteria

## For the Evidence Summarization of Patient Decision Aids



Feel free to [click here](#) to view a visualization of the proposed Phases, Steps and Criteria in a separate window while you complete the questions below.

Do you have any comments or suggestions on the Step below? If so, please share them.

- **Step 4: Review**

The proposed Criteria for this step are below. Please indicate whether each criterium should be omitted, or whether it is a possible candidate for inclusion, a desirable candidate for inclusion or is essential for inclusion.

Omit F

The PDA is reviewed externally.

Do you have any comments or suggestions on the wording or order of any of the Criteria above? If so, please share them.

Do you have any suggestions for additional Criteria to include in this Step? If so, please share them.

### Phase 4

## PROPOSED PHASE 4

# Proposed Phases, Steps and Criteria

For the Evidence Summarization of Patient Decision Aids

| Phase                                             | Step                                             | Criteria                                                                                                                                                         |
|---------------------------------------------------|--------------------------------------------------|------------------------------------------------------------------------------------------------------------------------------------------------------------------|
| <b>Phase 1</b><br>Define Process and Scope        | Define the Question                              | 1/3 The question is defined according to which population is relevant for this PDA.                                                                              |
|                                                   | Document Process and Policies                    | 1/4 The evidence summarization process is documented.                                                                                                            |
|                                                   | Manage COI                                       | 1/4 The conflicts of interest of people who summarize evidence are collected.                                                                                    |
|                                                   | Assemble Team                                    | 1/4 A multidisciplinary team is assembled.                                                                                                                       |
|                                                   | Define the Scope of Patient Decision Aid Content | 1/6 The population for whom the PDA is designed for is appropriate.                                                                                              |
| <b>Phase 2</b><br>Finding and Appraising Evidence | Search for Evidence                              | 1/6 There is a systematic search for evidence that relates to the options included in the PDA.                                                                   |
|                                                   | Select Evidence                                  | 1/4 There is a systematic process for selecting evidence for outcomes or patient concerns to include in the PDA.                                                 |
|                                                   | Appraise Evidence                                | 1/5 Evidence selected for inclusion in the PDA is critically appraised with a defined protocol.                                                                  |
| <b>Phase 3</b><br>Presenting Evidence             | Articulate the Information                       | 1/5 The evidence (or evidentiary gaps) about potential benefits relevant to each option is summarized in balanced ways, not expected to bias the interpretation. |
|                                                   | Manage COI                                       | 1/3 The conflicts of interest of people who summarize evidence are collected again before publishing the PDA.                                                    |
|                                                   | Report                                           | 1/4 The methods used to translate evidence to risk communication formats are reported.                                                                           |
|                                                   | Review                                           | 1/1 The PDA is reviewed externally.                                                                                                                              |
| <b>Phase 4</b><br>Updating                        | Update                                           | 1/1 The PDA content is updated when new evidence becomes available.                                                                                              |

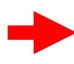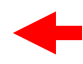

Feel free to [click here](#) to view a visualization of the proposed Phases, Steps and Criteria in a separate window while you complete the questions below.

Do you have any comments or suggestions on the Phase below? If so, please share them.

- Phase 4: Updating**

1 Do you have any comments or suggestions on the Step below. If so, please share  
2 them.  
3  
4

5 • **Step 1: Update**  
6  
7

8  
9

10  
11  
12  
13 **PROPOSED PHASE 4 STEP 1**  
14  
15

16  
17  
18  
19 **Proposed Phases, Steps and Criteria**

20 For the Evidence Summarization of Patient Decision Aids  
21  
22

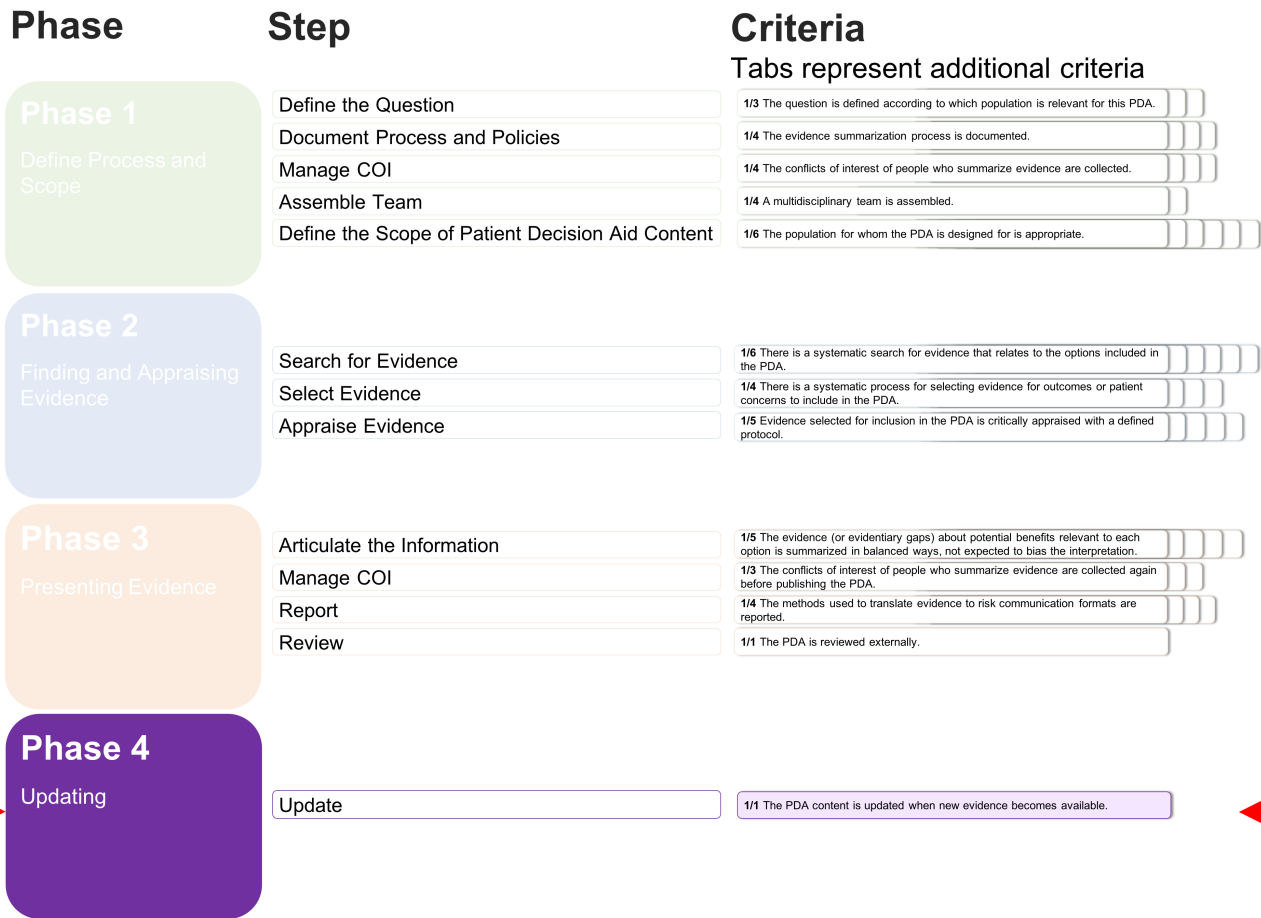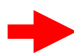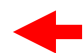



1 Feel free to [click here](#) to view a visualization of the proposed Phases, Steps and  
2 Criteria in a separate window while you complete the questions below.  
3  
4

5  
6 Do you have any comments or suggestions on the Step below? If so, please share  
7 them.  
8

9  
10 • **Step 1: Update**  
11

12  
13  
14   
15

16  
17  
18  
19 The proposed Criteria for this step are below. Please indicate whether each criterium  
20 should be omitted, or whether it is a possible candidate for inclusion,  
21 a desirable candidate for inclusion or is essential for inclusion.  
22  
23

24  
25 Omit Possible I

26  
27 The PDA content is updated when new evidence becomes  
28 available.  
29

30

31  
32  
33 Do you have any comments or suggestions on the wording of the criterion above? If  
34 so, please share them.  
35

36  
37   
38

39  
40  
41  
42 Do you have any suggestions for additional criteria to include in this Step? If so,  
43 please share them.  
44

45  
46   
47  
48

49  
50  
51  
52  
53 Powered by Qualtrics  
54

---

**Supplementary File 3: Proposed Phases, Steps, and Criteria**

| Existing standard<br>(from IOM & USPSTF) | Phase                                            | Step                                                                                                               | Criteria                                                                                           |
|------------------------------------------|--------------------------------------------------|--------------------------------------------------------------------------------------------------------------------|----------------------------------------------------------------------------------------------------|
| Establishing transparency                | Phase I: Define Process and Scope                | Define the question                                                                                                | The question is defined according to which population is relevant for this PDA.                    |
|                                          |                                                  |                                                                                                                    | The question is defined according to which options are relevant for this PDA.                      |
|                                          |                                                  |                                                                                                                    | The question is defined according to which outcomes or patient concerns are relevant for this PDA. |
|                                          |                                                  | Document process and policies                                                                                      | The evidence summarization process is documented.                                                  |
|                                          |                                                  |                                                                                                                    | The evidence summarization process minimizes bias.                                                 |
|                                          |                                                  |                                                                                                                    | The evidence summarization process minimizes conflicts of interest.                                |
|                                          |                                                  |                                                                                                                    | The conflict of interest policy applying to people who summarize evidence is documented.           |
| Management of conflict of interest       | Manage COI                                       | The conflicts of interest of people who summarize evidence are collected.                                          |                                                                                                    |
|                                          |                                                  | Actions are taken to manage relevant conflicts of interest.                                                        |                                                                                                    |
|                                          |                                                  | The actions taken on relevant conflicts of interest are documented.                                                |                                                                                                    |
|                                          |                                                  | Conflicts of interest are monitored over the course of PDA development.                                            |                                                                                                    |
| Guideline development group composition  | Assemble team                                    | A multidisciplinary team is assembled.                                                                             |                                                                                                    |
|                                          |                                                  | The team comprises clinicians.                                                                                     |                                                                                                    |
|                                          |                                                  | The team comprises methodological experts.                                                                         |                                                                                                    |
|                                          |                                                  | The team comprises patient or consumer representatives.                                                            |                                                                                                    |
|                                          | Define the scope of patient decision aid content | The population for whom the PDA is designed for is appropriate.                                                    |                                                                                                    |
|                                          |                                                  | There is a systematic process to reduce bias in the definition of the population for the PDA.                      |                                                                                                    |
|                                          |                                                  | The options for inclusion in the PDA are appropriate for the intended population.                                  |                                                                                                    |
|                                          |                                                  | There is a systematic process to reduce bias in the definition of the options for the PDA.                         |                                                                                                    |
|                                          |                                                  | The outcomes or patient concerns for inclusion in the PDA are appropriate for the intended population and options. |                                                                                                    |

|                                                                         |                                         |                            |                                                                                                                                                                           |
|-------------------------------------------------------------------------|-----------------------------------------|----------------------------|---------------------------------------------------------------------------------------------------------------------------------------------------------------------------|
|                                                                         |                                         |                            | There is a systematic process to reduce bias in the definition of the outcomes or patient concerns for the PDA.                                                           |
| Guideline and systematic review intersection                            | PHASE II: Finding & Appraising Evidence | Search for evidence        | There is a systematic search for evidence that relates to the options included in the PDA.                                                                                |
|                                                                         |                                         |                            | There is a systematic search for evidence that relates to the outcomes or patient concerns included in the PDA.                                                           |
|                                                                         |                                         |                            | If the PDA is customizable to individual patient factors, there is a systematic search for evidence of how individual patient factors influence the expected outcomes.    |
| Establishing evidence foundations and rating strength of recommendation |                                         | Select evidence            | There is a systematic process for selecting evidence for outcomes or patient concerns to include in the PDA (where evidence is not available, can directly ask patients). |
|                                                                         |                                         |                            | There is a systematic process for selecting evidence (or evidentiary gaps) about potential benefits relevant to each option.                                              |
|                                                                         |                                         |                            | There is a systematic process for selecting evidence (or evidentiary gaps) about potential harms relevant to each option.                                                 |
|                                                                         |                                         |                            | If the PDA is customizable to individual patient factors, there is a systematic process for selecting relevant risk predictors to include in the PDA.                     |
|                                                                         |                                         | Appraise evidence          | Evidence selected for inclusion in the PDA is critically appraised with a defined protocol (such as GRADE).                                                               |
|                                                                         |                                         |                            | The protocol for critical appraisal of evidence accounts for risks of bias in study design.                                                                               |
|                                                                         |                                         |                            | The protocol for critical appraisal of evidence accounts for risks of bias in study analysis and reporting.                                                               |
| Articulation of information                                             | PHASE III: Presenting Evidence          | Articulate the information | The evidence (or evidentiary gaps) about potential benefits relevant to each option is summarized in balanced ways, not expected to bias the interpretation.              |
|                                                                         |                                         |                            | The evidence (or evidentiary gaps) about potential harms relevant to each option is summarized in balanced ways, not expected to bias the interpretation.                 |

|          |                                   |            |                                                                                                           |
|----------|-----------------------------------|------------|-----------------------------------------------------------------------------------------------------------|
|          |                                   |            | The evidence (or evidentiary gaps) is summarized in ways that are easy to understand.                     |
|          |                                   |            | The certainty of the evidence is described in ways that are easy to understand.                           |
|          |                                   |            | The evidence summarization process is described in ways that are easy understand.                         |
|          |                                   |            | The funding used to summarize the evidence (and develop the PDA) is reported.                             |
|          |                                   | Manage COI | The conflicts of interest of people who summarize evidence are collected again before publishing the PDA. |
|          |                                   |            | Any change to the conflicts of interest of people who summarize evidence are reported.                    |
|          |                                   |            | Actions are taken to manage relevant conflicts of interest.                                               |
|          |                                   | Report     | The methods used to translate evidence to risk communication formats are reported.                        |
|          |                                   |            | The approach to readability of summarized evidence is reported.                                           |
|          |                                   |            | The summarization process is reported publicly.                                                           |
|          |                                   |            | The conflict of interest of people who summarize evidence are reported publicly.                          |
|          |                                   | Review     | The PDA is reviewed externally.                                                                           |
| Updating | PHASE IV: Post-publication update | Update     | The PDA content is updated when new evidence becomes available.                                           |

1  
2  
3  
4  
5  
6  
7  
8  
9  
10  
11  
12  
13  
14  
15  
16  
17  
18  
19  
20  
21  
22  
23  
24  
25  
26  
27  
28  
29  
30  
31  
32  
33  
34  
35  
36  
37  
38  
39  
40  
41  
42  
43  
44  
45  
46  
47

# BMJ Open

## Study protocol: A modified Delphi survey for the evidence summarization of patient decision aids

|                                 |                                                                                                                                                                                                                                                                                                                                                                                                                                                                                                                                                                                                                                                                                                                     |
|---------------------------------|---------------------------------------------------------------------------------------------------------------------------------------------------------------------------------------------------------------------------------------------------------------------------------------------------------------------------------------------------------------------------------------------------------------------------------------------------------------------------------------------------------------------------------------------------------------------------------------------------------------------------------------------------------------------------------------------------------------------|
| Journal:                        | <i>BMJ Open</i>                                                                                                                                                                                                                                                                                                                                                                                                                                                                                                                                                                                                                                                                                                     |
| Manuscript ID                   | bmjopen-2018-026701.R1                                                                                                                                                                                                                                                                                                                                                                                                                                                                                                                                                                                                                                                                                              |
| Article Type:                   | Protocol                                                                                                                                                                                                                                                                                                                                                                                                                                                                                                                                                                                                                                                                                                            |
| Date Submitted by the Author:   | 13-Dec-2018                                                                                                                                                                                                                                                                                                                                                                                                                                                                                                                                                                                                                                                                                                         |
| Complete List of Authors:       | Durand, Marie-Anne; The Dartmouth Institute for Health Policy & Clinical Practice,<br>Dannenberg, Michelle; Dartmouth College, The Dartmouth Institute for Health Policy and Clinical Practice<br>Saunders, Catherine; Dartmouth College, The Dartmouth Institute for Health Policy & Clinical Practice<br>Giguere, Anik; Universite Laval Faculte de medecine<br>Alper, Brian; EBSCO Health, DynaMed Plus; University of Missouri Columbia School of Medicine, Family and Community Medicine<br>Hoffmann, Tammy; Bond University,<br>Perestelo-Pérez, L; Evaluation Unit of the Canary Islands Health Service<br>Campbell, Stephen; Dartmouth College Geisel School of Medicine<br>Elwyn, Glyn; Dartmouth College, |
| <b>Primary Subject Heading</b>: | Communication                                                                                                                                                                                                                                                                                                                                                                                                                                                                                                                                                                                                                                                                                                       |
| Secondary Subject Heading:      | Evidence based practice                                                                                                                                                                                                                                                                                                                                                                                                                                                                                                                                                                                                                                                                                             |
| Keywords:                       | Decision Making, Delphi Technique, Patient Preference, Patient-Centered Care, Surveys and Questionnaires                                                                                                                                                                                                                                                                                                                                                                                                                                                                                                                                                                                                            |
|                                 |                                                                                                                                                                                                                                                                                                                                                                                                                                                                                                                                                                                                                                                                                                                     |

SCHOLARONE™  
Manuscripts

## Study protocol: A modified Delphi survey for the evidence summarization of patient decision aids

Running heading: Evidence summarization Delphi survey

### Authors:

Marie-Anne Durand<sup>1</sup>

Michelle D. Dannenberg<sup>2</sup>

Catherine H. Saunders<sup>3</sup>

Anik Giguère<sup>4</sup>

Brian S. Alper<sup>5</sup>

Tammy Hoffmann<sup>6</sup>

Lilisbeth Perestelo-Perez<sup>7</sup>

Stephen T. Campbell<sup>8</sup>

Glyn Elwyn<sup>9</sup>

- 1 Associate Professor  
The Preference Laboratory  
The Dartmouth Institute for Health Policy & Clinical Practice  
One Medical Center Drive, Lebanon, NH 03766, United States
- 2 Research Assistant/Research Coordinator  
The Preference Laboratory  
The Dartmouth Institute for Health Policy & Clinical Practice  
One Medical Center Drive, Lebanon, NH 03766, United States
- 3 Doctoral Student  
The Preference Laboratory  
The Dartmouth Institute for Health Policy & Clinical Practice  
One Medical Center Drive, Lebanon, NH 03766, United States
- 4 Associate Professor  
Department of Family Medicine  
Université Laval, C.A.  
2325 Rue de l'Université, Québec, QC G1V 0A6, Canada
- 5 Vice President of Innovations and EBM Development  
EBSCO Health Innovations, Department of Innovations and EBM Development  
10 Estes Street, Ipswich, MA 01938, United States
- 6 Professor of Clinical Epidemiology  
Centre for Research in Evidence-Based Practice (CREBP)  
Faculty of Health Sciences & Medicine  
Level 2, Building 5, Faculty of Health Sciences & Medicine, Bond University  
14 University Dr, Robina QLD 4226, Australia
- 7 Researcher  
Evaluation AND Planning Unit – Directorate of the Canary Islands Health Service  
Camino de Candelaria s/n. El Chorrillo  
38109

1  
2 El Rosario, Spain

3 8 Patient Partner

4 The Dartmouth Institute for Health Policy & Clinical Practice  
5 One Medical Center Drive, Lebanon, NH 03766, United States  
6

7  
8 9 Professor

9 The Preference Laboratory  
10 The Dartmouth Institute for Health Policy & Clinical Practice  
11 One Medical Center Drive, Lebanon, NH 03766, United States  
12  
13  
14  
15  
16  
17

18 Correspondence to: Marie-Anne Durand:

19 Phone: 603-653-0851

20 Email: marie-anne.durand@dartmouth.edu

21 Address: The Preference Laboratory

22 The Dartmouth Institute for Health Policy & Clinical Practice  
23 Level 5, Williamson Translational Research Building  
24 One Medical Center Drive  
25 Lebanon, NH 03756  
26  
27

28  
29 Keywords

30 [Decision Making](#)

31 [Delphi Technique](#)

32 [Patient Preference](#)

33 [Patient-Centered Care](#)

34 [Surveys and Questionnaires](#)  
35  
36  
37  
38  
39  
40  
41  
42  
43  
44  
45  
46  
47  
48  
49  
50  
51  
52  
53  
54  
55  
56  
57  
58  
59  
60

## ABSTRACT FOR PROTOCOL

### Introduction

Information included in a Patient Decision Aid (PDA) can significantly influence patients' decisions and is, therefore, expected to be evidence based and rigorously selected and summarized. Yet patient decision aid developers have not yet agreed on a standardized process for the selection and summarization of the supporting evidence. We intend to generate consensus on a process (and related steps and criteria) for selecting and summarizing evidence for patient decision aids using a modified Delphi survey.

### Methods and Analysis

We will develop an evidence summarization process specific to PDA development by using a consensus-based Delphi approach, surveying international experts and stakeholders with two to three rounds. To increase generalizability and acceptability, we will distribute the survey to the following stakeholder groups: patient decision aid developers, researchers with expertise in shared decision making, patient decision aid development and evidence summarization, members of the International Patient Decision Aid Standards group, policy makers with expertise in patient decision aid certification, and patient stakeholder groups. For each criterion, if at least 80% of survey participants rank the criterion as most important/least important, we will consider consensus achieved.

### Ethics and Dissemination

It is critical for patient decision aids to have accurate and trustworthy evidence-based information about the risks and benefits of health treatments and tests, as these decision aids help patients make important choices. We want to generate consensus on an approach for selecting and summarizing the evidence included in patient decision aids, which can be widely implemented by decision aid developers. Dartmouth College's Committee for the Protection of Human Subjects approved this protocol. We will publish our results in a peer-reviewed journal.

Words: 265

### Article Summary

- Gap: There is no standardized method for selecting and summarizing the evidence in patient decision aids.
- Solution: We're developing a process to ensure patient decision aids have the most up-to-date, trustworthy evidence available.
- Clinical implications: This will help patients and clinicians know they can trust the information in patient decision aids, so they can make the best decisions together.
- Health systems implications: Knowing that the evidence selection and summarization process is rigorous, healthcare systems may feel more comfortable including patient decision aids in routine care.
- Strengths: Systematic involvement of patient stakeholders.
- Limitations: Limitations of online surveys include selection bias.



## INTRODUCTION

Patient Decision Aids (PDAs) are tools that help patients and their clinicians make preference-sensitive decisions together. They are typically defined as: “evidence-based tools designed to help patients make specific and deliberated choices among healthcare options. Patient decision aids supplement (rather than replace) clinicians' counselling about options”[1][2]. They promote patient engagement in medical decision making, collaboration between patients and their care team, increase knowledge and align patients' choices with their preferences [1]. Therefore, the information included in PDAs can significantly impact patients' decisions. For this reason, patients and clinicians expect the information in PDAs to be evidence based and rigorously selected and summarized.

The approach that PDA developers use to select and summarize the evidence in PDAs, however, appears inconsistent. A recent international cross sectional survey of 15 PDA developers confirms that they do not have an agreed-upon, standardized process to select and summarize evidence. They also do not always document the evidence selection and summarization process [3]. Most organizations reported using existing systematic reviews and clinical practice guidelines to select and summarize information for PDAs. Less than half reported using a standard, documented approach to guide the evidence selection and summarization. When the approach was documented, the documents offered varying levels of detail. Common evidence summarization steps identified were: tool-relevant question formation, search strategies, evidence appraisals, and updating policies. There was no standardized process across organizations to summarize evidence for PDAs. Although agreed-upon approaches and tested methods for evidence summarization exist in other areas, such as clinical practice guidelines, there is no agreed process (including steps and criteria within each step) for the selection and summarization of evidence for PDAs.

The International Patient Decision Aids Standards (IPDAS) collaboration developed criteria for assessing the quality of PDAs [4]. These criteria are also used by PDA producers to guide the development of the interventions. However, only six items of the IPDAS checklist cover the selection and summarization of evidence, and do not provide any guidance about recommended methods for the evidence selection and summarization of PDAs [4]. A 2013 review of the literature conducted by the IPDAS working group on the synthesis of scientific evidence highlighted the importance of rigorously selecting and summarizing evidence used to populate a patient decision aid. They did not provide clear practical guidance on how to conduct evidence summarization for the development of patient decision aids except recommending that developers apply the GRADE methodology [5]. Further, the IPDAS instrument and the IPDAS minimum standards do not offer additional information or guidance on the steps required to select and summarize evidence-based information for PDAs [6][7]. Other efforts to evaluate or certify the quality of PDAs have emerged [8], but none of those standards or certification bodies describe recommended methods and criteria that PDAs producers should follow when selecting and summarizing evidence for patient-facing interventions.

Evidence summarization in other medical contexts is increasingly standardized, such as the selection and summarization of evidence for clinical practice guidelines and systematic reviews. This process promotes transparency, rigor, and minimizes the risk of bias in the end product [2] [9][10][11][12][13][14][15][16][17]. The same level of scrutiny is justified when developing PDAs, as they may directly influence patient care and decision making. Tasks such as the selection and

1 identification of patient-relevant outcomes, analysis of patient concerns and priorities, description of  
2 the quality of evidence, and communication of uncertainty in ways that patients understand warrants  
3 the development of an agreed process and related steps and criteria that are specific to PDAs. For  
4 those reasons, it would not be appropriate to apply evidence summarization processes developed for  
5 clinical guidelines without integrating the evidence summarization steps and components that are  
6 specific to the development of interventions that target patients. The target group, scope and content  
7 differ significantly enough from clinical practice guidelines development, thus requiring a tailored  
8 evidence summarization process. Additionally, the IPDAS standards impose some prerequisites on the  
9 evidence summarization process on which the decision aid will be based. For example, IPDAS requires  
10 that the decision aid summarizes the evidence regarding all health options available to a patient facing  
11 a specific health problem, and that decision aids present positive and negative features of each option  
12 with an equal amount of details, among other specificities [18]. Efforts to develop an agreed evidence  
13 summarization process for PDAs should incorporate the substantial body of related evidence  
14 summarization guidance previously developed by other groups, and notably for clinical practice  
15 guidelines previously mentioned [11].

### 21 **Objective**

22 The purpose of the study is to generate consensus on a process (and related steps and criteria) for  
23 selecting and summarizing evidence for patient decision aids using a modified Delphi survey. This will  
24 in turn improve transparency, rigor and minimize the risk of bias of the evidence summarization  
25 processes leading to the development of patient decision aids.

## 28 **2 METHODS**

### 31 **Study Design and Procedures**

32 We will develop an evidence summarization process specific to PDA development by using a  
33 consensus-based Delphi approach previously used in the development of a quality criteria framework  
34 for PDAs [2] [19]. Consensus methods can harness the views of international experts on a wide range  
35 of information and questions in order to make decisions that are based on expert consensus [20]. We  
36 will conduct a multi-round modified Delphi survey (two to three rounds). Compared to the nominal  
37 group technique, it is the most practical and scalable method to obtain feedback from a large number  
38 of stakeholders in different geographic locations. During the multiple rounds of online questionnaires,  
39 relevant stakeholders will be consulted to provide feedback about the evolving set of evidence  
40 summarization steps and criteria. The anonymous responses from participants will be fed back to them  
41 in subsequent rounds. Depending on the level of consensus after two rounds (see Data Analysis  
42 section), we will determine whether to conduct a third survey round.

### 47 **Study Management**

48 To oversee the tasks of 1) generating an initial set of criteria for the Delphi process and 2) managing  
49 the Delphi survey distribution and analysis, we convened a steering group. This group will oversee the  
50 project and will make strategic decisions about the study design, data collection and analysis  
51 processes, as well as agree a final process and related set of steps and criteria. An invitation to join this  
52 group was posted on social media (Shared@Shared Decision Making Network Facebook group: 745  
53 members) on 30 June 2017. The post invited all Facebook group members to join an in-person meeting  
54 about evidence summarization during the International Shared Decision Making conference, held in  
55 Lyon, France, between July 2, and July 5, 2017. For those who were not able to join the meeting but  
56  
57  
58  
59

1 expressed an interest in evidence summarization of PDAs, a high-level summary was posted on  
2 Facebook. The steering group was convened in September 2017. The study steering group includes  
3 nine international experts in PDA development, evaluation and implementation, evidence  
4 summarization and clinical practice guidelines, and one patient representative. Six steering group  
5 members are based in the US, one in Canada, one in Australia and one in Spain Google drive and  
6 video-conferencing facilities will be used to facilitate the exchange and review of information and  
7 documents, virtual meetings, as well as real-time collaboration and version-control.  
8  
9

## 10 11 **Participants**

12 To maximize the generalizability and applicability of the criteria, we plan to invite participation in the  
13 survey from the following groups: 1) all known developers of PDAs who created or updated a tool  
14 within last five calendar years (using existing inventory), 2) all members of the of the IPDAS group, 3)  
15 the Shared Decision Making listserv; 4) the Society for Participatory Medicine listserv ; 5) an  
16 overdiagnosis google group ; 6) the evidence-based healthcare listserv ; 7) the Society for Medical  
17 Decision Making ; the 8) the Society of Behavioral Medicine (Health Decision Making Interest Group) ,  
18 9) HTAi-ISG Patient Involvement listserv, 10) GRADE Working group, 11) the Guidelines International  
19 Network, 12) convenience sample of policy makers with interest and expertise in PDA certification; 13)  
20 the BMJ patient group; 14) the ProPublica Patient Safety Community. We have no other eligibility  
21 criteria.  
22  
23  
24

25  
26 For all participants, the survey invitation (Supplementary File 1) will provide a brief outline of the  
27 study, a link to the online survey (Supplementary File 2), and a brief participant information sheet as  
28 the first page of the survey. Consent will be inferred by participants' completion of the survey. The  
29 ethics application form and protocol were submitted to Dartmouth College's committee for the  
30 protection of human subjects on 27 April 2018. Approval was granted on 23 May 2018  
31 (STUDY00031042).  
32  
33

34  
35 In order not to contaminate the Delphi survey results and express their views twice (in developing the  
36 original items and taking the surveys), the steering group members have unanimously decided not to  
37 complete the Delphi surveys.  
38

## 39 **Patient and Public Involvement**

### 40 **Design**

41 Our patient partner, SC, was involved in the development of the Delphi survey and provided  
42 meaningful feedback on iterative drafts of the online questionnaire. SC is a core member of our study  
43 steering group and an author on this manuscript.  
44  
45

### 46 **Participants**

47 We also plan to make a concerted effort to recruit patient participants. We will reach out to online  
48 patient groups, including the BMJ Patient group, the ProPublica Patient Safety Community (more than  
49 6,000 members). We will also engage a patient and family advisor group at Dartmouth-Hitchcock  
50 Medical Center.  
51  
52

### 53 **Analysis**

54 Our patient partner will be a critical part of our analysis team, and will be involved in all steering group  
55 meetings.  
56  
57  
58

## Survey Development

The main output of the original Lyon evidence summarization meeting was the creation of a spreadsheet that detailed all evidence-summarization steps inherent to PDA development. The first draft of this spreadsheet, iteratively developed by the steering group members, included 18 criteria. Combining those 18 criteria with the eight existing standards for the summarization of clinical practice guidelines as outlined by the National Academy of Medicine (formerly IOM) & US Preventive Services Task Force Standards led to the creation of the first draft of the proposed process and steps. This draft was shared in a Google doc with all members of the steering group and iteratively refined and finalized. Three separate iterations of the process (phases, steps and criteria) were created, reviewed and discussed by the steering group members until no additional revisions were suggested. A final internal version of the criteria (n=48), categorized into four phases and 13 steps was finalized in April 2018 (see Supplementary File 3).

## Data Collection

### Round One Survey

The round one survey will include a brief information page and a summary of the process that led to the development of the phases, steps and criteria. Participants will be asked to provide their input on the phases, steps and criteria (including inclusion, wording, grouping, order and any other comments). Specifically, they will be asked to indicate using a four-point Likert scale (omit, possible, desirable, essential) whether each criterion included in the proposed process should be omitted or kept (and whether it is considered possible, desirable or essential). The criteria will be grouped into relevant phases and steps. For each phase and for each step, participants will be given the opportunity to provide rewording suggestions, suggest additional phases, steps or criteria, comment on the order of those elements or provide additional comments, or questions. Email addresses will be collected so participants can participate in further rounds. At the end of each round, we will confirm participants' interest to participate in the next round. Participants will also be asked to complete basic demographic questions. Each round of the survey will be open for three weeks, and two reminders will be sent.

### Round Two Survey (and round three, as necessary)

Round one participants will be invited to complete a second survey, in which feedback will be provided about the results of the first round (percentage of participants who thought a criterion should be included or excluded) and about the changes made based on the qualitative feedback. Participants will be invited to indicate whether to omit or include (omit, possible, desirable, essential) the items, including the new items proposed by participants in the first round, and to provide additional rewording suggestions, comments, or questions. As mentioned above, the survey will be open for three weeks, and two email reminders will be sent. Depending on the level of consensus (see data analysis section), a third round may be conducted. This will be determined by the steering group after round 2 data analysis is completed.

## Data Analysis

Following round one, the ratings will be summarized using percentages and the views of all participants will be given equal weight. If at least 80% of participants rate the item in the lower two categories (omit, possible) or in the higher two categories (desirable, essential), we will consider consensus to be achieved and the item will be removed or retained, respectively. Items where ratings

1 do not meet the consensus threshold and conflict with open text comments will be grouped together  
2 and explained to round 2 participants. They will be asked to re-rate those items taking the qualitative  
3 feedback into account. Following the first survey round, a consensus meeting involving the steering  
4 group will be held. The steering group will review and discuss the ratings and qualitative feedback  
5 received, including rewording suggestions per criterion, suggestions to add new phases, steps or  
6 criteria and more general comments or questions. The wording or order of the phases, steps or criteria  
7 will be revised if two or more respondents suggest it or if the steering group members agree that the  
8 phase, step or criterion would benefit from rewording, reordering or merging.  
9  
10  
11

12 Following the second survey round, a second consensus meeting will be held. Decisions on whether to  
13 conduct a third round and retain items in the scale will be made based on the ratings in the survey  
14 rounds and feedback/comments from participants. The ratings will be summarized using percentages  
15 and the views of all participants will be given equal weight. If at least 80% of participants rate the  
16 importance of the item in the lower two categories, or in the higher two categories, we will consider  
17 consensus to be achieved and the item will be removed or retained, respectively. If no consensus is  
18 achieved or the consensus ratings are contradicted by recurring open text comments, the steering  
19 group will decide whether or not to retain a criterion, basing this decision on qualitative feedback from  
20 the participants where possible, and the steering group's views. We have successfully used this  
21 approach before [21].  
22  
23  
24

25 Only complete surveys will be included in the analysis. We will report the amount of missing data in  
26 the manuscript reporting the results of the Delphi survey.  
27  
28

### 29 **Data Management and Safety**

30 Data to be collected include information about the participant's role as it relates to patient decision  
31 aids, general demographics, and their opinion of what to add/change/include in an evidence  
32 summarization process. We are careful to protect the identity of all study participants. We will store  
33 the data securely in accordance with standard human subject research protocols. All data will be  
34 retained for three years, per the Dartmouth College data retention policy (or for the period specified  
35 by journals in which arising manuscripts are published, if longer) and then destroyed securely.  
36  
37  
38

### 39 **DISCUSSION**

40 Patient decision aids must have accurate and trustworthy evidence-based information about the risks  
41 and benefits of health treatments and tests, as these tools help patients make important healthcare  
42 choices. We want to generate consensus on an approach for selecting and summarizing the evidence  
43 included in patient decision aids, which we hope can be widely adopted by decision aid developers.  
44  
45

### 46 **STRENGTHS AND LIMITATIONS**

47 A strength of this study is the systematic involvement of patients and relevant stakeholders in planning  
48 the modified Delphi survey. We plan to include a diverse sample of participant stakeholders including  
49 patients, researchers, patient decision aid developers and health policy makers. Limitations of online  
50 surveys always include the possibility of selection biases, meaning participants who opt to take the  
51 survey may be systematically different than the target population. In our case, the participants may be  
52 more engaged and more interested in the outcome of the Delphi survey. There is also a possibility that  
53 their views will be stronger than those who opted not to participate.  
54  
55  
56

### 57 **CONCLUSION**

1 Patients should be able to trust the information they receive from patient decision aids. Together with  
2 their clinicians, family and caregivers, they rely on these tools to make decisions that are aligned with  
3 their informed preferences. We believe standardizing a process for selecting and summarizing the  
4 evidence included in patient decision aids is therefore a worthwhile effort. Bringing all relevant  
5 stakeholders to the table - patients, researchers, patient decision aid developers, and healthcare policy  
6 makers - will ensure that the ultimate outcome is rigorous and rooted in consensus, to promote  
7 widespread adoption.  
8  
9  
10

### 11 **ETHICS AND DISSEMINATION**

12 Dartmouth College's Committee for the Protection of Human Subjects approved this protocol. We plan  
13 to publish our results in a peer-reviewed journal.  
14  
15

### 16 **FUNDING**

17 We did not receive funding for this project.  
18  
19

### 20 **COMPETING INTERESTS**

21 Glyn Elwyn and Marie-Anne Durand have developed the Option Grid patient decision aids, and EBSCO  
22 Information Services sells subscription access to Option Grid patient decision aids. They receive  
23 consulting income from EBSCO Health, and may receive royalties in the future. Glyn Elwyn and Marie-  
24 Anne Durand are consultant for ACCESS Community Health Network. Brian S. Alper is employed full-  
25 time by EBSCO Information Services which is a for-profit company that publishes patient decision aids.  
26 No other competing interests declared.  
27  
28  
29

### 30 **AUTHORSHIP CONTRIBUTIONS**

31 Marie-Anne Durand, Glyn Elwyn and Michelle D. Dannenberg planned and designed the study.  
32 Catherine H. Saunders, Anik Giguère, Brian S. Alper, Tammy Hoffmann, Lilisbeth Perestelo Perez and  
33 Stephen T. Campbell provided advice and guidance on the design. Marie-Anne Durand drafted the  
34 manuscript and all authors contributed to writing and approved the final draft of the manuscript.  
35  
36  
37  
38  
39  
40  
41  
42  
43  
44  
45  
46  
47  
48  
49  
50  
51  
52  
53  
54  
55  
56  
57  
58  
59  
60

## REFERENCES

- [1] D. Stacey, F. Légaré, K. Lewis, M.J. Barry, C.L. Bennett, K.B. Eden, M. Holmes-Rovner, H. Llewellyn-Thomas, A. Lyddiatt, R. Thomson, L. Trevena, F. Legare, N.F. Col, C.L. Bennett, M.J. Barry, K.B. Eden, M. Holmes-Rovner, H. Llewellyn-Thomas, A. Lyddiatt, R. Thomson, L. Trevena, J.H.C. Wu, F. Légaré, K. Lewis, M.J. Barry, C.L. Bennett, K.B. Eden, M. Holmes-Rovner, H. Llewellyn-Thomas, A. Lyddiatt, R. Thomson, L. Trevena, Decision aids for people facing health treatment or screening decisions, *Cochrane Database Syst. Rev.* 4 (2017) CD001431. doi:10.1002/14651858.CD001431.pub5.
- [2] G. Elwyn, A.M.A. O'Connor, D. Stacey, R. Volk, A.G.K.A.G. Edwards, A. Coulter, R. Thomas, A.L. Barratt, M. Barry, S.J. Bernstein, P.N. Butow, A. Clarke, V.A. Entwistle, D. Feldman-Stewart, M. Holmes-Rovner, A. Mulley, H.A. Llewellyn-Thomas, N. Moumjid, C. Ruland, K.R. Sepucha, A. Sykes, T. Whelan, R. Thomson, Developing a quality criteria framework for patient decision aids: online international Delphi consensus process, *BMJ.* 333 (2006) 417–423. doi:10.1136/bmj.38926.629329.AE.
- [3] M.D. Dannenberg, M.-A. Durand, V.M. Montori, C. Reilly, G. Elwyn, Existing evidence summarization methods cannot guarantee trustworthy patient decision aids., *J. Clin. Epidemiol.* 102 (2018) 69–77. doi:10.1016/j.jclinepi.2018.06.003.
- [4] G. Elwyn, A.M.A.M.A.M. O'Connor, C.L. Bennett, R.G.R.G.R.G. Newcombe, M. Politi, M.-A.M.M.-A. Durand, E. Drake, N. Joseph-Williams, S. Khangura, A. Saarimaki, S. Sivell, M. Stiel, S.J.S.J. Bernstein, N. Col, A. Coulter, K. Eden, M. Härter, M.H.M.H.M.H. Rovner, N. Moumjid, D. Stacey, R. Thomson, T. Whelan, T. van der Weijden, A.G.K.A. Edwards, O'Connor AM, Bennett C, Newcombe RG, Politi M, Durand MA, Drake E, Joseph-Williams N, Khangura S, Anton Saarimaki A, Stephanie Sivell S, Stiel M, Col N, Coulter A, Eden K, Holmes Rovner M, Moumjid N, Thomson R, Whelan T, van der Weijden T, A.G.K. Edward, A. Khangura, Assessing the quality of decision support technologies using the International Patient Decision Aid Standards instrument (IPDASi), *PLoS One.* 4 (2009) e4705. doi:10.1371/journal.pone.0004705.
- [5] V.M. Montori, A. LeBlanc, A. Buchholz, D.L. Stilwell, A. Tsapas, Basing information on comprehensive, critically appraised, and up-to-date syntheses of the scientific evidence: a quality dimension of the International Patient Decision Aid Standards., *BMC Med. Inform. Decis. Mak.* 13 Suppl 2 (2013) S5. doi:10.1186/1472-6947-13-S2-S5.
- [6] M.-A. Durand, J. Witt, N. Joseph-Williams, R.G. Newcombe, M.C. Politi, S. Sivell, G. Elwyn, Minimum standards for the certification of patient decision support interventions: Feasibility and application, *Patient Educ. Couns.* 98 (2015). doi:10.1016/j.pec.2014.12.009.
- [7] N. Joseph-Williams, R. Newcombe, M. Politi, M.-A. Durand, S. Sivell, D. Stacey, A. O'Connor, R.J. Volk, A. Edwards, C. Bennett, M. Pignone, R. Thomson, G. Elwyn, Toward Minimum Standards for Certifying Patient Decision Aids, *Med. Decis. Mak.* 34 (2014) 699–710. doi:10.1177/0272989X13501721.
- [8] A. WSHC, Patient decision aids certification 2018, (n.d.). <https://www.hca.wa.gov/about-hca/healthier-washington/patient-decision-aids-pdas>.
- [9] J.P.T. Higgins, S. Green, *Cochrane handbook for systematic reviews of interventions version 5.0. 2* [updated September 2009], The Cochrane Collaboration, York, 2009.
- [10] O.A. Schünemann H, Brożek J, Guyatt G, ed., *GRADE Handbook for Grading Quality of Evidence and Strength of Recommendations*, The GRADE Working Group, n.d. Available from [gdt.guidelinedevelopment.org/app/handbook/handbook.html](http://gdt.guidelinedevelopment.org/app/handbook/handbook.html).

- 1  
2 [11] A. Qaseem, F. Forland, F. Macbeth, G. Ollenschlager, S. Phillips, P. van der Wees, Guidelines  
3 International Network: toward international standards for clinical practice guidelines., *Ann.*  
4 *Intern. Med.* 156 (2012) 525–531. doi:10.7326/0003-4819-156-7-201204030-00009.
- 5 [12] Standards for systematic reviews 2011, n.d.  
6 [http://www.nationalacademies.org/hmd/Reports/2011/Finding-What-Works-in-Health-Care-](http://www.nationalacademies.org/hmd/Reports/2011/Finding-What-Works-in-Health-Care-Standards-for-Systematic-Reviews/Standards.aspx)  
7 [Standards-for-Systematic-Reviews/Standards.aspx](http://www.nationalacademies.org/hmd/Reports/2011/Finding-What-Works-in-Health-Care-Standards-for-Systematic-Reviews/Standards.aspx).
- 8 [13] D. Moher, A. Liberati, J. Tetzlaff, D.G. Altman, Preferred reporting items for systematic reviews  
9 and meta-analyses: the PRISMA statement., *PLoS Med.* 6 (2009) e1000097.  
10 doi:10.1371/journal.pmed.1000097.
- 11 [14] M.C. Brouwers, M.E. Kho, G.P. Browman, J.S. Burgers, F. Cluzeau, G. Feder, B. Fervers, I.D.  
12 Graham, J. Grimshaw, S.E. Hanna, P. Littlejohns, J. Makarski, L. Zitzelsberger, The Global Rating  
13 Scale complements the AGREE II in advancing the quality of practice guidelines., *J. Clin.*  
14 *Epidemiol.* 65 (2012) 526–534. doi:10.1016/j.jclinepi.2011.10.008.
- 15 [15] M.C. Brouwers, M.E. Kho, G.P. Browman, J.S. Burgers, F. Cluzeau, G. Feder, B. Fervers, I.D.  
16 Graham, S.E. Hanna, J. Makarski, Development of the AGREE II, part 1: performance, usefulness  
17 and areas for improvement., *CMAJ.* 182 (2010) 1045–1052. doi:10.1503/cmaj.091714.
- 18 [16] M.C. Brouwers, M.E. Kho, G.P. Browman, J.S. Burgers, F. Cluzeau, G. Feder, B. Fervers, I.D.  
19 Graham, S.E. Hanna, J. Makarski, Development of the AGREE II, part 2: assessment of validity of  
20 items and tools to support application., *CMAJ.* 182 (2010) E472-8. doi:10.1503/cmaj.091716.
- 21 [17] F. Cluzeau, Conflicting recommendations. Let's not forget AGREE., *BMJ.* 338 (2009) b407.  
22 doi:10.1136/bmj.b407.
- 23 [18] M.A. Lawani, B. Valera, E. Fortier-Brochu, F. Legare, P.-H. Carmichael, L. Cote, P. Voyer, E.  
24 Kroger, H. Witteman, C. Rodriguez, A.M.C. Giguere, Five shared decision-making tools in 5  
25 months: use of rapid reviews to develop decision boxes for seniors living with dementia and  
26 their caregivers., *Syst. Rev.* 6 (2017) 56. doi:10.1186/s13643-017-0446-2.
- 27 [19] M.K. Murphy, N.A. Black, D.L. Lamping, C.M. McKee, C.F. Sanderson, J. Askham, T. Marteau,  
28 Consensus development methods, and their use in clinical guideline development., *Health*  
29 *Technol. Assess.* 2 (1998) i–iv, 1-88.
- 30 [20] J. Jones, D. Hunter, Jones J, Hunter D, J. J, H. D, Consensus methods for medical and health  
31 services research, *BMJ.* 311 (1995) 376–380. isi:A1995RN46900025.
- 32 [21] L.J.M. Oostendorp, M.-A. Durand, A. Lloyd, G. Elwyn, Measuring organisational readiness for  
33 patient engagement (MORE): an international online Delphi consensus study, *BMC Health Serv.*  
34 *Res.* 15 (2015) 61. doi:10.1186/s12913-015-0717-3.
- 35  
36  
37  
38  
39  
40  
41  
42  
43  
44  
45  
46  
47  
48  
49  
50  
51  
52  
53  
54  
55  
56  
57  
58  
59  
60



1  
2 **Supplementary File 1: Survey Invitation**

3  
4 SUBJ: Help us make more trustworthy patient materials: provide your feedback through a survey

5  
6 To the members of [group name/list-serv name] –

7  
8  
9 We are an international workgroup, led by Marie-Anne Durand and Glyn Elwyn at The Dartmouth Institute for Health Policy and  
10 Clinical Practice in Lebanon, N.H. We noticed a need for more clarity about how to select and summarize the evidence included  
11 in patient decision aids. Patient decision aids influence the decisions that patients make - so the need for trustworthy tools is  
12 important.  
13

14  
15 We wish to have your perspective, as an expert, patient, or other stakeholder.  
16

17  
18 **Please could you provide feedback via 2-3 surveys over the next few weeks?** Each survey should take less than 25  
19 minutes.  
20

21  
22 Please click the link below for more information and the first survey.  
23

24  
25 Many thanks,  
26

27  
28 The Evidence Summarization workgroup  
29  
30  
31  
32  
33  
34  
35  
36  
37  
38  
39  
40  
41  
42  
43  
44  
45  
46  
47

1  
2  
3  
4  
5  
6  
7  
8  
9  
10  
11  
12  
13  
14  
15  
16  
17  
18  
19  
20  
21  
22  
23  
24  
25  
26  
27  
28  
29  
30  
31  
32  
33  
34  
35  
36  
37  
38  
39  
40  
41  
42  
43  
44  
45  
46  
47

For peer review only

# Evidence Summarization Survey

## Information Sheet

### SURVEY INFORMATION

#### What is the study about?

We want to generate consensus on an approach for selecting and summarizing the evidence included in patient decision aids. Our workgroup developed a proposed set of Phases, Steps and Criteria, based on the methods used to develop trustworthy clinical practice guidelines. The purpose of this survey is to gain your perspective, as an expert, patient or other stakeholder.

#### What is involved?

If you participate, we'll ask you to complete two or three surveys. In the first survey, we'll ask for your perspective on the proposed Phases, Steps and Criteria. This will include rating importance, suggesting wording changes and suggesting additional items. In the second and third surveys, we'll ask similar questions except we'll also share some results from the first survey.

#### How long will it take?

Completing this survey should take less than 25 minutes.

#### Do I have to take part?

No. Taking part is voluntary.

#### Will I be compensated?

You won't be compensated. However, we hope you'll take part. Your contributions

1 will improve the process of developing reliable, high-quality decision aids for  
2 patients.

3  
4  
5 **Are there any risks?**

6 We don't anticipate any risks from participating in the study.  
7  
8  
9

10 **How will my privacy be protected?**

11 We won't name any individuals in any publications or presentations.  
12  
13  
14

15 **How can I contact you?**

16 If you have questions, please feel free to contact Michelle Dannenberg  
17 (Michelle.D.Dannenberg@dartmouth.edu), Research Coordinator, The Dartmouth  
18 Institute for Health Policy and Clinical Practice, Dartmouth College.  
19  
20  
21  
22  
23

24 If you would like to speak to the researchers leading this study, please contact Prof.  
25 Marie-Anne Durand (Marie-Anne.Durand@dartmouth.edu) or Prof. Glyn Elwyn  
26 (glynelwyn@gmail.com), The Dartmouth Institute for Health Policy and Clinical  
27 Practice, Dartmouth College.  
28  
29  
30  
31  
32

33 **What happens if I do not respond?**

34 You'll receive two automated email reminders to complete the survey.  
35  
36  
37  
38  
39  
40

41 Do you want to participate?

42  
43  Yes

44  No  
45  
46  
47  
48  
49

50  
51 **Background Questions**

52  
53  
54  
55 **BACKGROUND QUESTIONS**  
56  
57  
58  
59  
60

1 Which of the following best describes you? Please select all that apply.  
2

- 3  Patient Decision Aid (PDA) developer
- 4  Researcher
- 5
- 6  International Patient Decision Aids Standards (IPDAS) collaboration member
- 7
- 8  Policy maker
- 9
- 10  Patient
- 11
- 12  Clinician, please specify specialty:
- 13
- 14  Other, please specify:
- 15
- 16
- 17
- 18
- 19
- 20
- 21
- 22

23 Which country do you live in?  
24

25   
26

27

28

29

30 What is your gender?  
31

- 32  Male
- 33
- 34  Female
- 35
- 36  Other
- 37
- 38
- 39
- 40
- 41

42 What is your race/ethnicity? Please select all that apply.  
43

- 44  American Indian or Alaska Native
- 45
- 46  Asian
- 47
- 48  Black or African American
- 49
- 50  Native Hawaiian or Other Pacific Islander
- 51
- 52  Hispanic, Latino/a or Spanish Origin
- 53
- 54  White
- 55
- 56
- 57
- 58
- 59

1  Other, please specify:

2  
3  
4 **BACKGROUND QUESTIONS**

5  
6  
7  
8  
9 We're requesting your email address so we can contact you for the next phase of  
10 this project. We will not share your email with anyone outside the study team, and  
11 we will not contact you about anything other than the study.  
12  
13  
14

15  
16 Please provide your email:

17  
18  
19

20  
21  
22  
23 **Overall Proposed Phases, Steps and Criteria**

24  
25  
26  
27 **INFORMATION ON PROPOSED PROCESS**

28  
29  
30  
31  
32 **Decision aids are tools that help patients make choices.** They provide  
33 information about the risks and benefits of health treatments and tests.

34  
35  
36  
37 **Accurate and clear information is critical.** It's important for decision aids to have  
38 accurate and trustworthy information from research evidence about the risks and  
39 benefits of health treatments and tests.  
40  
41  
42

43  
44  
45 **We're trying to make evidence summarization easier.** We're doing this by  
46 developing a process to guide decision aid developers in evidence summarization.  
47  
48

49  
50 **We're building on the good work that's already been done.** This process  
51 includes the existing work of the International Patient Decision Aid Standards  
52 (IPDAS) collaboration.  
53  
54

55  
56  
57 **We sketched out a proposed process,** see Figure below. We are interested in  
58 your feedback on ALL elements of this, including the Phases, Steps and Criteria, as  
59

60 For peer review only - <http://bmjopen.bmj.com/site/about/guidelines.xhtml>

well as the order and grouping.

1  
2  
3 **Here's how you can help.** In the questions that follow, we will ask for your  
4 perspective on **how important each criterion is to include in the proposed**  
5 **process.** We will also ask for feedback on the wording of all parts. Nothing is final.  
6  
7 Everything is up for discussion, and we are looking forward to hearing from you.  
8  
9

10  
11  
12 **Below is a visual representation of the proposed process.** Review it carefully.  
13  
14 There are four proposed phases, each with one to five proposed steps. Each step  
15 has a number of proposed Criteria. In the visual representation below, we show the  
16 first Criteria for each step. The tabs represent additional Criteria.  
17  
18

19  
20  
21 Feel free to [click here](#) to view the representation of the proposed Phases, Steps  
22 and Criteria in a separate window. You can click on the image to zoom. You can  
23 refer back to this image as you answer questions about the proposed process. Don't  
24 worry, if you accidentally close the window, there are links to the figure on each page  
25 of the survey.  
26  
27  
28  
29  
30  
31  
32  
33  
34  
35  
36  
37  
38  
39  
40  
41  
42  
43  
44  
45  
46  
47  
48  
49  
50  
51  
52  
53  
54  
55  
56  
57  
58  
59  
60

# Proposed Phases, Steps and Criteria

## For the Evidence Summarization of Patient Decision Aids

| Phase                                             | Step                                             | Criteria                                                                                                                                                         |
|---------------------------------------------------|--------------------------------------------------|------------------------------------------------------------------------------------------------------------------------------------------------------------------|
| <b>Phase 1</b><br>Define Process and Scope        | Define the Question                              | 1/3 The question is defined according to which population is relevant for this PDA.                                                                              |
|                                                   | Document Process and Policies                    | 1/4 The evidence summarization process is documented.                                                                                                            |
|                                                   | Manage COI                                       | 1/4 The conflicts of interest of people who summarize evidence are collected.                                                                                    |
|                                                   | Assemble Team                                    | 1/4 A multidisciplinary team is assembled.                                                                                                                       |
|                                                   | Define the Scope of Patient Decision Aid Content | 1/6 The population for whom the PDA is designed for is appropriate.                                                                                              |
| <b>Phase 2</b><br>Finding and Appraising Evidence | Search for Evidence                              | 1/6 There is a systematic search for evidence that relates to the options included in the PDA.                                                                   |
|                                                   | Select Evidence                                  | 1/4 There is a systematic process for selecting evidence for outcomes or patient concerns to include in the PDA.                                                 |
|                                                   | Appraise Evidence                                | 1/5 Evidence selected for inclusion in the PDA is critically appraised with a defined protocol.                                                                  |
| <b>Phase 3</b><br>Presenting Evidence             | Articulate the Information                       | 1/5 The evidence (or evidentiary gaps) about potential benefits relevant to each option is summarized in balanced ways, not expected to bias the interpretation. |
|                                                   | Manage COI                                       | 1/3 The conflicts of interest of people who summarize evidence are collected again before publishing the PDA.                                                    |
|                                                   | Report                                           | 1/4 The methods used to translate evidence to risk communication formats are reported.                                                                           |
|                                                   | Review                                           | 1/1 The PDA is reviewed externally.                                                                                                                              |
| <b>Phase 4</b><br>Updating                        | Update                                           | 1/1 The PDA content is updated when new evidence becomes available.                                                                                              |

### Phase 1

## PROPOSED PHASE 1



# Proposed Phases, Steps and Criteria

## For the Evidence Summarization of Patient Decision Aids

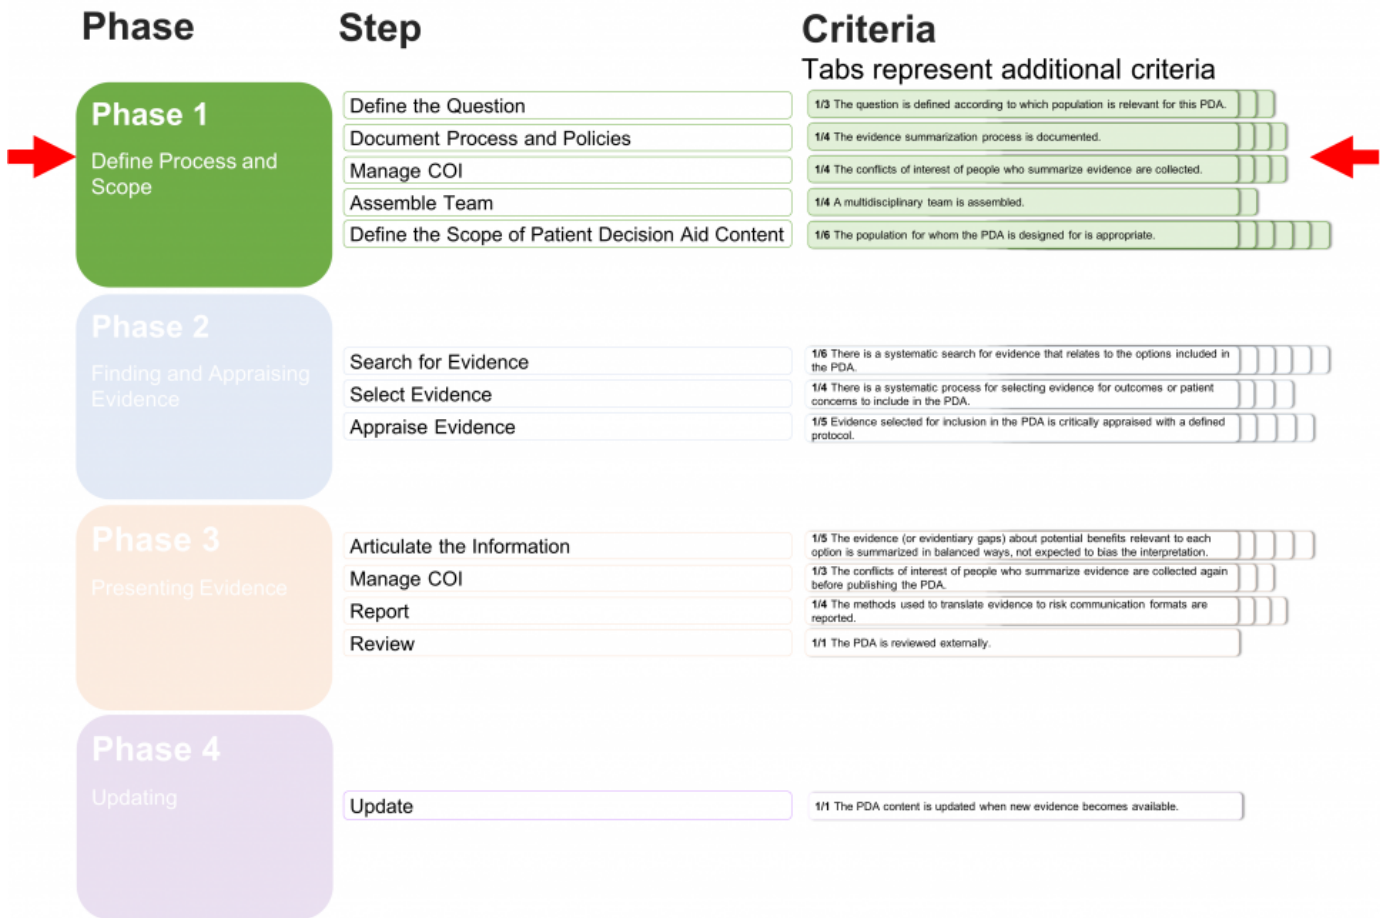

Feel free to [click here](#) to view a visualization of the proposed Phases, Steps and Criteria in a separate window while you complete the questions below.

Do you have any comments or suggestions on the Phase below? If so, please share them.

- Phase 1: Defining Process and Scope**

1  
2  
3  
4  
5  
6  
7  
8  
9  
10  
11  
12  
13  
14  
15  
16  
17  
18  
19  
20  
21  
22  
23  
24  
25  
26  
27  
28  
29  
30  
31  
32  
33  
34  
35  
36  
37  
38  
39  
40  
41  
42  
43  
44  
45  
46  
47  
48  
49  
50  
51  
52  
53  
54  
55  
56  
57  
58  
59  
60

Do you have any comments on the Steps below, including their wording or order? Or suggestions for additional steps? If so, please share them.

- **Step 1: Define the Question**
- **Step 2: Document Process and Policies**
- **Step 3: Manage COI**
- **Step 4: Assemble Team**
- **Step 5: Define the Scope of Patient Decision Aid Content**

## PROPOSED PHASE 1 STEP 1

# Proposed Phases, Steps and Criteria

## For the Evidence Summarization of Patient Decision Aids

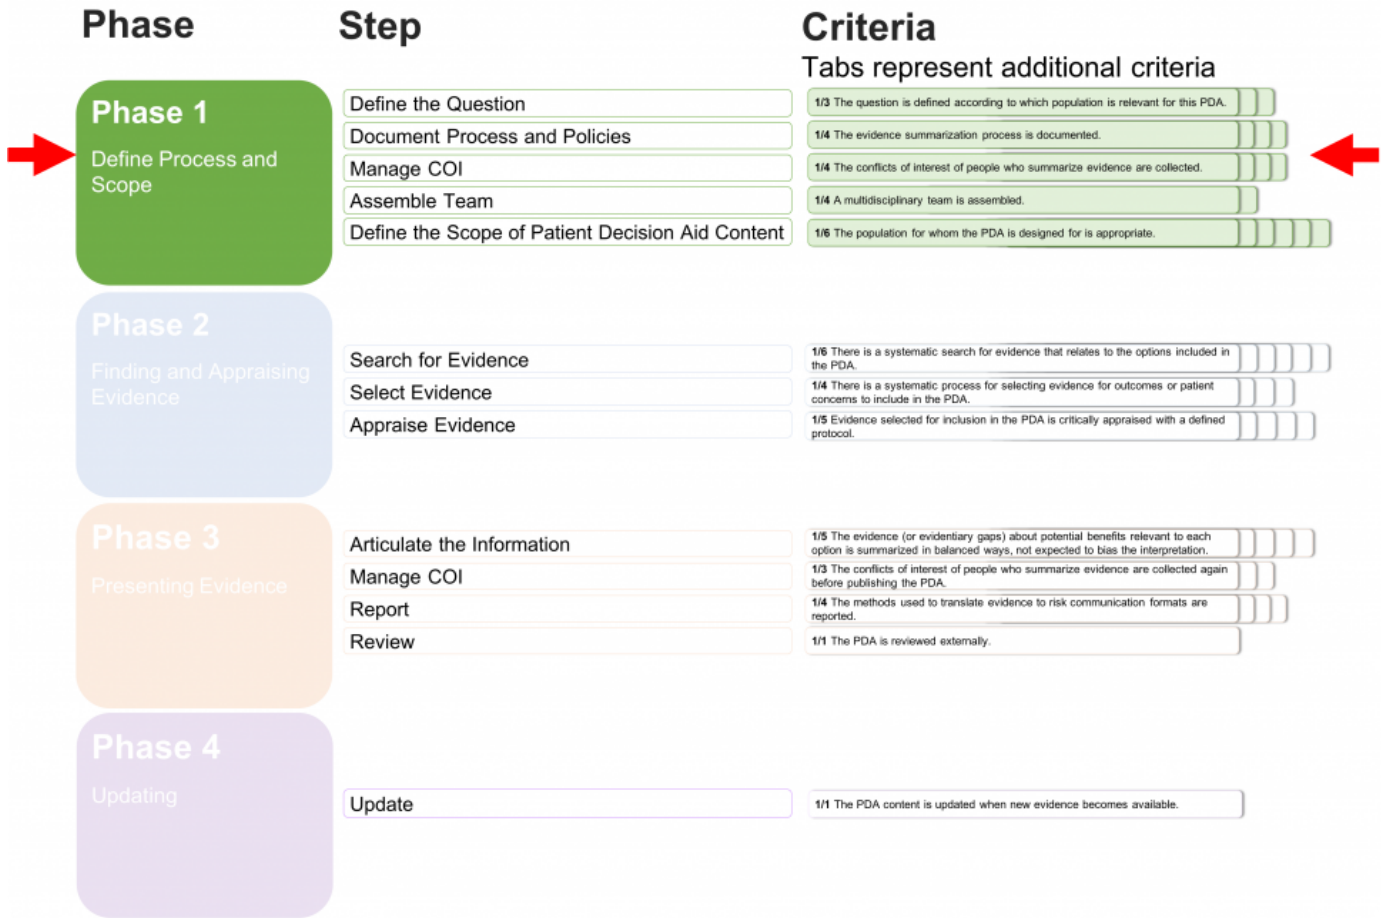

Feel free to [click here](#) to view a visualization of the proposed Phases, Steps and Criteria in a separate window while you complete the questions below.

Do you have any comments or suggestions on the Step below? If so, please share them.

- **Step 1: Define the Question**

The proposed Criteria for this step are below. Please indicate whether each Criterium should be omitted, or whether it is a possible candidate for inclusion, a desirable candidate for inclusion or is essential for inclusion.

Omit Possible Desira

The question is defined according to which population is relevant for this PDA.

The question is defined according to which options are relevant for this PDA.

The question is defined according to which outcomes or patient concerns are relevant for this PDA.

Do you have any comments or suggestions on the Criteria above? If so, please share them.

Do you have any suggestions for additional Criteria to include in this Step? If so, please share them.

## PROPOSED PHASE 1 STEP 2

# Proposed Phases, Steps and Criteria

## For the Evidence Summarization of Patient Decision Aids

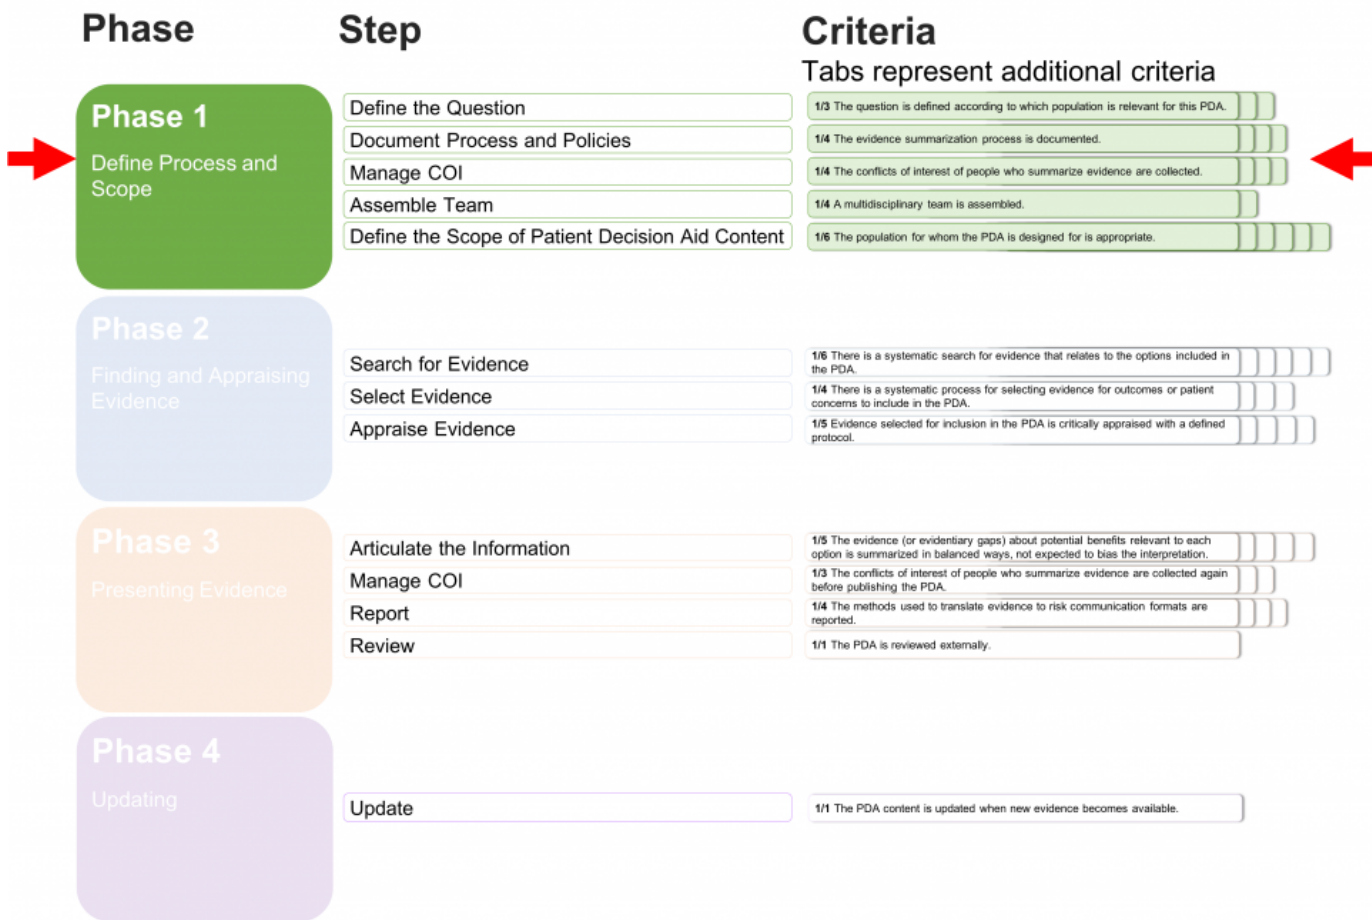

Feel free to [click here](#) to view a visualization of the proposed Phases, Steps and Criteria in a separate window while you complete the questions below.

Do you have any comments or suggestions on this Step? If so, please share them.

- Step 2: Document Process and Policies**

1  
2  
3  
4  
5  
6  
7  
8  
9  
10  
11  
12  
13  
14  
15  
16  
17  
18  
19  
20  
21  
22  
23  
24  
25  
26  
27  
28  
29  
30  
31  
32  
33  
34  
35  
36  
37  
38  
39  
40  
41  
42  
43  
44  
45  
46  
47  
48  
49  
50  
51  
52  
53  
54  
55  
56  
57  
58  
59  
60

The proposed Criteria for this step are below. Please indicate whether each Criterium should be omitted, or whether it is a possible candidate for inclusion, a desirable candidate for inclusion or is essential for inclusion.

Omit Possible C

- The evidence summarization process is documented.
- The evidence summarization process minimizes bias.
- The evidence summarization process minimizes conflicts of interest.
- The conflict of interest policy applying to people who summarize evidence is documented.

Do you have any comments or suggestions on the Criteria above? If so, please share them.

Do you have any suggestions for additional Criteria to include in this Step? If so, please share them.

### PROPOSED PHASE 1 STEP 3

# Proposed Phases, Steps and Criteria

## For the Evidence Summarization of Patient Decision Aids

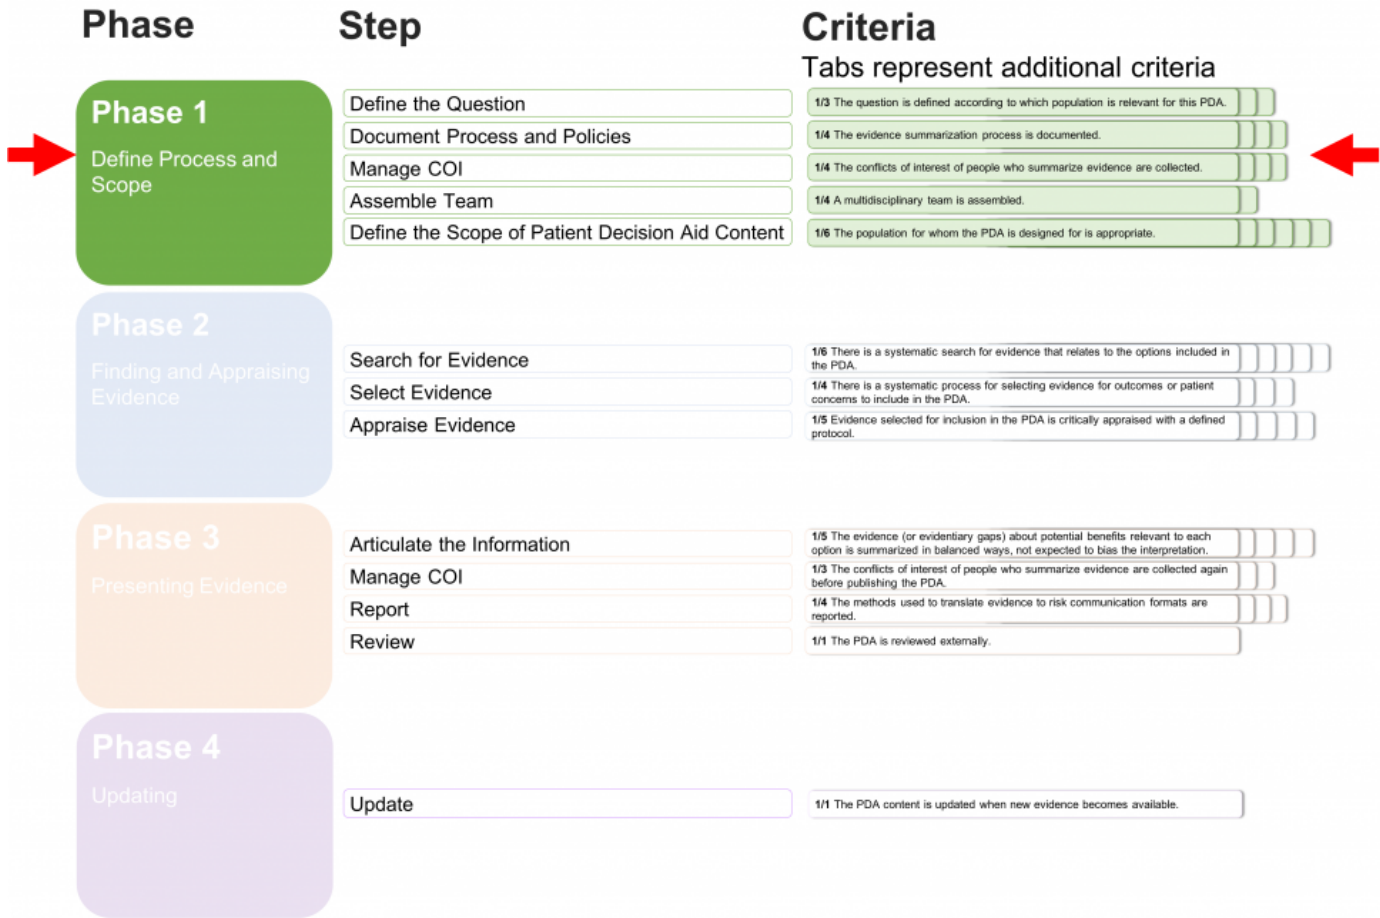

Feel free to [click here](#) to view a visualization of the proposed Phases, Steps and Criteria in a separate window while you complete the questions below.

Do you have any comments or suggestions on this Step? If so, please share them.

- **Step 3: Manage COI**

The proposed Criteria for this step are below. Please indicate whether each Criterium should be omitted, or whether it is a possible candidate for inclusion, a desirable candidate for inclusion or is essential for inclusion.

Omit Possible E

The conflicts of interest of people who summarize evidence are collected.

Actions are taken to manage relevant conflicts of interest.

The actions taken on relevant conflicts of interest are documented.

Conflicts of interest are monitored over the course of PDA development.

Do you have any comments or suggestions on the Criteria above? If so, please share them.

Do you have any suggestions for additional Criteria to include in this Step? If so, please share them.

## PROPOSED PHASE 1 STEP 4



# Proposed Phases, Steps and Criteria

## For the Evidence Summarization of Patient Decision Aids



Feel free to [click here](#) to view a visualization of the proposed Phases, Steps and Criteria in a separate window while you complete the questions below.

Do you have any comments or suggestions on the Step below? If so, please share them.

- Step 4: Assemble Team**

1  
2  
3  
4  
5  
6  
7  
8  
9  
10  
11  
12  
13  
14  
15  
16  
17  
18  
19  
20  
21  
22  
23  
24  
25  
26  
27  
28  
29  
30  
31  
32  
33  
34  
35  
36  
37  
38  
39  
40  
41  
42  
43  
44  
45  
46  
47  
48  
49  
50  
51  
52  
53  
54  
55  
56  
57  
58  
59  
60

The proposed Criteria for this step are below. Please indicate whether each Criterium should be omitted, or whether it is a possible candidate for inclusion, a desirable candidate for inclusion or is essential for inclusion.

Omit Possible [

- A multidisciplinary team is assembled.
- The team comprises clinicians.
- The team comprises methodological experts.
- The team comprises patient or consumer representatives.

Do you have any comments or suggestions on the Criteria above? If so, please share them.

Do you have any suggestions for additional Criteria to include in this Step? If so, please share them.

## PROPOSED PHASE 1 STEP 5

# Proposed Phases, Steps and Criteria

## For the Evidence Summarization of Patient Decision Aids



Feel free to [click here](#) to view a visualization of the proposed Phases, Steps and Criteria in a separate window while you complete the questions below.

Do you have any comments or suggestions on the Step below? If so, please share them.

- **Step 5: Define the Scope of Patient Decision Aid Content**

The proposed Criteria for this step are below. Please indicate whether each Criterium should be omitted, or whether it is a possible candidate for inclusion, a desirable candidate for inclusion or is essential for inclusion.

Omit Possible C

The population for whom the PDA is designed for is appropriate.

There is a systematic process to reduce bias in the definition of the population for the PDA.

The options for inclusion in the PDA are appropriate for the intended population.

There is a systematic process to reduce bias in the definition of the options for the PDA.

The outcomes or patient concerns for inclusion in the PDA are appropriate for the intended population and options.

There is a systematic process to reduce bias in the definition of the outcomes or patient concerns for the PDA.

Do you have any comments or suggestions on the Criteria above? If so, please share them.

Do you have any suggestions for additional Criteria to include in this Step? If so, please share them.

## Phase 2

## PROPOSED PHASE 2

# Proposed Phases, Steps and Criteria

For the Evidence Summarization of Patient Decision Aids

| Phase                                      | Step                                             | Criteria                                                                                                                                                         |
|--------------------------------------------|--------------------------------------------------|------------------------------------------------------------------------------------------------------------------------------------------------------------------|
| Phase 1<br>Define Process and Scope        | Define the Question                              | 1/3 The question is defined according to which population is relevant for this PDA.                                                                              |
|                                            | Document Process and Policies                    | 1/4 The evidence summarization process is documented.                                                                                                            |
|                                            | Manage COI                                       | 1/4 The conflicts of interest of people who summarize evidence are collected.                                                                                    |
|                                            | Assemble Team                                    | 1/4 A multidisciplinary team is assembled.                                                                                                                       |
|                                            | Define the Scope of Patient Decision Aid Content | 1/6 The population for whom the PDA is designed for is appropriate.                                                                                              |
| Phase 2<br>Finding and Appraising Evidence | Search for Evidence                              | 1/6 There is a systematic search for evidence that relates to the options included in the PDA.                                                                   |
|                                            | Select Evidence                                  | 1/4 There is a systematic process for selecting evidence for outcomes or patient concerns to include in the PDA.                                                 |
|                                            | Appraise Evidence                                | 1/5 Evidence selected for inclusion in the PDA is critically appraised with a defined protocol.                                                                  |
| Phase 3<br>Presenting Evidence             | Articulate the Information                       | 1/5 The evidence (or evidentiary gaps) about potential benefits relevant to each option is summarized in balanced ways, not expected to bias the interpretation. |
|                                            | Manage COI                                       | 1/3 The conflicts of interest of people who summarize evidence are collected again before publishing the PDA.                                                    |
|                                            | Report                                           | 1/4 The methods used to translate evidence to risk communication formats are reported.                                                                           |
|                                            | Review                                           | 1/1 The PDA is reviewed externally.                                                                                                                              |
| Phase 4<br>Updating                        | Update                                           | 1/1 The PDA content is updated when new evidence becomes available.                                                                                              |

Feel free to [click here](#) to view a visualization of the proposed Phases, Steps and Criteria in a separate window while you complete the questions below.

Do you have any comments or suggestions on the Phase below? If so, please share them.

- Phase 2: Finding & Appraising Evidence

Do you have any comments on the Steps below, including their wording or order? Or suggestions for additional steps? If so, please share them.

- Step 1: Search for Evidence
- Step 2: Select Evidence
- Step 3: Appraise Evidence

## PROPOSED PHASE 2 STEP 1

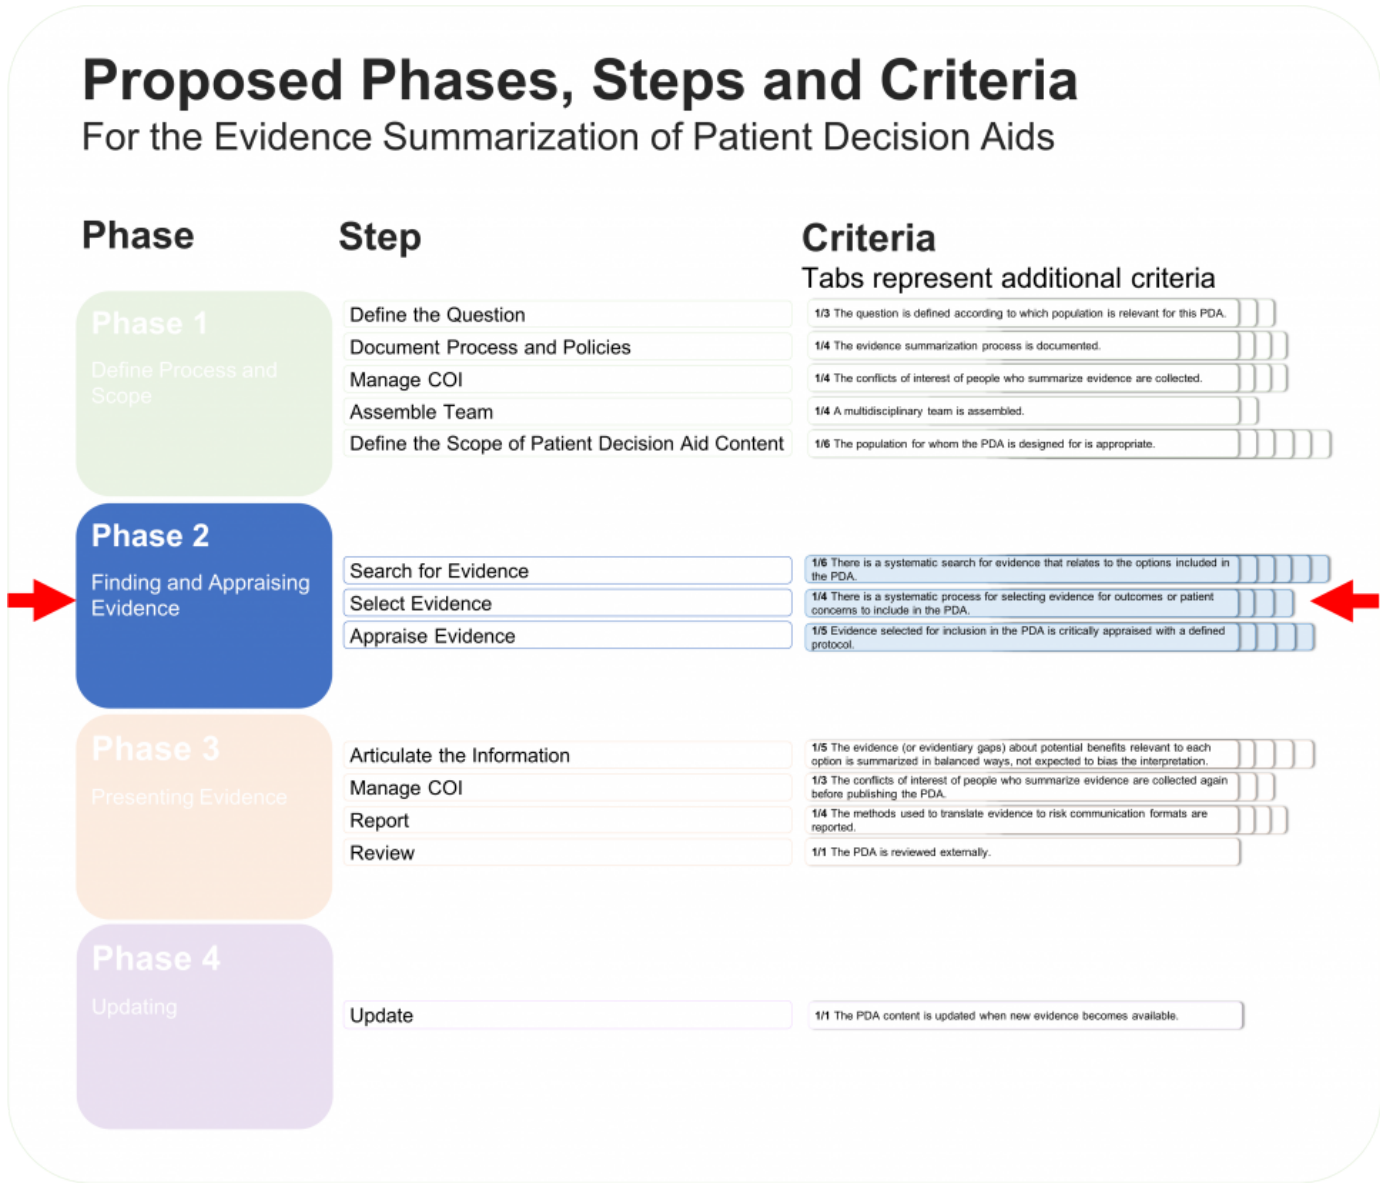

1 Feel free to [click here](#) to view a visualization of the proposed Phases, Steps and  
2 Criteria in a separate window while you complete the questions below.  
3  
4  
5

6  
7 Do you have any comments or suggestions on this Step? If so, please share them.  
8  
9

10 • **Step 1: Search for Evidence**  
11  
12  
13  
14  
15

16   
17

18  
19  
20 The proposed Criteria for this step are below. Please indicate whether each  
21 Criterium should be omitted, or whether it is a possible candidate for inclusion,  
22 a desirable candidate for inclusion or is essential for inclusion.  
23  
24  
25

|    | Omit | Possible | Essential |
|----|------|----------|-----------|
| 26 |      |          |           |
| 27 |      |          |           |
| 28 |      |          |           |
| 29 |      |          |           |
| 30 |      |          |           |
| 31 |      |          |           |
| 32 |      |          |           |
| 33 |      |          |           |
| 34 |      |          |           |
| 35 |      |          |           |
| 36 |      |          |           |
| 37 |      |          |           |
| 38 |      |          |           |
| 39 |      |          |           |
| 40 |      |          |           |
| 41 |      |          |           |
| 42 |      |          |           |
| 43 |      |          |           |
| 44 |      |          |           |
| 45 |      |          |           |
| 46 |      |          |           |
| 47 |      |          |           |
| 48 |      |          |           |
| 49 |      |          |           |
| 50 |      |          |           |
| 51 |      |          |           |
| 52 |      |          |           |
| 53 |      |          |           |
| 54 |      |          |           |
| 55 |      |          |           |
| 56 |      |          |           |
| 57 |      |          |           |
| 58 |      |          |           |
| 59 |      |          |           |
| 60 |      |          |           |

Do you have any comments or suggestions on the Criteria above? If so, please share them.

Do you have any suggestions for additional Criteria to include in this Step? If so, please share them.

## PROPOSED PHASE 2 STEP 2

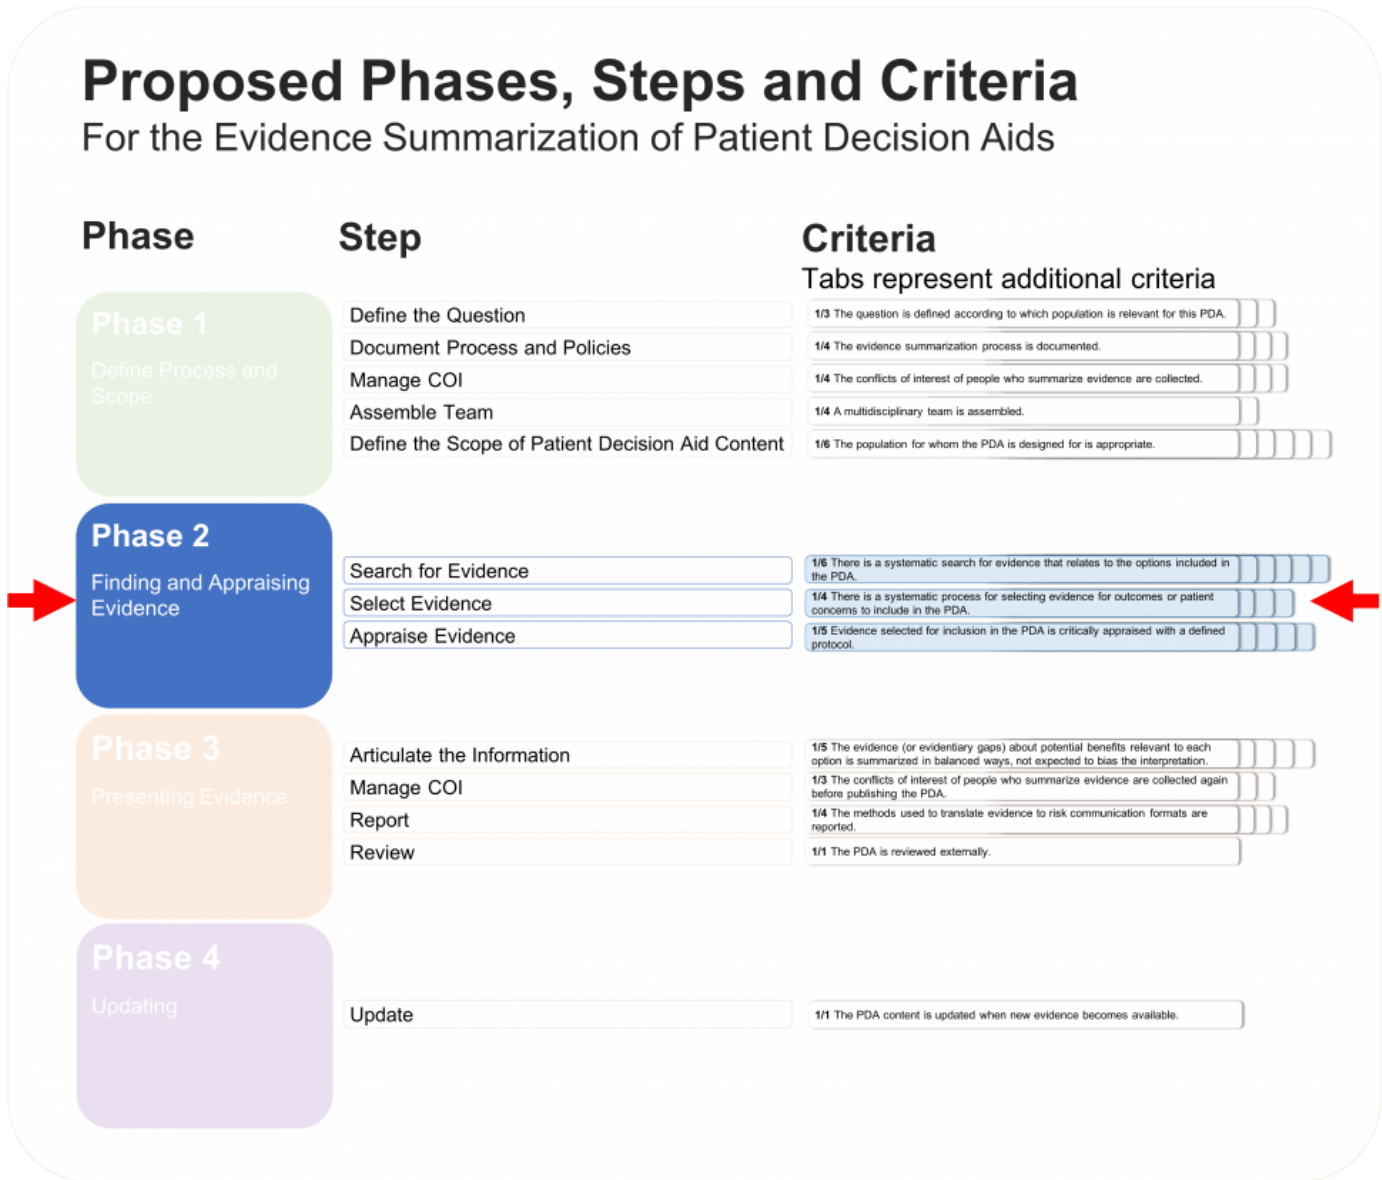

Feel free to [click here](#) to view a visualization of the proposed Phases, Steps and Criteria in a separate window while you complete the questions below.

Do you have any comments or suggestions on the Step below? If so, please share them.

- **Step 2: Select Evidence**



[Empty text box]

The proposed Criteria for this step are below. Please indicate whether each Criterium should be omitted, or whether it is a possible candidate for inclusion, a desirable candidate for inclusion or is essential for inclusion.

Omit Possible E

There is a systematic process for selecting evidence for outcomes or patient concerns to include in the PDA (where evidence is not available, can directly ask patients).

There is a systematic process for selecting evidence (or evidentiary gaps) about potential benefits relevant to each option.

There is a systematic process for selecting evidence (or evidentiary gaps) about potential harms relevant to each option.

If the PDA is customizable to individual patient factors, there is a systematic process for selecting relevant risk predictors to include in the PDA.

Do you have any comments or suggestions on the Criteria above? If so, please share them.

[Empty text box]

Do you have any suggestions for additional Criteria to include in this Step? If so, please share them.

[Empty text box]

### PROPOSED PHASE 2 STEP 3

# Proposed Phases, Steps and Criteria

For the Evidence Summarization of Patient Decision Aids

| Phase                                             | Step                                             | Criteria                                                                                                                                                         |
|---------------------------------------------------|--------------------------------------------------|------------------------------------------------------------------------------------------------------------------------------------------------------------------|
| <b>Phase 1</b><br>Define Process and Scope        | Define the Question                              | 1/3 The question is defined according to which population is relevant for this PDA.                                                                              |
|                                                   | Document Process and Policies                    | 1/4 The evidence summarization process is documented.                                                                                                            |
|                                                   | Manage COI                                       | 1/4 The conflicts of interest of people who summarize evidence are collected.                                                                                    |
|                                                   | Assemble Team                                    | 1/4 A multidisciplinary team is assembled.                                                                                                                       |
|                                                   | Define the Scope of Patient Decision Aid Content | 1/6 The population for whom the PDA is designed for is appropriate.                                                                                              |
| <b>Phase 2</b><br>Finding and Appraising Evidence | Search for Evidence                              | 1/6 There is a systematic search for evidence that relates to the options included in the PDA.                                                                   |
|                                                   | Select Evidence                                  | 1/4 There is a systematic process for selecting evidence for outcomes or patient concerns to include in the PDA.                                                 |
|                                                   | Appraise Evidence                                | 1/5 Evidence selected for inclusion in the PDA is critically appraised with a defined protocol.                                                                  |
| <b>Phase 3</b><br>Presenting Evidence             | Articulate the Information                       | 1/5 The evidence (or evidentiary gaps) about potential benefits relevant to each option is summarized in balanced ways, not expected to bias the interpretation. |
|                                                   | Manage COI                                       | 1/3 The conflicts of interest of people who summarize evidence are collected again before publishing the PDA.                                                    |
|                                                   | Report                                           | 1/4 The methods used to translate evidence to risk communication formats are reported.                                                                           |
|                                                   | Review                                           | 1/1 The PDA is reviewed externally.                                                                                                                              |
| <b>Phase 4</b><br>Updating                        | Update                                           | 1/1 The PDA content is updated when new evidence becomes available.                                                                                              |

Feel free to [click here](#) to view a visualization of the proposed Phases, Steps and Criteria in a separate window while you complete the questions below.

Do you have any comments or suggestions on the Step below? If so, please share them.

- Step 3: Appraise Evidence**

The proposed Criteria for this step are below. Please indicate whether each Criterium should be omitted, or whether it is a possible candidate for inclusion, a desirable candidate for inclusion or is essential for inclusion.

Omit Possible E

Evidence selected for inclusion in the PDA is critically appraised with a defined protocol (such as GRADE).

The protocol for critical appraisal of evidence accounts for risks of bias in study design.

The protocol for critical appraisal of evidence accounts for risks of bias in study analysis and reporting.

The protocol for critical appraisal of evidence accounts for assessment of certainty of evidence with attention to risk of bias, precision, directness, consistency, and publication bias.

The conflicts of interest of study authors related to selected evidence is appraised.

Do you have any comments or suggestions on the Criteria above? If so, please share them.

Do you have any suggestions for additional Criteria to include in this Step? If so, please share them.

### Phase 3

## PROPOSED PHASE 3

# Proposed Phases, Steps and Criteria

For the Evidence Summarization of Patient Decision Aids

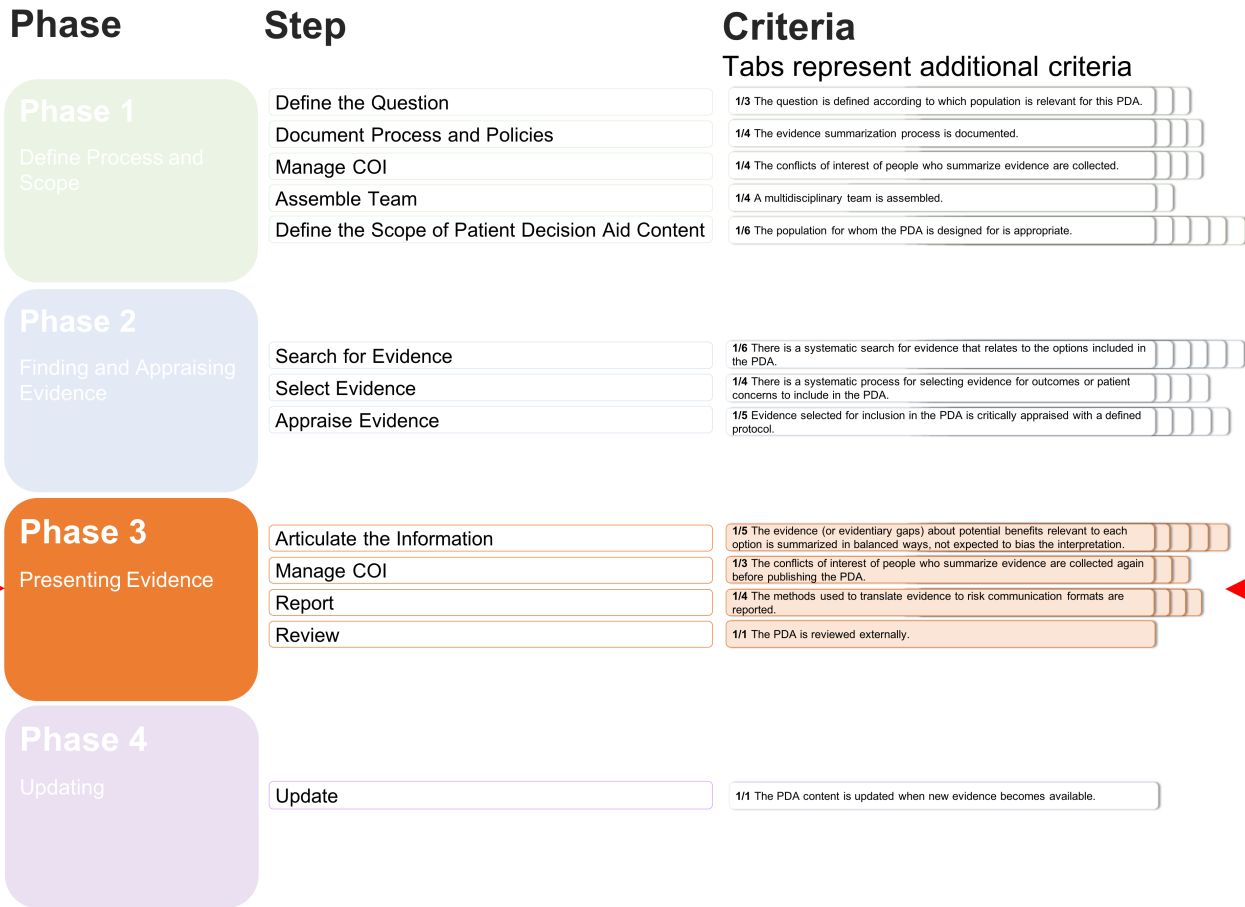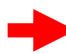

Feel free to [click here](#) to view a visualization of the proposed Phases, Steps and Criteria in a separate window while you complete the questions below.

Do you have any comments or suggestions on the Phase below? If so, please share them.

- Phase 3: Presenting Evidence

Do you have any comments on the Steps below, including their wording or order? Or do you have suggestions for additional steps? If so, please share them.

- Step 1: Articulate the Information
- Step 2: Manage COI
- Step 3: Report
- Step 4: Review

[Empty text input box]

### PROPOSED PHASE 3 STEP 1

## Proposed Phases, Steps and Criteria

For the Evidence Summarization of Patient Decision Aids

| Phase                                      | Step                                             | Criteria                                                                                                                                                         |
|--------------------------------------------|--------------------------------------------------|------------------------------------------------------------------------------------------------------------------------------------------------------------------|
| Phase 1<br>Define Process and Scope        | Define the Question                              | 1/3 The question is defined according to which population is relevant for this PDA.                                                                              |
|                                            | Document Process and Policies                    | 1/4 The evidence summarization process is documented.                                                                                                            |
|                                            | Manage COI                                       | 1/4 The conflicts of interest of people who summarize evidence are collected.                                                                                    |
|                                            | Assemble Team                                    | 1/4 A multidisciplinary team is assembled.                                                                                                                       |
|                                            | Define the Scope of Patient Decision Aid Content | 1/6 The population for whom the PDA is designed for is appropriate.                                                                                              |
| Phase 2<br>Finding and Appraising Evidence | Search for Evidence                              | 1/6 There is a systematic search for evidence that relates to the options included in the PDA.                                                                   |
|                                            | Select Evidence                                  | 1/4 There is a systematic process for selecting evidence for outcomes or patient concerns to include in the PDA.                                                 |
|                                            | Appraise Evidence                                | 1/5 Evidence selected for inclusion in the PDA is critically appraised with a defined protocol.                                                                  |
| Phase 3<br>Presenting Evidence             | Articulate the Information                       | 1/5 The evidence (or evidentiary gaps) about potential benefits relevant to each option is summarized in balanced ways, not expected to bias the interpretation. |
|                                            | Manage COI                                       | 1/3 The conflicts of interest of people who summarize evidence are collected again before publishing the PDA.                                                    |
|                                            | Report                                           | 1/4 The methods used to translate evidence to risk communication formats are reported.                                                                           |
|                                            | Review                                           | 1/1 The PDA is reviewed externally.                                                                                                                              |
| Phase 4<br>Updating                        | Update                                           | 1/1 The PDA content is updated when new evidence becomes available.                                                                                              |

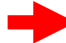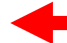

1  
2  
3  
4  
5  
6  
7  
8  
9  
10  
11  
12  
13  
14  
15  
16  
17  
18  
19  
20  
21  
22  
23  
24  
25  
26  
27  
28  
29  
30  
31  
32  
33  
34  
35  
36  
37  
38  
39  
40  
41  
42  
43  
44  
45  
46  
47  
48  
49  
50  
51  
52  
53  
54  
55  
56  
57  
58  
59  
60

Feel free to [click here](#) to view a visualization of the proposed Phases, Steps and Criteria in a separate window while you complete the questions below.

Do you have any comments or suggestions on the Step below? If so, please share them.

• **Step 1: Articulate the Information**

The proposed Criteria for this step are below. Please indicate whether each Criterium should be omitted, or whether it is a possible candidate for inclusion, a desirable candidate for inclusion or is essential for inclusion.

|                                                                                                                                                              | Omit                  | Possible              | I |
|--------------------------------------------------------------------------------------------------------------------------------------------------------------|-----------------------|-----------------------|---|
| The evidence (or evidentiary gaps) about potential benefits relevant to each option is summarized in balanced ways, not expected to bias the interpretation. | <input type="radio"/> | <input type="radio"/> |   |
| The evidence (or evidentiary gaps) about potential harms relevant to each option is summarized in balanced ways, not expected to bias the interpretation.    | <input type="radio"/> | <input type="radio"/> |   |
| The evidence (or evidentiary gaps) is summarized in ways that are easy to understand.                                                                        | <input type="radio"/> | <input type="radio"/> |   |
| The certainty of the evidence is described in ways that are easy to understand.                                                                              | <input type="radio"/> | <input type="radio"/> |   |
| The evidence summarization process is described in ways that are easy to understand.                                                                         | <input type="radio"/> | <input type="radio"/> |   |
| The funding used to summarize the evidence (and develop the PDA) is reported.                                                                                | <input type="radio"/> | <input type="radio"/> |   |

Do you have any comments or suggestions on the wording or order of any of the Criteria above? If so, please share them.

Do you have any suggestions for additional Criteria to include in this Step? If so, please share them.

## PROPOSED PHASE 3 STEP 2

# Proposed Phases, Steps and Criteria

For the Evidence Summarization of Patient Decision Aids

### Phase

### Step

### Criteria

Tabs represent additional criteria

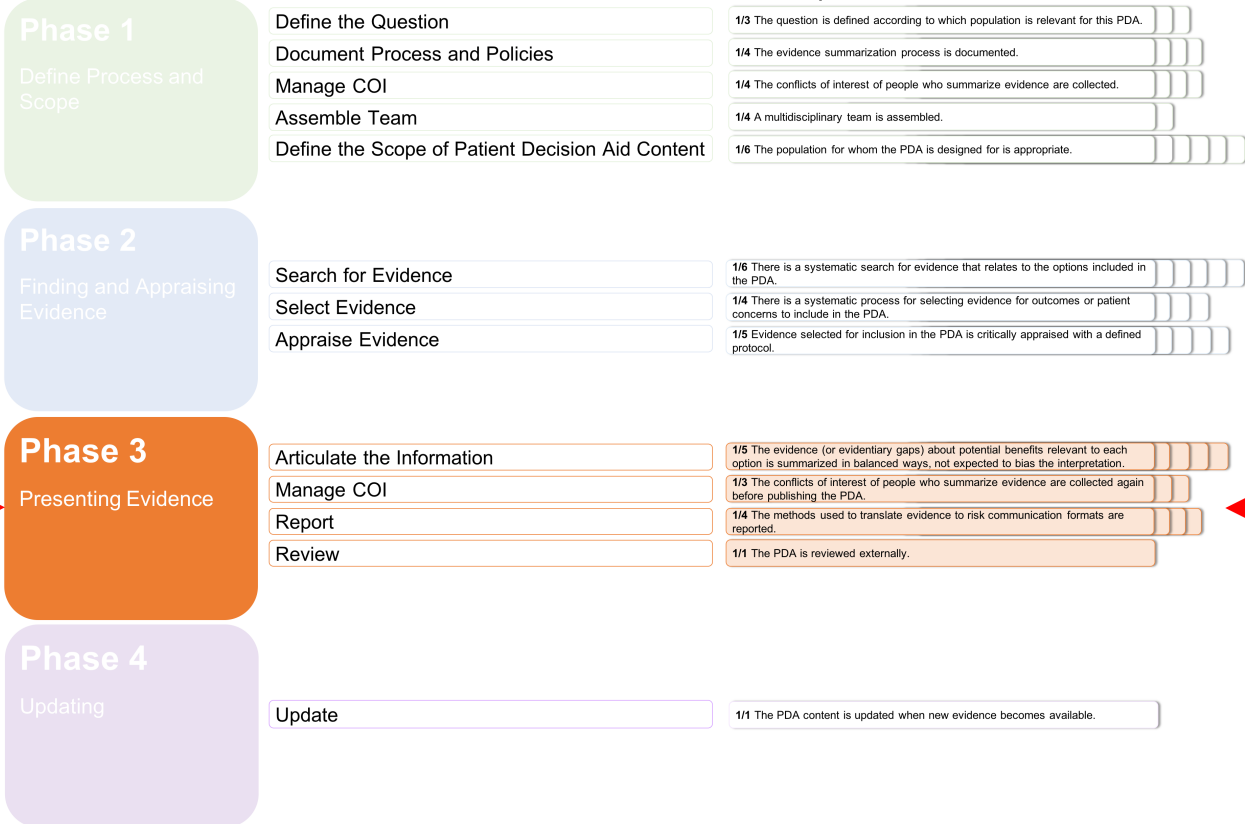

Feel free to [click here](#) to view a visualization of the proposed Phases, Steps and Criteria in a separate window while you complete the questions below.

1  
2  
3  
4  
5  
6  
7  
8  
9  
10  
11  
12  
13  
14  
15  
16  
17  
18  
19  
20  
21  
22  
23  
24  
25  
26  
27  
28  
29  
30  
31  
32  
33  
34  
35  
36  
37  
38  
39  
40  
41  
42  
43  
44  
45  
46  
47  
48  
49  
50  
51  
52  
53  
54  
55  
56  
57  
58  
59  
60

Do you have any comments or suggestions on the Step below? If so, please share them.

- **Step 2: Manage COI**

The proposed Criteria for this step are below. Please indicate whether each Criterium should be omitted, or whether it is a possible candidate for inclusion, a desirable candidate for inclusion or is essential for inclusion.

Omit Possible E

The conflicts of interest of people who summarize evidence are collected again before publishing the PDA.

 

Any change to the conflicts of interest of people who summarize evidence are reported.

 

Actions are taken to manage relevant conflicts of interest.

 

Do you have any comments or suggestions on the wording or order of any of the Criteria above? If so, please share them.

Do you have any suggestions for additional Criteria to include in this Step? If so, please share them.

## PROPOSED PHASE 3 STEP 3



# Proposed Phases, Steps and Criteria

## For the Evidence Summarization of Patient Decision Aids



Feel free to [click here](#) to view a visualization of the proposed Phases, Steps and Criteria in a separate window while you complete the questions below.

Do you have any comments or suggestions on the Step below? If so, please share them.

- **Step 3: Report**

1 The proposed Criteria for this step are below. Please indicate whether each  
2 Criterium should be omitted, or whether it is a possible candidate for inclusion,  
3 a desirable candidate for inclusion or is essential for inclusion.  
4  
5

6  
7 Omit Possible E

8  
9 The methods used to translate evidence to risk communication  
10 formats are reported.

11  
12 The approach to readability of summarized evidence is reported.

13  
14 The summarization process is reported publicly.

15  
16 The conflict of interest of people who summarize evidence are  
17 reported publicly.

18  
19  
20  
21  
22 Do you have any comments or suggestions on the wording or order of any of the  
23 Criteria above? If so, please share them.  
24

25  
26

27  
28  
29  
30  
31 Do you have any suggestions for additional Criteria to include in this Step? If so,  
32 please share them.  
33

34  
35

## 36 37 38 39 40 **PROPOSED PHASE 3 STEP 4**

# Proposed Phases, Steps and Criteria

## For the Evidence Summarization of Patient Decision Aids

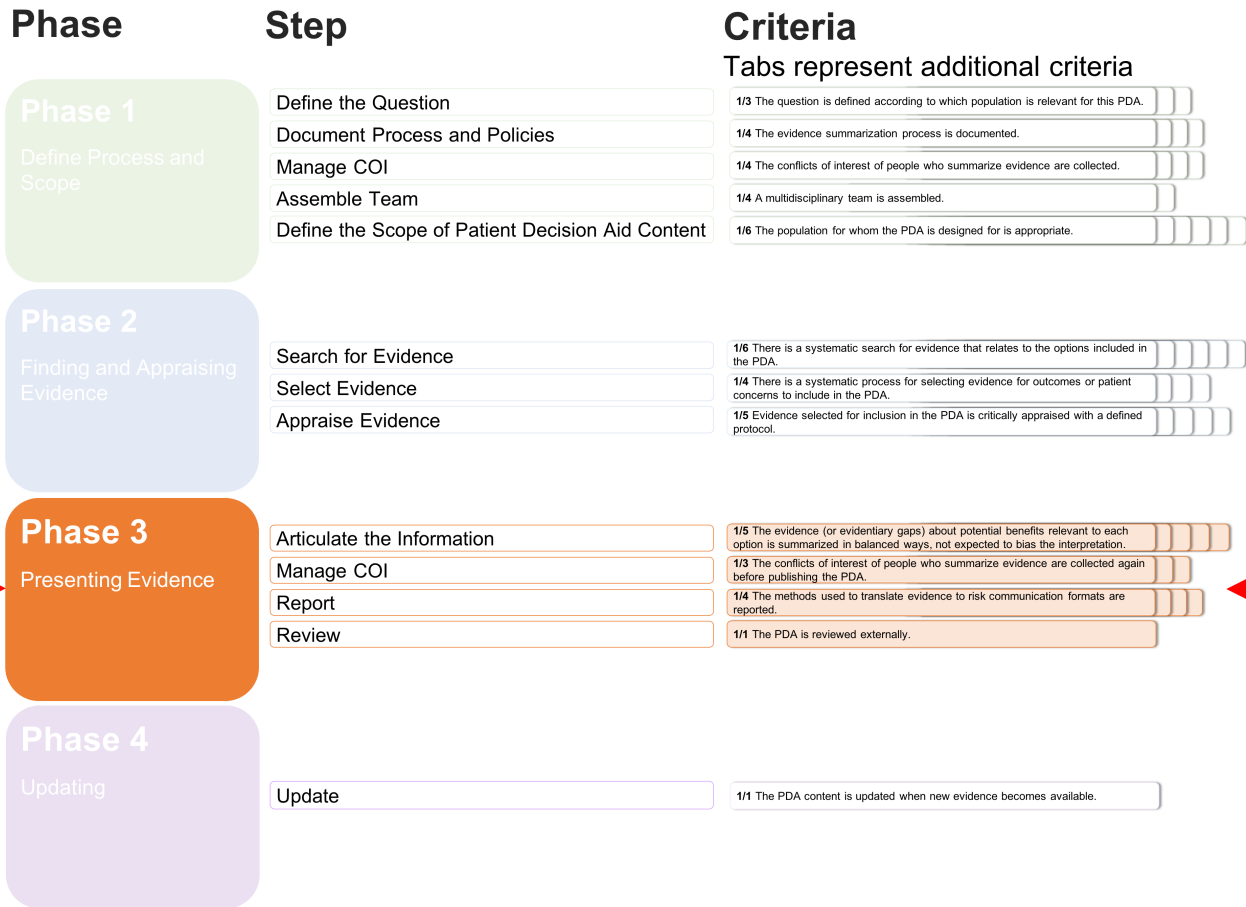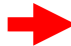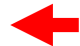

Feel free to [click here](#) to view a visualization of the proposed Phases, Steps and Criteria in a separate window while you complete the questions below.

Do you have any comments or suggestions on the Step below? If so, please share them.

- **Step 4: Review**

1 The proposed Criteria for this step are below. Please indicate whether each criterium  
2 should be omitted, or whether it is a possible candidate for inclusion,  
3 a desirable candidate for inclusion or is essential for inclusion.  
4  
5  
6

Omit F

7  
8  
9 The PDA is reviewed externally.

10  
11  
12  
13 Do you have any comments or suggestions on the wording or order of any of the  
14 Criteria above? If so, please share them.  
15

16  
17  
18

19  
20  
21  
22 Do you have any suggestions for additional Criteria to include in this Step? If so,  
23 please share them.  
24

25  
26  
27

28  
29  
30  
31 **Phase 4**

32  
33  
34  
35 **PROPOSED PHASE 4**

# Proposed Phases, Steps and Criteria

For the Evidence Summarization of Patient Decision Aids

| Phase                                             | Step                                             | Criteria                                                                                                                                                         |
|---------------------------------------------------|--------------------------------------------------|------------------------------------------------------------------------------------------------------------------------------------------------------------------|
| <b>Phase 1</b><br>Define Process and Scope        | Define the Question                              | 1/3 The question is defined according to which population is relevant for this PDA.                                                                              |
|                                                   | Document Process and Policies                    | 1/4 The evidence summarization process is documented.                                                                                                            |
|                                                   | Manage COI                                       | 1/4 The conflicts of interest of people who summarize evidence are collected.                                                                                    |
|                                                   | Assemble Team                                    | 1/4 A multidisciplinary team is assembled.                                                                                                                       |
|                                                   | Define the Scope of Patient Decision Aid Content | 1/6 The population for whom the PDA is designed for is appropriate.                                                                                              |
| <b>Phase 2</b><br>Finding and Appraising Evidence | Search for Evidence                              | 1/6 There is a systematic search for evidence that relates to the options included in the PDA.                                                                   |
|                                                   | Select Evidence                                  | 1/4 There is a systematic process for selecting evidence for outcomes or patient concerns to include in the PDA.                                                 |
|                                                   | Appraise Evidence                                | 1/5 Evidence selected for inclusion in the PDA is critically appraised with a defined protocol.                                                                  |
| <b>Phase 3</b><br>Presenting Evidence             | Articulate the Information                       | 1/5 The evidence (or evidentiary gaps) about potential benefits relevant to each option is summarized in balanced ways, not expected to bias the interpretation. |
|                                                   | Manage COI                                       | 1/3 The conflicts of interest of people who summarize evidence are collected again before publishing the PDA.                                                    |
|                                                   | Report                                           | 1/4 The methods used to translate evidence to risk communication formats are reported.                                                                           |
|                                                   | Review                                           | 1/1 The PDA is reviewed externally.                                                                                                                              |
| <b>Phase 4</b><br>Updating                        | Update                                           | 1/1 The PDA content is updated when new evidence becomes available.                                                                                              |

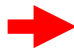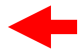

Feel free to [click here](#) to view a visualization of the proposed Phases, Steps and Criteria in a separate window while you complete the questions below.

Do you have any comments or suggestions on the Phase below? If so, please share them.

- Phase 4: Updating**

Do you have any comments or suggestions on the Step below. If so, please share them.

• Step 1: Update

## PROPOSED PHASE 4 STEP 1

# Proposed Phases, Steps and Criteria

For the Evidence Summarization of Patient Decision Aids

| Phase                                      | Step                                             | Criteria                                                                                                                                                         |
|--------------------------------------------|--------------------------------------------------|------------------------------------------------------------------------------------------------------------------------------------------------------------------|
| Phase 1<br>Define Process and Scope        | Define the Question                              | 1/3 The question is defined according to which population is relevant for this PDA.                                                                              |
|                                            | Document Process and Policies                    | 1/4 The evidence summarization process is documented.                                                                                                            |
|                                            | Manage COI                                       | 1/4 The conflicts of interest of people who summarize evidence are collected.                                                                                    |
|                                            | Assemble Team                                    | 1/4 A multidisciplinary team is assembled.                                                                                                                       |
|                                            | Define the Scope of Patient Decision Aid Content | 1/6 The population for whom the PDA is designed for is appropriate.                                                                                              |
| Phase 2<br>Finding and Appraising Evidence | Search for Evidence                              | 1/6 There is a systematic search for evidence that relates to the options included in the PDA.                                                                   |
|                                            | Select Evidence                                  | 1/4 There is a systematic process for selecting evidence for outcomes or patient concerns to include in the PDA.                                                 |
|                                            | Appraise Evidence                                | 1/5 Evidence selected for inclusion in the PDA is critically appraised with a defined protocol.                                                                  |
| Phase 3<br>Presenting Evidence             | Articulate the Information                       | 1/5 The evidence (or evidentiary gaps) about potential benefits relevant to each option is summarized in balanced ways, not expected to bias the interpretation. |
|                                            | Manage COI                                       | 1/3 The conflicts of interest of people who summarize evidence are collected again before publishing the PDA.                                                    |
|                                            | Report                                           | 1/4 The methods used to translate evidence to risk communication formats are reported.                                                                           |
|                                            | Review                                           | 1/1 The PDA is reviewed externally.                                                                                                                              |
| Phase 4<br>Updating                        | Update                                           | 1/1 The PDA content is updated when new evidence becomes available.                                                                                              |



1  
2  
3  
4  
5  
6  
7  
8  
9  
10  
11  
12  
13  
14  
15  
16  
17  
18  
19  
20  
21  
22  
23  
24  
25  
26  
27  
28  
29  
30  
31  
32  
33  
34  
35  
36  
37  
38  
39  
40  
41  
42  
43  
44  
45  
46  
47  
48  
49  
50  
51  
52  
53  
54  
55  
56  
57  
58  
59  
60  
Feel free to [click here](#) to view a visualization of the proposed Phases, Steps and Criteria in a separate window while you complete the questions below.

Do you have any comments or suggestions on the Step below? If so, please share them.

- **Step 1: Update**

The proposed Criteria for this step are below. Please indicate whether each criterium should be omitted, or whether it is a possible candidate for inclusion, a desirable candidate for inclusion or is essential for inclusion.

Omit Possible E

The PDA content is updated when new evidence becomes available.

 

Do you have any comments or suggestions on the wording of the criterion above? If so, please share them.

Do you have any suggestions for additional criteria to include in this Step? If so, please share them.

Powered by Qualtrics

**Supplementary File 3: Proposed Phases, Steps, and Criteria**

| Existing standard<br>(from IOM & USPSTF) | Phase                                            | Step                                                                                                               | Criteria                                                                                           |
|------------------------------------------|--------------------------------------------------|--------------------------------------------------------------------------------------------------------------------|----------------------------------------------------------------------------------------------------|
| Establishing transparency                | Phase I: Define Process and Scope                | Define the question                                                                                                | The question is defined according to which population is relevant for this PDA.                    |
|                                          |                                                  |                                                                                                                    | The question is defined according to which options are relevant for this PDA.                      |
|                                          |                                                  |                                                                                                                    | The question is defined according to which outcomes or patient concerns are relevant for this PDA. |
|                                          |                                                  | Document process and policies                                                                                      | The evidence summarization process is documented.                                                  |
|                                          |                                                  |                                                                                                                    | The evidence summarization process minimizes bias.                                                 |
|                                          |                                                  |                                                                                                                    | The evidence summarization process minimizes conflicts of interest.                                |
|                                          |                                                  |                                                                                                                    | The conflict of interest policy applying to people who summarize evidence is documented.           |
| Management of conflict of interest       | Manage COI                                       | The conflicts of interest of people who summarize evidence are collected.                                          |                                                                                                    |
|                                          |                                                  | Actions are taken to manage relevant conflicts of interest.                                                        |                                                                                                    |
|                                          |                                                  | The actions taken on relevant conflicts of interest are documented.                                                |                                                                                                    |
|                                          |                                                  | Conflicts of interest are monitored over the course of PDA development.                                            |                                                                                                    |
| Guideline development group composition  | Assemble team                                    | A multidisciplinary team is assembled.                                                                             |                                                                                                    |
|                                          |                                                  | The team comprises clinicians.                                                                                     |                                                                                                    |
|                                          |                                                  | The team comprises methodological experts.                                                                         |                                                                                                    |
|                                          |                                                  | The team comprises patient or consumer representatives.                                                            |                                                                                                    |
|                                          | Define the scope of patient decision aid content | The population for whom the PDA is designed for is appropriate.                                                    |                                                                                                    |
|                                          |                                                  | There is a systematic process to reduce bias in the definition of the population for the PDA.                      |                                                                                                    |
|                                          |                                                  | The options for inclusion in the PDA are appropriate for the intended population.                                  |                                                                                                    |
|                                          |                                                  | There is a systematic process to reduce bias in the definition of the options for the PDA.                         |                                                                                                    |
|                                          |                                                  | The outcomes or patient concerns for inclusion in the PDA are appropriate for the intended population and options. |                                                                                                    |



|                                                                         |                                                  |                               |                                                                                                                                                                           |
|-------------------------------------------------------------------------|--------------------------------------------------|-------------------------------|---------------------------------------------------------------------------------------------------------------------------------------------------------------------------|
|                                                                         |                                                  |                               | There is a systematic process to reduce bias in the definition of the outcomes or patient concerns for the PDA.                                                           |
| Guideline and systematic review intersection                            | PHASE II:<br>Finding &<br>Appraising<br>Evidence | Search for<br>evidence        | There is a systematic search for evidence that relates to the options included in the PDA.                                                                                |
|                                                                         |                                                  |                               | There is a systematic search for evidence that relates to the outcomes or patient concerns included in the PDA.                                                           |
|                                                                         |                                                  |                               | If the PDA is customizable to individual patient factors, there is a systematic search for evidence of how individual patient factors influence the expected outcomes.    |
| Establishing evidence foundations and rating strength of recommendation |                                                  | Select<br>evidence            | There is a systematic process for selecting evidence for outcomes or patient concerns to include in the PDA (where evidence is not available, can directly ask patients). |
|                                                                         |                                                  |                               | There is a systematic process for selecting evidence (or evidentiary gaps) about potential benefits relevant to each option.                                              |
|                                                                         |                                                  |                               | There is a systematic process for selecting evidence (or evidentiary gaps) about potential harms relevant to each option.                                                 |
|                                                                         |                                                  |                               | If the PDA is customizable to individual patient factors, there is a systematic process for selecting relevant risk predictors to include in the PDA.                     |
|                                                                         |                                                  | Appraise<br>evidence          | Evidence selected for inclusion in the PDA is critically appraised with a defined protocol (such as GRADE).                                                               |
|                                                                         |                                                  |                               | The protocol for critical appraisal of evidence accounts for risks of bias in study design.                                                                               |
|                                                                         |                                                  |                               | The protocol for critical appraisal of evidence accounts for risks of bias in study analysis and reporting.                                                               |
| Articulation of information                                             | PHASE III:<br>Presenting<br>Evidence             | Articulate the<br>information | The evidence (or evidentiary gaps) about potential benefits relevant to each option is summarized in balanced ways, not expected to bias the interpretation.              |
|                                                                         |                                                  |                               | The evidence (or evidentiary gaps) about potential harms relevant to each option is summarized in balanced ways, not expected to bias the interpretation.                 |

1  
2  
3  
4  
5  
6  
7  
8  
9  
10  
11  
12  
13  
14  
15  
16  
17  
18  
19  
20  
21  
22  
23  
24  
25  
26  
27  
28  
29  
30  
31  
32  
33  
34  
35  
36  
37  
38  
39  
40  
41  
42  
43  
44  
45  
46  
47

|          |                                   |            |                                                                                                           |
|----------|-----------------------------------|------------|-----------------------------------------------------------------------------------------------------------|
|          |                                   |            | The evidence (or evidentiary gaps) is summarized in ways that are easy to understand.                     |
|          |                                   |            | The certainty of the evidence is described in ways that are easy to understand.                           |
|          |                                   |            | The evidence summarization process is described in ways that are easy understand.                         |
|          |                                   |            | The funding used to summarize the evidence (and develop the PDA) is reported.                             |
|          |                                   | Manage COI | The conflicts of interest of people who summarize evidence are collected again before publishing the PDA. |
|          |                                   |            | Any change to the conflicts of interest of people who summarize evidence are reported.                    |
|          |                                   |            | Actions are taken to manage relevant conflicts of interest.                                               |
|          |                                   | Report     | The methods used to translate evidence to risk communication formats are reported.                        |
|          |                                   |            | The approach to readability of summarized evidence is reported.                                           |
|          |                                   |            | The summarization process is reported publicly.                                                           |
|          |                                   |            | The conflict of interest of people who summarize evidence are reported publicly.                          |
|          |                                   | Review     | The PDA is reviewed externally.                                                                           |
| Updating | PHASE IV: Post-publication update | Update     | The PDA content is updated when new evidence becomes available.                                           |

For peer review only

# BMJ Open

## Study protocol: A modified Delphi survey for the evidence summarization of patient decision aids

|                                 |                                                                                                                                                                                                                                                                                                                                                                                                                                                                                                                                                                                                                                                                                                                     |
|---------------------------------|---------------------------------------------------------------------------------------------------------------------------------------------------------------------------------------------------------------------------------------------------------------------------------------------------------------------------------------------------------------------------------------------------------------------------------------------------------------------------------------------------------------------------------------------------------------------------------------------------------------------------------------------------------------------------------------------------------------------|
| Journal:                        | <i>BMJ Open</i>                                                                                                                                                                                                                                                                                                                                                                                                                                                                                                                                                                                                                                                                                                     |
| Manuscript ID                   | bmjopen-2018-026701.R2                                                                                                                                                                                                                                                                                                                                                                                                                                                                                                                                                                                                                                                                                              |
| Article Type:                   | Protocol                                                                                                                                                                                                                                                                                                                                                                                                                                                                                                                                                                                                                                                                                                            |
| Date Submitted by the Author:   | 06-Feb-2019                                                                                                                                                                                                                                                                                                                                                                                                                                                                                                                                                                                                                                                                                                         |
| Complete List of Authors:       | Durand, Marie-Anne; The Dartmouth Institute for Health Policy & Clinical Practice,<br>Dannenberg, Michelle; Dartmouth College, The Dartmouth Institute for Health Policy and Clinical Practice<br>Saunders, Catherine; Dartmouth College, The Dartmouth Institute for Health Policy & Clinical Practice<br>Giguere, Anik; Universite Laval Faculte de medecine<br>Alper, Brian; EBSCO Health, DynaMed Plus; University of Missouri Columbia School of Medicine, Family and Community Medicine<br>Hoffmann, Tammy; Bond University,<br>Perestelo-Pérez, L; Evaluation Unit of the Canary Islands Health Service<br>Campbell, Stephen; Dartmouth College Geisel School of Medicine<br>Elwyn, Glyn; Dartmouth College, |
| <b>Primary Subject Heading</b>: | Communication                                                                                                                                                                                                                                                                                                                                                                                                                                                                                                                                                                                                                                                                                                       |
| Secondary Subject Heading:      | Evidence based practice                                                                                                                                                                                                                                                                                                                                                                                                                                                                                                                                                                                                                                                                                             |
| Keywords:                       | Decision Making, Delphi Technique, Patient Preference, Patient-Centered Care, Surveys and Questionnaires                                                                                                                                                                                                                                                                                                                                                                                                                                                                                                                                                                                                            |
|                                 |                                                                                                                                                                                                                                                                                                                                                                                                                                                                                                                                                                                                                                                                                                                     |

SCHOLARONE™  
Manuscripts

## Study protocol: A modified Delphi survey for the evidence summarization of patient decision aids

Running heading: Evidence summarization Delphi survey

### Authors:

Marie-Anne Durand<sup>1</sup>

Michelle D. Dannenberg<sup>2</sup>

Catherine H. Saunders<sup>3</sup>

Anik Giguère<sup>4</sup>

Brian S. Alper<sup>5</sup>

Tammy Hoffmann<sup>6</sup>

Lilisbeth Perestelo-Perez<sup>7</sup>

Stephen T. Campbell<sup>8</sup>

Glyn Elwyn<sup>9</sup>

- 1 Associate Professor  
The Preference Laboratory  
The Dartmouth Institute for Health Policy & Clinical Practice  
One Medical Center Drive, Lebanon, NH 03766, United States
- 2 Research Assistant/Research Coordinator  
The Preference Laboratory  
The Dartmouth Institute for Health Policy & Clinical Practice  
One Medical Center Drive, Lebanon, NH 03766, United States
- 3 Doctoral Student  
The Preference Laboratory  
The Dartmouth Institute for Health Policy & Clinical Practice  
One Medical Center Drive, Lebanon, NH 03766, United States
- 4 Associate Professor  
Department of Family Medicine  
Université Laval, C.A.  
2325 Rue de l'Université, Québec, QC G1V 0A6, Canada
- 5 Vice President of Innovations and EBM Development  
EBSCO Health Innovations, Department of Innovations and EBM Development  
10 Estes Street, Ipswich, MA 01938, United States
- 6 Professor of Clinical Epidemiology  
Centre for Research in Evidence-Based Practice (CREBP)  
Faculty of Health Sciences & Medicine  
Level 2, Building 5, Faculty of Health Sciences & Medicine, Bond University  
14 University Dr, Robina QLD 4226, Australia
- 7 Researcher  
Evaluation AND Planning Unit – Directorate of the Canary Islands Health Service  
Camino de Candelaria s/n. El Chorrillo  
38109

1  
2 El Rosario, Spain

3 8 Patient Partner

4 The Dartmouth Institute for Health Policy & Clinical Practice  
5 One Medical Center Drive, Lebanon, NH 03766, United States  
6

7  
8 9 Professor

9 The Preference Laboratory  
10 The Dartmouth Institute for Health Policy & Clinical Practice  
11 One Medical Center Drive, Lebanon, NH 03766, United States  
12  
13  
14  
15  
16

17 Correspondence to: Marie-Anne Durand:

18 Phone: 603-653-0851

19 Email: marie-anne.durand@dartmouth.edu

20 Address: The Preference Laboratory

21 The Dartmouth Institute for Health Policy & Clinical Practice  
22 Level 5, Williamson Translational Research Building  
23 One Medical Center Drive  
24 Lebanon, NH 03756  
25  
26  
27

28 Keywords

29 [Decision Making](#)

30 [Delphi Technique](#)

31 [Patient Preference](#)

32 [Patient-Centered Care](#)

33 [Surveys and Questionnaires](#)  
34  
35  
36  
37  
38  
39  
40  
41  
42  
43  
44  
45  
46  
47  
48  
49  
50  
51  
52  
53  
54  
55  
56  
57  
58  
59  
60

## ABSTRACT FOR PROTOCOL

### Introduction

Information included in a Patient Decision Aid (PDA) can significantly influence patients' decisions and is, therefore, expected to be evidence based and rigorously selected and summarized. Yet patient decision aid developers have not yet agreed on a standardized process for the selection and summarization of the supporting evidence. We intend to generate consensus on a process (and related steps and criteria) for selecting and summarizing evidence for patient decision aids using a modified Delphi survey.

### Methods and Analysis

We will develop an evidence summarization process specific to PDA development by using a consensus-based Delphi approach, surveying international experts and stakeholders with two to three rounds. To increase generalizability and acceptability, we will distribute the survey to the following stakeholder groups: patient decision aid developers, researchers with expertise in shared decision making, patient decision aid development and evidence summarization, members of the International Patient Decision Aid Standards group, policy makers with expertise in patient decision aid certification, and patient stakeholder groups. For each criterion, if at least 80% of survey participants rank the criterion as most important/least important, we will consider consensus achieved.

### Ethics and Dissemination

It is critical for patient decision aids to have accurate and trustworthy evidence-based information about the risks and benefits of health treatments and tests, as these decision aids help patients make important choices. We want to generate consensus on an approach for selecting and summarizing the evidence included in patient decision aids, which can be widely implemented by decision aid developers. Dartmouth College's Committee for the Protection of Human Subjects approved this protocol. We will publish our results in a peer-reviewed journal.

Words: 268

### Article Summary

- Gap: There is no standardized method for selecting and summarizing the evidence in patient decision aids.
- Solution: We are developing a process to ensure patient decision aids have the most up-to-date, trustworthy evidence available.
- Clinical implications: This will help patients and clinicians know they can trust the information in patient decision aids, so they can make the best decisions together.
- Strengths: Systematic involvement of patient stakeholders.
- Limitations: Limitations of online surveys include selection bias.

## INTRODUCTION

Patient Decision Aids (PDAs) are tools that help patients and their clinicians make preference-sensitive decisions together. They are typically defined as: “evidence-based tools designed to help patients make specific and deliberated choices among healthcare options. Patient decision aids supplement (rather than replace) clinicians' counselling about options”[1][2]. They promote patient engagement in medical decision making, collaboration between patients and their care team, increase knowledge and align patients' choices with their preferences [1]. Therefore, the information included in PDAs can significantly impact patients' decisions. For this reason, patients and clinicians expect the information in PDAs to be evidence based and rigorously selected and summarized.

The approach that PDA developers use to select and summarize the evidence in PDAs, however, appears inconsistent. A recent international cross sectional survey of 15 PDA developers confirms that they do not have an agreed-upon, standardized process to select and summarize evidence. They also do not always document the evidence selection and summarization process [3]. Most organizations reported using existing systematic reviews and clinical practice guidelines to select and summarize information for PDAs. Less than half reported using a standard, documented approach to guide the evidence selection and summarization. When the approach was documented, the documents offered varying levels of detail. Common evidence summarization steps identified were: tool-relevant question formation, search strategies, evidence appraisals, and updating policies. There was no standardized process across organizations to summarize evidence for PDAs. Although agreed-upon approaches and tested methods for evidence summarization exist in other areas, such as clinical practice guidelines, there is no agreed process (including steps and criteria within each step) for the selection and summarization of evidence for PDAs.

The International Patient Decision Aids Standards (IPDAS) collaboration developed criteria for assessing the quality of PDAs [4]. These criteria are also used by PDA producers to guide the development of the interventions. However, only six items of the IPDAS checklist cover the selection and summarization of evidence, and do not provide any guidance about recommended methods for the evidence selection and summarization of PDAs [4]. A 2013 review of the literature conducted by the IPDAS working group on the synthesis of scientific evidence highlighted the importance of rigorously selecting and summarizing evidence used to populate a patient decision aid. They did not provide clear practical guidance on how to conduct evidence summarization for the development of patient decision aids except recommending that developers apply the GRADE methodology [5]. Further, the IPDAS instrument and the IPDAS minimum standards do not offer additional information or guidance on the steps required to select and summarize evidence-based information for PDAs [6][7]. Other efforts to evaluate or certify the quality of PDAs have emerged [8], but none of those standards or certification bodies describe recommended methods and criteria that PDAs producers should follow when selecting and summarizing evidence for patient-facing interventions.

Evidence summarization in other medical contexts is increasingly standardized, such as the selection and summarization of evidence for clinical practice guidelines and systematic reviews. This process promotes transparency, rigor, and minimizes the risk of bias in the end product [2] [9][10][11][12][13][14][15][16][17]. The same level of scrutiny is justified when developing PDAs, as they may directly influence patient care and decision making. Tasks such as the selection and

1 identification of patient-relevant outcomes, analysis of patient concerns and priorities, description of  
2 the quality of evidence, and communication of uncertainty in ways that patients understand warrants  
3 the development of an agreed process and related steps and criteria that are specific to PDAs. For  
4 those reasons, it would not be appropriate to apply evidence summarization processes developed for  
5 clinical guidelines without integrating the evidence summarization steps and components that are  
6 specific to the development of interventions that target patients. The target group, scope and content  
7 differ significantly enough from clinical practice guidelines development, thus requiring a tailored  
8 evidence summarization process. Additionally, the IPDAS standards impose some prerequisites on the  
9 evidence summarization process on which the decision aid will be based. For example, IPDAS requires  
10 that the decision aid summarizes the evidence regarding all health options available to a patient facing  
11 a specific health problem, and that decision aids present positive and negative features of each option  
12 with an equal amount of details, among other specificities [18]. Efforts to develop an agreed evidence  
13 summarization process for PDAs should incorporate the substantial body of related evidence  
14 summarization guidance previously developed by other groups, and notably for clinical practice  
15 guidelines previously mentioned [11].

### 21 **Objective**

22 The purpose of the study is to generate consensus on a process (and related steps and criteria) for  
23 selecting and summarizing evidence for patient decision aids using a modified Delphi survey. This will  
24 in turn improve transparency, rigor and minimize the risk of bias of the evidence summarization  
25 processes leading to the development of patient decision aids.

## 28 **2 METHODS**

### 31 **Study Design and Procedures**

32 We will develop an evidence summarization process specific to PDA development by using a  
33 consensus-based Delphi approach previously used in the development of a quality criteria framework  
34 for PDAs [2] [19]. Consensus methods can harness the views of international experts on a wide range  
35 of information and questions in order to make decisions that are based on expert consensus [20]. We  
36 will conduct a multi-round modified Delphi survey (two to three rounds). Compared to the nominal  
37 group technique, it is the most practical and scalable method to obtain feedback from a large number  
38 of stakeholders in different geographic locations. During the multiple rounds of online questionnaires,  
39 relevant stakeholders will be consulted to provide feedback about the evolving set of evidence  
40 summarization steps and criteria. The anonymous responses from participants will be fed back to them  
41 in subsequent rounds. Depending on the level of consensus after two rounds (see Data Analysis  
42 section), we will determine whether to conduct a third survey round.

### 47 **Study Management**

48 To oversee the tasks of 1) generating an initial set of criteria for the Delphi process and 2) managing  
49 the Delphi survey distribution and analysis, we convened a steering group. This group will oversee the  
50 project and will make strategic decisions about the study design, data collection and analysis  
51 processes, as well as agree a final process and related set of steps and criteria. An invitation to join this  
52 group was posted on social media (Shared@Shared Decision Making Network Facebook group: 745  
53 members) on 30 June 2017. The post invited all Facebook group members to join an in-person meeting  
54 about evidence summarization during the International Shared Decision Making conference, held in  
55 Lyon, France, between July 2, and July 5, 2017. For those who were not able to join the meeting but  
56  
57  
58  
59



1 expressed an interest in evidence summarization of PDAs, a high-level summary was posted on  
2 Facebook. The steering group was convened in September 2017. The study steering group includes  
3 nine international experts in PDA development, evaluation and implementation, evidence  
4 summarization and clinical practice guidelines, and one patient representative. Six steering group  
5 members are based in the US, one in Canada, one in Australia and one in Spain Google drive and  
6 video-conferencing facilities will be used to facilitate the exchange and review of information and  
7 documents, virtual meetings, as well as real-time collaboration and version-control.  
8  
9

## 10 11 **Participants**

12 To maximize the generalizability and applicability of the criteria, we plan to invite participation in the  
13 survey from members of the following groups: 1) all known developers of PDAs who created or  
14 updated a tool within last five calendar years (using existing inventory), 2) all members of the of the  
15 IPDAS group, 3) the Shared Decision Making listserv; 4) the Society for Participatory Medicine listserv ;  
16 5) an overdiagnosis google group ; 6) the evidence-based healthcare listserv ; 7) the Society for Medical  
17 Decision Making ; the 8) the Society of Behavioral Medicine (Health Decision Making Interest Group) ,  
18 9) HTAi-ISG Patient Involvement listserv, 10) GRADE Working group, 11) the Guidelines International  
19 Network, 12) convenience sample of policy makers with interest and expertise in PDA certification; 13)  
20 the BMJ patient group; 14) the ProPublica Patient Safety Community. We have no other eligibility  
21 criteria (except for membership to one of the above listed groups).  
22  
23  
24  
25

26 For all participants, the survey invitation (Supplementary File 1) will provide a brief outline of the  
27 study, a link to the online survey (Supplementary File 2), and a brief participant information sheet as  
28 the first page of the survey. Consent will be inferred by participants' completion of the survey. The  
29 ethics application form and protocol were submitted to Dartmouth College's committee for the  
30 protection of human subjects on 27 April 2018. Approval was granted on 23 May 2018  
31 (STUDY00031042).  
32  
33

34 In order not to contaminate the Delphi survey results and express their views twice (in developing the  
35 original items and taking the surveys), the steering group members have unanimously decided not to  
36 complete the Delphi surveys.  
37  
38

## 39 **Patient and Public Involvement**

### 40 **Design**

41 Our patient partner, SC, was involved in the development of the Delphi survey and provided  
42 meaningful feedback on iterative drafts of the online questionnaire. SC is a core member of our study  
43 steering group and an author on this manuscript.  
44  
45  
46

### 47 **Participants**

48 We also plan to make a concerted effort to recruit patient participants. We will reach out to online  
49 patient groups, including the BMJ Patient group, the ProPublica Patient Safety Community (more than  
50 6,000 members). We will also engage a patient and family advisor group at Dartmouth-Hitchcock  
51 Medical Center.  
52  
53

### 54 **Analysis**

55 Our patient partner will be a critical part of our analysis team, and will be involved in all steering group  
56 meetings.  
57  
58  
59  
60

## Survey Development

The main output of the original Lyon evidence summarization meeting was the creation of a spreadsheet that detailed all evidence-summarization steps inherent to PDA development. The first draft of this spreadsheet, iteratively developed by the steering group members, included 18 criteria. Combining those 18 criteria with the eight existing standards for the summarization of clinical practice guidelines as outlined by the National Academy of Medicine (formerly IOM) & US Preventive Services Task Force Standards led to the creation of the first draft of the proposed process and steps. This draft was shared in a Google doc with all members of the steering group and iteratively refined and finalized. Three separate iterations of the process (phases, steps and criteria) were created, reviewed and discussed by the steering group members until no additional revisions were suggested. A final internal version of the criteria (n=48), categorized into four phases and 13 steps was finalized in April 2018 (see Supplementary File 3).

## Data Collection

### Round One Survey

The round one survey will include a brief information page and a summary of the process that led to the development of the phases, steps and criteria. Participants will be asked to provide their input on the phases, steps and criteria (including inclusion, wording, grouping, order and any other comments). Specifically, they will be asked to indicate using a four-point Likert scale (omit, possible, desirable, essential) whether each criterion included in the proposed process should be omitted or kept (and whether it is considered possible, desirable or essential). The criteria will be grouped into relevant phases and steps. For each phase and for each step, participants will be given the opportunity to provide rewording suggestions, suggest additional phases, steps or criteria, comment on the order of those elements or provide additional comments, or questions. Email addresses will be collected so participants can participate in further rounds. At the end of each round, we will confirm participants' interest to participate in the next round. Participants will also be asked to complete basic demographic questions. Each round of the survey will be open for three weeks, and two reminders will be sent.

### Round Two Survey (and round three, as necessary)

Round one participants will be invited to complete a second survey, in which feedback will be provided about the results of the first round (percentage of participants who thought a criterion should be included or excluded) and about the changes made based on the qualitative feedback. Participants will be invited to indicate whether to omit or include (omit, possible, desirable, essential) the items, including the new items proposed by participants in the first round, and to provide additional rewording suggestions, comments, or questions. As mentioned above, the survey will be open for three weeks, and two email reminders will be sent. Depending on the level of consensus (see data analysis section), a third round may be conducted. This will be determined by the steering group after round 2 data analysis is completed. We will use open debate and discussion followed by a democratic consensus.

## Data Analysis

Following round one, the ratings will be summarized using percentages and the views of all participants will be given equal weight. If at least 80% of participants rate the item in the lower two categories (omit, possible) or in the higher two categories (desirable, essential), we will consider

1  
2 consensus to be achieved and the item will be removed or retained, respectively. Items where ratings  
3 do not meet the consensus threshold and conflict with open text comments will be grouped together  
4 and explained to round 2 participants. They will be asked to re-rate those items taking the qualitative  
5 feedback into account. Following the first survey round, a consensus meeting involving the steering  
6 group will be held. The steering group will review and discuss the ratings and qualitative feedback  
7 received, including rewording suggestions per criterion, suggestions to add new phases, steps or  
8 criteria and more general comments or questions. The wording or order of the phases, steps or criteria  
9 will be revised if two or more respondents suggest it or if the steering group members agree that the  
10 phase, step or criterion would benefit from rewording, reordering or merging.  
11  
12

13  
14 Following the second survey round, a second consensus meeting will be held. Decisions on whether to  
15 conduct a third round and retain items in the scale will be made based on the ratings in the survey  
16 rounds and feedback/comments from participants. The ratings will be summarized using percentages  
17 and the views of all participants will be given equal weight. If at least 80% of participants rate the  
18 importance of the item in the lower two categories, or in the higher two categories, we will consider  
19 consensus to be achieved and the item will be removed or retained, respectively. If no consensus is  
20 achieved or the consensus ratings are contradicted by recurring open text comments, the steering  
21 group will decide whether or not to retain a criterion, basing this decision on qualitative feedback from  
22 the participants where possible, and the steering group's views. We have successfully used this  
23 approach before [21].  
24  
25

26  
27 Only complete surveys will be included in the analysis. We will report the amount of missing data in  
28 the manuscript reporting the results of the Delphi survey.  
29

### 30 **Data Management and Safety**

31  
32 Data to be collected include information about the participant's role as it relates to patient decision  
33 aids, general demographics, and their opinion of what to add/change/include in an evidence  
34 summarization process. We are careful to protect the identity of all study participants. We will store  
35 the data securely in accordance with standard human subject research protocols. All data will be  
36 retained for three years, per the Dartmouth College data retention policy (or for the period specified  
37 by journals in which arising manuscripts are published, if longer) and then destroyed securely.  
38  
39

### 40 **DISCUSSION**

41 Patient decision aids must have accurate and trustworthy evidence-based information about the risks  
42 and benefits of health treatments and tests, as these tools help patients make important healthcare  
43 choices. We want to generate consensus on an approach for selecting and summarizing the evidence  
44 included in patient decision aids, which we hope can be widely adopted by decision aid developers.  
45  
46

### 47 **STRENGTHS AND LIMITATIONS**

48  
49 A strength of this study is the systematic involvement of patients and relevant stakeholders in planning  
50 the modified Delphi survey. We plan to include a diverse sample of participant stakeholders including  
51 patients, researchers, patient decision aid developers and health policy makers. Limitations of online  
52 surveys always include the possibility of selection biases, meaning participants who opt to take the  
53 survey may be systematically different than the target population. In our case, the participants may be  
54 more engaged and more interested in the outcome of the Delphi survey. There is also a possibility that  
55 their views will be stronger than those who opted not to participate.  
56  
57  
58  
59

## CONCLUSION

Patients should be able to trust the information they receive from patient decision aids. Together with their clinicians, family and caregivers, they rely on these tools to make decisions that are aligned with their informed preferences. We believe standardizing a process for selecting and summarizing the evidence included in patient decision aids is therefore a worthwhile effort. Bringing all relevant stakeholders to the table - patients, researchers, patient decision aid developers, and healthcare policy makers - will ensure that the ultimate outcome is rigorous and rooted in consensus, to promote widespread adoption.

## ETHICS AND DISSEMINATION

Dartmouth College's Committee for the Protection of Human Subjects approved this protocol. We plan to publish our results in a peer-reviewed journal.

## FUNDING

We did not receive funding for this project.

## COMPETING INTERESTS

Glyn Elwyn and Marie-Anne Durand have developed the Option Grid patient decision aids, and EBSCO Information Services sells subscription access to Option Grid patient decision aids. They receive consulting income from EBSCO Health, and may receive royalties in the future. Glyn Elwyn and Marie-Anne Durand are consultant for ACCESS Community Health Network. Brian S. Alper is employed full-time by EBSCO Information Services which is a for-profit company that publishes patient decision aids. No other competing interests declared.

## AUTHORSHIP CONTRIBUTIONS

Marie-Anne Durand, Glyn Elwyn and Michelle D. Dannenberg planned and designed the study. Catherine H. Saunders, Anik Giguère, Brian S. Alper, Tammy Hoffmann, Lilisbeth Perestelo Perez and Stephen T. Campbell provided advice and guidance on the design. Marie-Anne Durand drafted the manuscript and all authors contributed to writing and approved the final draft of the manuscript.

## REFERENCES

- [1] D. Stacey, F. Légaré, K. Lewis, M.J. Barry, C.L. Bennett, K.B. Eden, M. Holmes-Rovner, H. Llewellyn-Thomas, A. Lyddiatt, R. Thomson, L. Trevena, F. Legare, N.F. Col, C.L. Bennett, M.J. Barry, K.B. Eden, M. Holmes-Rovner, H. Llewellyn-Thomas, A. Lyddiatt, R. Thomson, L. Trevena, J.H.C. Wu, F. Légaré, K. Lewis, M.J. Barry, C.L. Bennett, K.B. Eden, M. Holmes-Rovner, H. Llewellyn-Thomas, A. Lyddiatt, R. Thomson, L. Trevena, Decision aids for people facing health treatment or screening decisions, *Cochrane Database Syst. Rev.* 4 (2017) CD001431. doi:10.1002/14651858.CD001431.pub5.
- [2] G. Elwyn, A.M.A. O'Connor, D. Stacey, R. Volk, A.G.K.A.G. Edwards, A. Coulter, R. Thomas, A.L. Barratt, M. Barry, S.J. Bernstein, P.N. Butow, A. Clarke, V.A. Entwistle, D. Feldman-Stewart, M. Holmes-Rovner, A. Mulley, H.A. Llewellyn-Thomas, N. Moumjid, C. Ruland, K.R. Sepucha, A. Sykes, T. Whelan, R. Thomson, Developing a quality criteria framework for patient decision aids: online international Delphi consensus process, *BMJ.* 333 (2006) 417–423. doi:10.1136/bmj.38926.629329.AE.
- [3] M.D. Dannenberg, M.-A. Durand, V.M. Montori, C. Reilly, G. Elwyn, Existing evidence summarization methods cannot guarantee trustworthy patient decision aids., *J. Clin. Epidemiol.* 102 (2018) 69–77. doi:10.1016/j.jclinepi.2018.06.003.
- [4] G. Elwyn, A.M.A.M.A.M. O'Connor, C.L. Bennett, R.G.R.G.R.G. Newcombe, M. Politi, M.-A.M.M.-A. Durand, E. Drake, N. Joseph-Williams, S. Khangura, A. Saarimaki, S. Sivell, M. Stiel, S.J.S.J. Bernstein, N. Col, A. Coulter, K. Eden, M. Härter, M.H.M.H.M.H. Rovner, N. Moumjid, D. Stacey, R. Thomson, T. Whelan, T. van der Weijden, A.G.K.A. Edwards, O'Connor AM, Bennett C, Newcombe RG, Politi M, Durand MA, Drake E, Joseph-Williams N, Khangura S, Anton Saarimaki A, Stephanie Sivell S, Stiel M, Col N, Coulter A, Eden K, Holmes Rovner M, Moumjid N, Thomson R, Whelan T, van der Weijden T, A.G.K. Edward, A. Khangura, Assessing the quality of decision support technologies using the International Patient Decision Aid Standards instrument (IPDASi), *PLoS One.* 4 (2009) e4705. doi:10.1371/journal.pone.0004705.
- [5] V.M. Montori, A. LeBlanc, A. Buchholz, D.L. Stilwell, A. Tsapas, Basing information on comprehensive, critically appraised, and up-to-date syntheses of the scientific evidence: a quality dimension of the International Patient Decision Aid Standards., *BMC Med. Inform. Decis. Mak.* 13 Suppl 2 (2013) S5. doi:10.1186/1472-6947-13-S2-S5.
- [6] M.-A. Durand, J. Witt, N. Joseph-Williams, R.G. Newcombe, M.C. Politi, S. Sivell, G. Elwyn, Minimum standards for the certification of patient decision support interventions: Feasibility and application, *Patient Educ. Couns.* 98 (2015). doi:10.1016/j.pec.2014.12.009.
- [7] N. Joseph-Williams, R. Newcombe, M. Politi, M.-A. Durand, S. Sivell, D. Stacey, A. O'Connor, R.J. Volk, A. Edwards, C. Bennett, M. Pignone, R. Thomson, G. Elwyn, Toward Minimum Standards for Certifying Patient Decision Aids, *Med. Decis. Mak.* 34 (2014) 699–710. doi:10.1177/0272989X13501721.
- [8] A. WSHC, Patient decision aids certification 2018, (n.d.). <https://www.hca.wa.gov/about-hca/healthier-washington/patient-decision-aids-pdas>.
- [9] J.P.T. Higgins, S. Green, *Cochrane handbook for systematic reviews of interventions version 5.0. 2* [updated September 2009], The Cochrane Collaboration, York, 2009.
- [10] O.A. Schünemann H, Brożek J, Guyatt G, ed., *GRADE Handbook for Grading Quality of Evidence and Strength of Recommendations*, The GRADE Working Group, n.d. Available from [gdt.guidelinedevelopment.org/app/handbook/handbook.html](http://gdt.guidelinedevelopment.org/app/handbook/handbook.html) .

- 1  
2 [11] A. Qaseem, F. Forland, F. Macbeth, G. Ollenschlager, S. Phillips, P. van der Wees, Guidelines  
3 International Network: toward international standards for clinical practice guidelines., *Ann.*  
4 *Intern. Med.* 156 (2012) 525–531. doi:10.7326/0003-4819-156-7-201204030-00009.
- 5 [12] Standards for systematic reviews 2011, n.d.  
6 [http://www.nationalacademies.org/hmd/Reports/2011/Finding-What-Works-in-Health-Care-](http://www.nationalacademies.org/hmd/Reports/2011/Finding-What-Works-in-Health-Care-Standards-for-Systematic-Reviews/Standards.aspx)  
7 [Standards-for-Systematic-Reviews/Standards.aspx](http://www.nationalacademies.org/hmd/Reports/2011/Finding-What-Works-in-Health-Care-Standards-for-Systematic-Reviews/Standards.aspx).
- 8 [13] D. Moher, A. Liberati, J. Tetzlaff, D.G. Altman, Preferred reporting items for systematic reviews  
9 and meta-analyses: the PRISMA statement., *PLoS Med.* 6 (2009) e1000097.  
10 doi:10.1371/journal.pmed.1000097.
- 11 [14] M.C. Brouwers, M.E. Kho, G.P. Browman, J.S. Burgers, F. Cluzeau, G. Feder, B. Fervers, I.D.  
12 Graham, J. Grimshaw, S.E. Hanna, P. Littlejohns, J. Makarski, L. Zitzelsberger, The Global Rating  
13 Scale complements the AGREE II in advancing the quality of practice guidelines., *J. Clin.*  
14 *Epidemiol.* 65 (2012) 526–534. doi:10.1016/j.jclinepi.2011.10.008.
- 15 [15] M.C. Brouwers, M.E. Kho, G.P. Browman, J.S. Burgers, F. Cluzeau, G. Feder, B. Fervers, I.D.  
16 Graham, S.E. Hanna, J. Makarski, Development of the AGREE II, part 1: performance, usefulness  
17 and areas for improvement., *CMAJ.* 182 (2010) 1045–1052. doi:10.1503/cmaj.091714.
- 18 [16] M.C. Brouwers, M.E. Kho, G.P. Browman, J.S. Burgers, F. Cluzeau, G. Feder, B. Fervers, I.D.  
19 Graham, S.E. Hanna, J. Makarski, Development of the AGREE II, part 2: assessment of validity of  
20 items and tools to support application., *CMAJ.* 182 (2010) E472-8. doi:10.1503/cmaj.091716.
- 21 [17] F. Cluzeau, Conflicting recommendations. Let's not forget AGREE., *BMJ.* 338 (2009) b407.  
22 doi:10.1136/bmj.b407.
- 23 [18] M.A. Lawani, B. Valera, E. Fortier-Brochu, F. Legare, P.-H. Carmichael, L. Cote, P. Voyer, E.  
24 Kroger, H. Witteman, C. Rodriguez, A.M.C. Giguere, Five shared decision-making tools in 5  
25 months: use of rapid reviews to develop decision boxes for seniors living with dementia and  
26 their caregivers., *Syst. Rev.* 6 (2017) 56. doi:10.1186/s13643-017-0446-2.
- 27 [19] M.K. Murphy, N.A. Black, D.L. Lamping, C.M. McKee, C.F. Sanderson, J. Askham, T. Marteau,  
28 Consensus development methods, and their use in clinical guideline development., *Health*  
29 *Technol. Assess.* 2 (1998) i–iv, 1-88.
- 30 [20] J. Jones, D. Hunter, Jones J, Hunter D, J. J, H. D, Consensus methods for medical and health  
31 services research, *BMJ.* 311 (1995) 376–380. isi:A1995RN46900025.
- 32 [21] L.J.M. Oostendorp, M.-A. Durand, A. Lloyd, G. Elwyn, Measuring organisational readiness for  
33 patient engagement (MORE): an international online Delphi consensus study, *BMC Health Serv.*  
34 *Res.* 15 (2015) 61. doi:10.1186/s12913-015-0717-3.
- 35  
36  
37  
38  
39  
40  
41  
42  
43  
44  
45  
46  
47  
48  
49  
50  
51  
52  
53  
54  
55  
56  
57  
58  
59  
60

1  
2 **Supplementary File 1: Survey Invitation**

3  
4 SUBJ: Help us make more trustworthy patient materials: provide your feedback through a survey

5  
6 To the members of [group name/list-serv name] –

7  
8  
9 We are an international workgroup, led by Marie-Anne Durand and Glyn Elwyn at The Dartmouth Institute for Health Policy and  
10 Clinical Practice in Lebanon, N.H. We noticed a need for more clarity about how to select and summarize the evidence included  
11 in patient decision aids. Patient decision aids influence the decisions that patients make - so the need for trustworthy tools is  
12 important.  
13

14  
15 We wish to have your perspective, as an expert, patient, or other stakeholder.  
16

17  
18 **Please could you provide feedback via 2-3 surveys over the next few weeks?** Each survey should take less than 25  
19 minutes.  
20

21  
22 Please click the link below for more information and the first survey.  
23

24  
25 Many thanks,  
26

27  
28 The Evidence Summarization workgroup  
29  
30  
31  
32  
33  
34  
35  
36  
37  
38  
39  
40  
41  
42  
43  
44  
45  
46  
47

1  
2  
3  
4  
5  
6  
7  
8  
9  
10  
11  
12  
13  
14  
15  
16  
17  
18  
19  
20  
21  
22  
23  
24  
25  
26  
27  
28  
29  
30  
31  
32  
33  
34  
35  
36  
37  
38  
39  
40  
41  
42  
43  
44  
45  
46  
47

For peer review only



# Evidence Summarization Survey

## Information Sheet

### SURVEY INFORMATION

#### What is the study about?

We want to generate consensus on an approach for selecting and summarizing the evidence included in patient decision aids. Our workgroup developed a proposed set of Phases, Steps and Criteria, based on the methods used to develop trustworthy clinical practice guidelines. The purpose of this survey is to gain your perspective, as an expert, patient or other stakeholder.

#### What is involved?

If you participate, we'll ask you to complete two or three surveys. In the first survey, we'll ask for your perspective on the proposed Phases, Steps and Criteria. This will include rating importance, suggesting wording changes and suggesting additional items. In the second and third surveys, we'll ask similar questions except we'll also share some results from the first survey.

#### How long will it take?

Completing this survey should take less than 25 minutes.

#### Do I have to take part?

No. Taking part is voluntary.

#### Will I be compensated?

You won't be compensated. However, we hope you'll take part. Your contributions

1 will improve the process of developing reliable, high-quality decision aids for  
2 patients.

### 3 4 5 **Are there any risks?**

6 We don't anticipate any risks from participating in the study.  
7  
8  
9

### 10 **How will my privacy be protected?**

11 We won't name any individuals in any publications or presentations.  
12  
13  
14

### 15 **How can I contact you?**

16 If you have questions, please feel free to contact Michelle Dannenberg  
17 (Michelle.D.Dannenberg@dartmouth.edu), Research Coordinator, The Dartmouth  
18 Institute for Health Policy and Clinical Practice, Dartmouth College.  
19  
20  
21  
22  
23

24 If you would like to speak to the researchers leading this study, please contact Prof.  
25 Marie-Anne Durand (Marie-Anne.Durand@dartmouth.edu) or Prof. Glyn Elwyn  
26 (glynelwyn@gmail.com), The Dartmouth Institute for Health Policy and Clinical  
27 Practice, Dartmouth College.  
28  
29  
30  
31  
32

### 33 **What happens if I do not respond?**

34 You'll receive two automated email reminders to complete the survey.  
35  
36  
37  
38  
39  
40

41 Do you want to participate?

42  
43  Yes

44  
45  No  
46  
47  
48  
49  
50

## 51 **Background Questions**

## 52 **BACKGROUND QUESTIONS**

53  
54  
55  
56  
57  
58  
59  
60

1 Which of the following best describes you? Please select all that apply.  
2

- 3  Patient Decision Aid (PDA) developer
- 4  Researcher
- 5
- 6  International Patient Decision Aids Standards (IPDAS) collaboration member
- 7
- 8  Policy maker
- 9
- 10  Patient
- 11
- 12  Clinician, please specify specialty:
- 13
- 14  Other, please specify:
- 15
- 16
- 17
- 18
- 19
- 20
- 21
- 22

23 Which country do you live in?  
24

25   
26

27  
28  
29  
30 What is your gender?  
31

- 32  Male
- 33
- 34  Female
- 35
- 36  Other
- 37
- 38
- 39
- 40
- 41

42 What is your race/ethnicity? Please select all that apply.  
43

- 44  American Indian or Alaska Native
- 45
- 46  Asian
- 47
- 48  Black or African American
- 49
- 50  Native Hawaiian or Other Pacific Islander
- 51
- 52  Hispanic, Latino/a or Spanish Origin
- 53
- 54  White
- 55
- 56
- 57
- 58
- 59

Other, please specify:

## BACKGROUND QUESTIONS

We're requesting your email address so we can contact you for the next phase of this project. We will not share your email with anyone outside the study team, and we will not contact you about anything other than the study.

Please provide your email:

### Overall Proposed Phases, Steps and Criteria

## INFORMATION ON PROPOSED PROCESS

**Decision aids are tools that help patients make choices.** They provide information about the risks and benefits of health treatments and tests.

**Accurate and clear information is critical.** It's important for decision aids to have accurate and trustworthy information from research evidence about the risks and benefits of health treatments and tests.

**We're trying to make evidence summarization easier.** We're doing this by developing a process to guide decision aid developers in evidence summarization.

**We're building on the good work that's already been done.** This process includes the existing work of the International Patient Decision Aid Standards (IPDAS) collaboration.

**We sketched out a proposed process,** see Figure below. We are interested in your feedback on ALL elements of this, including the Phases, Steps and Criteria, as

For peer review only - <http://bmjopen.bmj.com/site/about/guidelines.xhtml>

well as the order and grouping.

**Here's how you can help.** In the questions that follow, we will ask for your perspective on **how important each criterion is to include in the proposed process.** We will also ask for feedback on the wording of all parts. Nothing is final. Everything is up for discussion, and we are looking forward to hearing from you.

**Below is a visual representation of the proposed process.** Review it carefully. There are four proposed phases, each with one to five proposed steps. Each step has a number of proposed Criteria. In the visual representation below, we show the first Criteria for each step. The tabs represent additional Criteria.

Feel free to [click here](#) to view the representation of the proposed Phases, Steps and Criteria in a separate window. You can click on the image to zoom. You can refer back to this image as you answer questions about the proposed process. Don't worry, if you accidentally close the window, there are links to the figure on each page of the survey.

# Proposed Phases, Steps and Criteria

For the Evidence Summarization of Patient Decision Aids

| Phase                                             | Step                                             | Criteria                                                                                                                                                         |
|---------------------------------------------------|--------------------------------------------------|------------------------------------------------------------------------------------------------------------------------------------------------------------------|
| <b>Phase 1</b><br>Define Process and Scope        | Define the Question                              | 1/3 The question is defined according to which population is relevant for this PDA.                                                                              |
|                                                   | Document Process and Policies                    | 1/4 The evidence summarization process is documented.                                                                                                            |
|                                                   | Manage COI                                       | 1/4 The conflicts of interest of people who summarize evidence are collected.                                                                                    |
|                                                   | Assemble Team                                    | 1/4 A multidisciplinary team is assembled.                                                                                                                       |
|                                                   | Define the Scope of Patient Decision Aid Content | 1/6 The population for whom the PDA is designed for is appropriate.                                                                                              |
| <b>Phase 2</b><br>Finding and Appraising Evidence | Search for Evidence                              | 1/6 There is a systematic search for evidence that relates to the options included in the PDA.                                                                   |
|                                                   | Select Evidence                                  | 1/4 There is a systematic process for selecting evidence for outcomes or patient concerns to include in the PDA.                                                 |
|                                                   | Appraise Evidence                                | 1/5 Evidence selected for inclusion in the PDA is critically appraised with a defined protocol.                                                                  |
| <b>Phase 3</b><br>Presenting Evidence             | Articulate the Information                       | 1/5 The evidence (or evidentiary gaps) about potential benefits relevant to each option is summarized in balanced ways, not expected to bias the interpretation. |
|                                                   | Manage COI                                       | 1/3 The conflicts of interest of people who summarize evidence are collected again before publishing the PDA.                                                    |
|                                                   | Report                                           | 1/4 The methods used to translate evidence to risk communication formats are reported.                                                                           |
|                                                   | Review                                           | 1/1 The PDA is reviewed externally.                                                                                                                              |
| <b>Phase 4</b><br>Updating                        | Update                                           | 1/1 The PDA content is updated when new evidence becomes available.                                                                                              |

## Phase 1

### PROPOSED PHASE 1

# Proposed Phases, Steps and Criteria

## For the Evidence Summarization of Patient Decision Aids



Feel free to [click here](#) to view a visualization of the proposed Phases, Steps and Criteria in a separate window while you complete the questions below.

Do you have any comments or suggestions on the Phase below? If so, please share them.

- Phase 1: Defining Process and Scope**

1  
2  
3  
4  
5  
6  
7  
8  
9  
10  
11  
12  
13  
14  
15  
16  
17  
18  
19  
20  
21  
22  
23  
24  
25  
26  
27  
28  
29  
30  
31  
32  
33  
34  
35  
36  
37  
38  
39  
40  
41  
42  
43  
44  
45  
46  
47  
48  
49  
50  
51  
52  
53  
54  
55  
56  
57  
58  
59  
60

Do you have any comments on the Steps below, including their wording or order? Or suggestions for additional steps? If so, please share them.

- **Step 1: Define the Question**
- **Step 2: Document Process and Policies**
- **Step 3: Manage COI**
- **Step 4: Assemble Team**
- **Step 5: Define the Scope of Patient Decision Aid Content**

## **PROPOSED PHASE 1 STEP 1**



# Proposed Phases, Steps and Criteria

## For the Evidence Summarization of Patient Decision Aids



Feel free to [click here](#) to view a visualization of the proposed Phases, Steps and Criteria in a separate window while you complete the questions below.

Do you have any comments or suggestions on the Step below? If so, please share them.

- **Step 1: Define the Question**

The proposed Criteria for this step are below. Please indicate whether each Criterium should be omitted, or whether it is a possible candidate for inclusion, a desirable candidate for inclusion or is essential for inclusion.

Omit Possible Desira

The question is defined according to which population is relevant for this PDA.

The question is defined according to which options are relevant for this PDA.

The question is defined according to which outcomes or patient concerns are relevant for this PDA.

Do you have any comments or suggestions on the Criteria above? If so, please share them.

Do you have any suggestions for additional Criteria to include in this Step? If so, please share them.

## PROPOSED PHASE 1 STEP 2

# Proposed Phases, Steps and Criteria

## For the Evidence Summarization of Patient Decision Aids

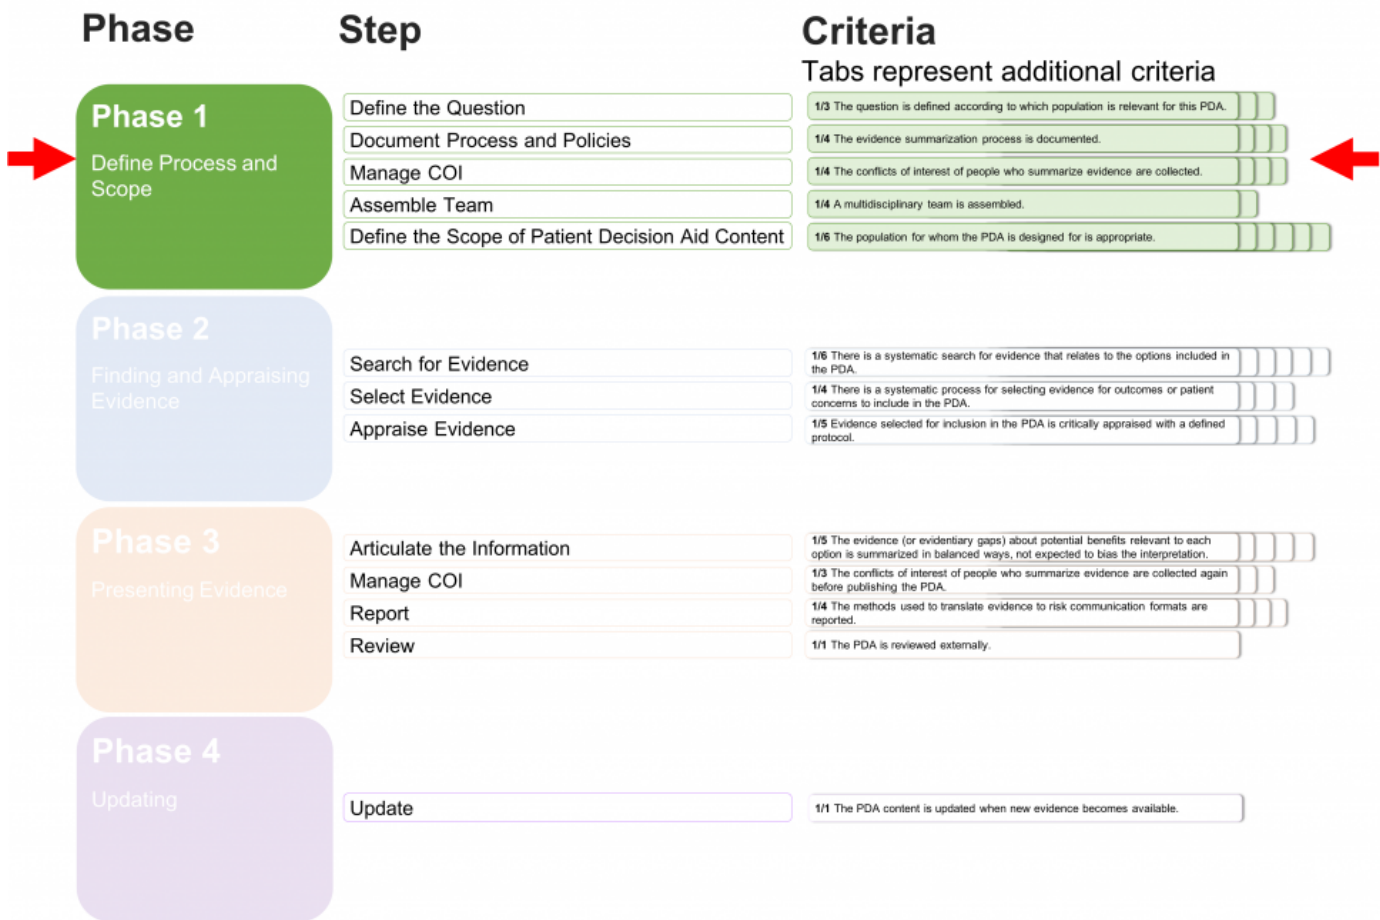

Feel free to [click here](#) to view a visualization of the proposed Phases, Steps and Criteria in a separate window while you complete the questions below.

Do you have any comments or suggestions on this Step? If so, please share them.

- **Step 2: Document Process and Policies**

1  
2  
3  
4  
5  
6  
7  
8  
9  
10  
11  
12  
13  
14  
15  
16  
17  
18  
19  
20  
21  
22  
23  
24  
25  
26  
27  
28  
29  
30  
31  
32  
33  
34  
35  
36  
37  
38  
39  
40  
41  
42  
43  
44  
45  
46  
47  
48  
49  
50  
51  
52  
53  
54  
55  
56  
57  
58  
59  
60

The proposed Criteria for this step are below. Please indicate whether each Criterium should be omitted, or whether it is a possible candidate for inclusion, a desirable candidate for inclusion or is essential for inclusion.

Omit Possible C

- The evidence summarization process is documented.
- The evidence summarization process minimizes bias.
- The evidence summarization process minimizes conflicts of interest.
- The conflict of interest policy applying to people who summarize evidence is documented.

Do you have any comments or suggestions on the Criteria above? If so, please share them.

Do you have any suggestions for additional Criteria to include in this Step? If so, please share them.

### PROPOSED PHASE 1 STEP 3

# Proposed Phases, Steps and Criteria

For the Evidence Summarization of Patient Decision Aids



Feel free to [click here](#) to view a visualization of the proposed Phases, Steps and Criteria in a separate window while you complete the questions below.

Do you have any comments or suggestions on this Step? If so, please share them.

- **Step 3: Manage COI**

The proposed Criteria for this step are below. Please indicate whether each Criterium should be omitted, or whether it is a possible candidate for inclusion, a desirable candidate for inclusion or is essential for inclusion.

Omit Possible E

The conflicts of interest of people who summarize evidence are collected.

Actions are taken to manage relevant conflicts of interest.

The actions taken on relevant conflicts of interest are documented.

Conflicts of interest are monitored over the course of PDA development.

Do you have any comments or suggestions on the Criteria above? If so, please share them.

Do you have any suggestions for additional Criteria to include in this Step? If so, please share them.

## PROPOSED PHASE 1 STEP 4

# Proposed Phases, Steps and Criteria

## For the Evidence Summarization of Patient Decision Aids



Feel free to [click here](#) to view a visualization of the proposed Phases, Steps and Criteria in a separate window while you complete the questions below.

Do you have any comments or suggestions on the Step below? If so, please share them.

- Step 4: Assemble Team**

1  
2  
3  
4  
5  
6  
7  
8  
9  
10  
11  
12  
13  
14  
15  
16  
17  
18  
19  
20  
21  
22  
23  
24  
25  
26  
27  
28  
29  
30  
31  
32  
33  
34  
35  
36  
37  
38  
39  
40  
41  
42  
43  
44  
45  
46  
47  
48  
49  
50  
51  
52  
53  
54  
55  
56  
57  
58  
59  
60

The proposed Criteria for this step are below. Please indicate whether each Criterium should be omitted, or whether it is a possible candidate for inclusion, a desirable candidate for inclusion or is essential for inclusion.

Omit Possible [

- A multidisciplinary team is assembled.
- The team comprises clinicians.
- The team comprises methodological experts.
- The team comprises patient or consumer representatives.

Do you have any comments or suggestions on the Criteria above? If so, please share them.

Do you have any suggestions for additional Criteria to include in this Step? If so, please share them.

## PROPOSED PHASE 1 STEP 5



# Proposed Phases, Steps and Criteria

## For the Evidence Summarization of Patient Decision Aids



Feel free to [click here](#) to view a visualization of the proposed Phases, Steps and Criteria in a separate window while you complete the questions below.

Do you have any comments or suggestions on the Step below? If so, please share them.

- **Step 5: Define the Scope of Patient Decision Aid Content**

The proposed Criteria for this step are below. Please indicate whether each Criterium should be omitted, or whether it is a possible candidate for inclusion, a desirable candidate for inclusion or is essential for inclusion.

Omit Possible E

The population for whom the PDA is designed for is appropriate.

There is a systematic process to reduce bias in the definition of the population for the PDA.

The options for inclusion in the PDA are appropriate for the intended population.

There is a systematic process to reduce bias in the definition of the options for the PDA.

The outcomes or patient concerns for inclusion in the PDA are appropriate for the intended population and options.

There is a systematic process to reduce bias in the definition of the outcomes or patient concerns for the PDA.

Do you have any comments or suggestions on the Criteria above? If so, please share them.

Do you have any suggestions for additional Criteria to include in this Step? If so, please share them.

## Phase 2

## PROPOSED PHASE 2

# Proposed Phases, Steps and Criteria

## For the Evidence Summarization of Patient Decision Aids

| Phase                                      | Step                                             | Criteria                                                                                                                                                         |
|--------------------------------------------|--------------------------------------------------|------------------------------------------------------------------------------------------------------------------------------------------------------------------|
| Phase 1<br>Define Process and Scope        | Define the Question                              | 1/3 The question is defined according to which population is relevant for this PDA.                                                                              |
|                                            | Document Process and Policies                    | 1/4 The evidence summarization process is documented.                                                                                                            |
|                                            | Manage COI                                       | 1/4 The conflicts of interest of people who summarize evidence are collected.                                                                                    |
|                                            | Assemble Team                                    | 1/4 A multidisciplinary team is assembled.                                                                                                                       |
|                                            | Define the Scope of Patient Decision Aid Content | 1/6 The population for whom the PDA is designed for is appropriate.                                                                                              |
| Phase 2<br>Finding and Appraising Evidence | Search for Evidence                              | 1/6 There is a systematic search for evidence that relates to the options included in the PDA.                                                                   |
|                                            | Select Evidence                                  | 1/4 There is a systematic process for selecting evidence for outcomes or patient concerns to include in the PDA.                                                 |
|                                            | Appraise Evidence                                | 1/5 Evidence selected for inclusion in the PDA is critically appraised with a defined protocol.                                                                  |
| Phase 3<br>Presenting Evidence             | Articulate the Information                       | 1/5 The evidence (or evidentiary gaps) about potential benefits relevant to each option is summarized in balanced ways, not expected to bias the interpretation. |
|                                            | Manage COI                                       | 1/3 The conflicts of interest of people who summarize evidence are collected again before publishing the PDA.                                                    |
|                                            | Report                                           | 1/4 The methods used to translate evidence to risk communication formats are reported.                                                                           |
|                                            | Review                                           | 1/1 The PDA is reviewed externally.                                                                                                                              |
| Phase 4<br>Updating                        | Update                                           | 1/1 The PDA content is updated when new evidence becomes available.                                                                                              |

Feel free to [click here](#) to view a visualization of the proposed Phases, Steps and Criteria in a separate window while you complete the questions below.

Do you have any comments or suggestions on the Phase below? If so, please share them.

- Phase 2: Finding & Appraising Evidence

Do you have any comments on the Steps below, including their wording or order? Or suggestions for additional steps? If so, please share them.

- Step 1: Search for Evidence
- Step 2: Select Evidence
- Step 3: Appraise Evidence

## PROPOSED PHASE 2 STEP 1



1 Feel free to [click here](#) to view a visualization of the proposed Phases, Steps and  
2 Criteria in a separate window while you complete the questions below.  
3  
4  
5

6  
7 Do you have any comments or suggestions on this Step? If so, please share them.  
8  
9

10 • **Step 1: Search for Evidence**  
11  
12  
13  
14  
15

16   
17

18  
19  
20 The proposed Criteria for this step are below. Please indicate whether each  
21 Criterium should be omitted, or whether it is a possible candidate for inclusion,  
22 a desirable candidate for inclusion or is essential for inclusion.  
23  
24  
25

|                                                                                                                                                                                                   | Omit                  | Possible              | Essential             |
|---------------------------------------------------------------------------------------------------------------------------------------------------------------------------------------------------|-----------------------|-----------------------|-----------------------|
| 26<br>27<br>28<br>29 There is a systematic search for evidence that relates to the options<br>30 included in the PDA.                                                                             | <input type="radio"/> | <input type="radio"/> | <input type="radio"/> |
| 31<br>32<br>33 There is a systematic search for evidence that relates to the<br>34 outcomes or patient concerns included in the PDA.                                                              | <input type="radio"/> | <input type="radio"/> | <input type="radio"/> |
| 35<br>36<br>37 If the PDA is customizable to individual patient factors, there is a<br>38 systematic search for evidence of how individual patient factors<br>39 influence the expected outcomes. | <input type="radio"/> | <input type="radio"/> | <input type="radio"/> |

40  
41  
42  
43 Do you have any comments or suggestions on the Criteria above? If so, please  
44 share them.  
45

46  
47   
48  
49

50  
51  
52 Do you have any suggestions for additional Criteria to include in this Step? If so,  
53 please share them.  
54

55  
56   
57  
58

## PROPOSED PHASE 2 STEP 2

# Proposed Phases, Steps and Criteria

## For the Evidence Summarization of Patient Decision Aids

| Phase                                             | Step                                             | Criteria                                                                                                                                                         |
|---------------------------------------------------|--------------------------------------------------|------------------------------------------------------------------------------------------------------------------------------------------------------------------|
| <b>Phase 1</b><br>Define Process and Scope        | Define the Question                              | 1/3 The question is defined according to which population is relevant for this PDA.                                                                              |
|                                                   | Document Process and Policies                    | 1/4 The evidence summarization process is documented.                                                                                                            |
|                                                   | Manage COI                                       | 1/4 The conflicts of interest of people who summarize evidence are collected.                                                                                    |
|                                                   | Assemble Team                                    | 1/4 A multidisciplinary team is assembled.                                                                                                                       |
|                                                   | Define the Scope of Patient Decision Aid Content | 1/6 The population for whom the PDA is designed for is appropriate.                                                                                              |
| <b>Phase 2</b><br>Finding and Appraising Evidence | Search for Evidence                              | 1/6 There is a systematic search for evidence that relates to the options included in the PDA.                                                                   |
|                                                   | Select Evidence                                  | 1/4 There is a systematic process for selecting evidence for outcomes or patient concerns to include in the PDA.                                                 |
|                                                   | Appraise Evidence                                | 1/5 Evidence selected for inclusion in the PDA is critically appraised with a defined protocol.                                                                  |
| <b>Phase 3</b><br>Presenting Evidence             | Articulate the Information                       | 1/5 The evidence (or evidentiary gaps) about potential benefits relevant to each option is summarized in balanced ways, not expected to bias the interpretation. |
|                                                   | Manage COI                                       | 1/3 The conflicts of interest of people who summarize evidence are collected again before publishing the PDA.                                                    |
|                                                   | Report                                           | 1/4 The methods used to translate evidence to risk communication formats are reported.                                                                           |
|                                                   | Review                                           | 1/1 The PDA is reviewed externally.                                                                                                                              |
| <b>Phase 4</b><br>Updating                        | Update                                           | 1/1 The PDA content is updated when new evidence becomes available.                                                                                              |

Feel free to [click here](#) to view a visualization of the proposed Phases, Steps and Criteria in a separate window while you complete the questions below.

Do you have any comments or suggestions on the Step below? If so, please share them.

- **Step 2: Select Evidence**

The proposed Criteria for this step are below. Please indicate whether each Criterium should be omitted, or whether it is a possible candidate for inclusion, a desirable candidate for inclusion or is essential for inclusion.

Omit Possible E

There is a systematic process for selecting evidence for outcomes or patient concerns to include in the PDA (where evidence is not available, can directly ask patients).

There is a systematic process for selecting evidence (or evidentiary gaps) about potential benefits relevant to each option.

There is a systematic process for selecting evidence (or evidentiary gaps) about potential harms relevant to each option.

If the PDA is customizable to individual patient factors, there is a systematic process for selecting relevant risk predictors to include in the PDA.

Do you have any comments or suggestions on the Criteria above? If so, please share them.

Do you have any suggestions for additional Criteria to include in this Step? If so, please share them.

### PROPOSED PHASE 2 STEP 3

# Proposed Phases, Steps and Criteria

For the Evidence Summarization of Patient Decision Aids

| Phase                                             | Step                                             | Criteria                                                                                                                                                         |
|---------------------------------------------------|--------------------------------------------------|------------------------------------------------------------------------------------------------------------------------------------------------------------------|
| <b>Phase 1</b><br>Define Process and Scope        | Define the Question                              | 1/3 The question is defined according to which population is relevant for this PDA.                                                                              |
|                                                   | Document Process and Policies                    | 1/4 The evidence summarization process is documented.                                                                                                            |
|                                                   | Manage COI                                       | 1/4 The conflicts of interest of people who summarize evidence are collected.                                                                                    |
|                                                   | Assemble Team                                    | 1/4 A multidisciplinary team is assembled.                                                                                                                       |
|                                                   | Define the Scope of Patient Decision Aid Content | 1/6 The population for whom the PDA is designed for is appropriate.                                                                                              |
| <b>Phase 2</b><br>Finding and Appraising Evidence | Search for Evidence                              | 1/6 There is a systematic search for evidence that relates to the options included in the PDA.                                                                   |
|                                                   | Select Evidence                                  | 1/4 There is a systematic process for selecting evidence for outcomes or patient concerns to include in the PDA.                                                 |
|                                                   | Appraise Evidence                                | 1/5 Evidence selected for inclusion in the PDA is critically appraised with a defined protocol.                                                                  |
| <b>Phase 3</b><br>Presenting Evidence             | Articulate the Information                       | 1/5 The evidence (or evidentiary gaps) about potential benefits relevant to each option is summarized in balanced ways, not expected to bias the interpretation. |
|                                                   | Manage COI                                       | 1/3 The conflicts of interest of people who summarize evidence are collected again before publishing the PDA.                                                    |
|                                                   | Report                                           | 1/4 The methods used to translate evidence to risk communication formats are reported.                                                                           |
|                                                   | Review                                           | 1/1 The PDA is reviewed externally.                                                                                                                              |
| <b>Phase 4</b><br>Updating                        | Update                                           | 1/1 The PDA content is updated when new evidence becomes available.                                                                                              |

Feel free to [click here](#) to view a visualization of the proposed Phases, Steps and Criteria in a separate window while you complete the questions below.

Do you have any comments or suggestions on the Step below? If so, please share them.

- Step 3: Appraise Evidence**



The proposed Criteria for this step are below. Please indicate whether each Criterium should be omitted, or whether it is a possible candidate for inclusion, a desirable candidate for inclusion or is essential for inclusion.

Omit Possible E

Evidence selected for inclusion in the PDA is critically appraised with a defined protocol (such as GRADE).

The protocol for critical appraisal of evidence accounts for risks of bias in study design.

The protocol for critical appraisal of evidence accounts for risks of bias in study analysis and reporting.

The protocol for critical appraisal of evidence accounts for assessment of certainty of evidence with attention to risk of bias, precision, directness, consistency, and publication bias.

The conflicts of interest of study authors related to selected evidence is appraised.

Do you have any comments or suggestions on the Criteria above? If so, please share them.

Do you have any suggestions for additional Criteria to include in this Step? If so, please share them.

### Phase 3

## PROPOSED PHASE 3

# Proposed Phases, Steps and Criteria

For the Evidence Summarization of Patient Decision Aids

## Phase

## Step

## Criteria

Tabs represent additional criteria

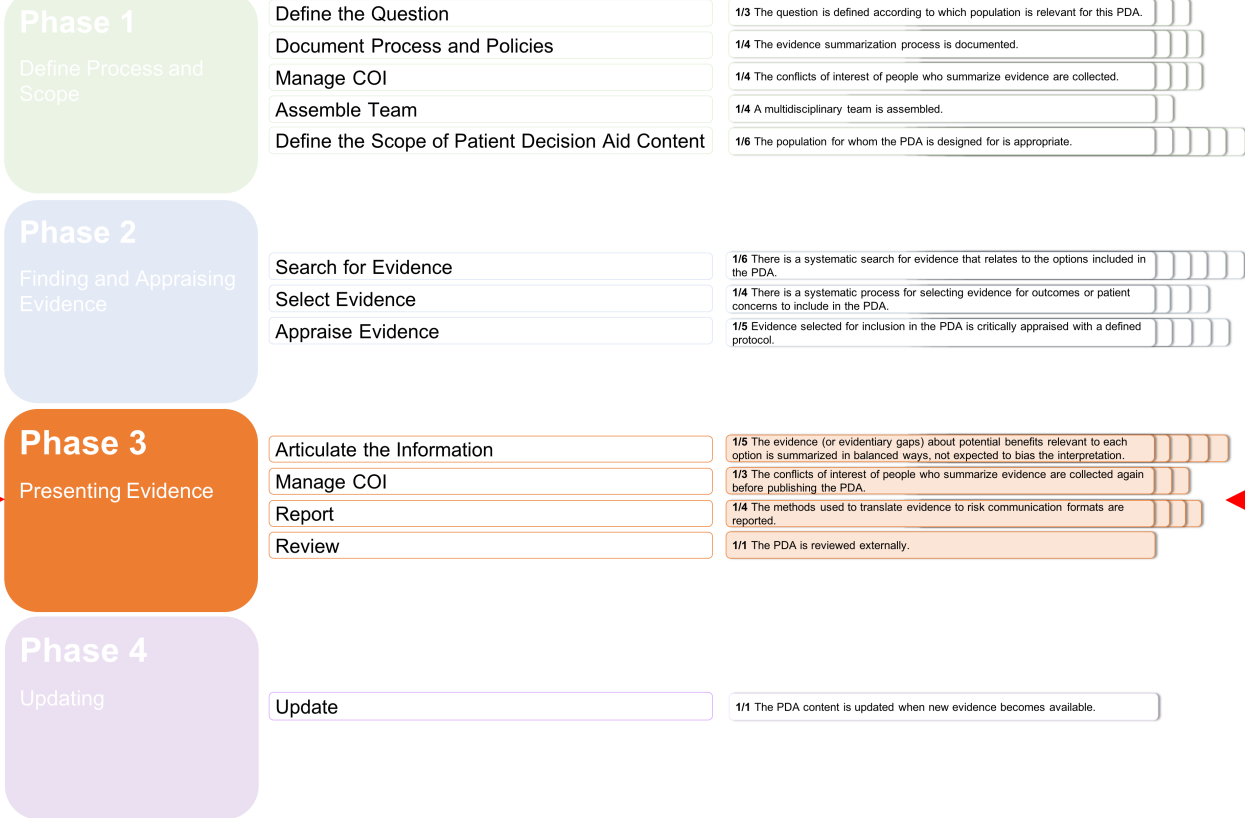

Feel free to [click here](#) to view a visualization of the proposed Phases, Steps and Criteria in a separate window while you complete the questions below.

Do you have any comments or suggestions on the Phase below? If so, please share them.

- **Phase 3: Presenting Evidence**

Do you have any comments on the Steps below, including their wording or order? Or do you have suggestions for additional steps? If so, please share them.

- Step 1: Articulate the Information
- Step 2: Manage COI
- Step 3: Report
- Step 4: Review

Empty text input box for comments.

### PROPOSED PHASE 3 STEP 1

## Proposed Phases, Steps and Criteria

For the Evidence Summarization of Patient Decision Aids

| Phase                                      | Step                                             | Criteria                                                                                                                                                         |
|--------------------------------------------|--------------------------------------------------|------------------------------------------------------------------------------------------------------------------------------------------------------------------|
| Phase 1<br>Define Process and Scope        | Define the Question                              | 1/3 The question is defined according to which population is relevant for this PDA.                                                                              |
|                                            | Document Process and Policies                    | 1/4 The evidence summarization process is documented.                                                                                                            |
|                                            | Manage COI                                       | 1/4 The conflicts of interest of people who summarize evidence are collected.                                                                                    |
|                                            | Assemble Team                                    | 1/4 A multidisciplinary team is assembled.                                                                                                                       |
|                                            | Define the Scope of Patient Decision Aid Content | 1/6 The population for whom the PDA is designed for is appropriate.                                                                                              |
| Phase 2<br>Finding and Appraising Evidence | Search for Evidence                              | 1/6 There is a systematic search for evidence that relates to the options included in the PDA.                                                                   |
|                                            | Select Evidence                                  | 1/4 There is a systematic process for selecting evidence for outcomes or patient concerns to include in the PDA.                                                 |
|                                            | Appraise Evidence                                | 1/5 Evidence selected for inclusion in the PDA is critically appraised with a defined protocol.                                                                  |
| Phase 3<br>Presenting Evidence             | Articulate the Information                       | 1/5 The evidence (or evidentiary gaps) about potential benefits relevant to each option is summarized in balanced ways, not expected to bias the interpretation. |
|                                            | Manage COI                                       | 1/3 The conflicts of interest of people who summarize evidence are collected again before publishing the PDA.                                                    |
|                                            | Report                                           | 1/4 The methods used to translate evidence to risk communication formats are reported.                                                                           |
|                                            | Review                                           | 1/1 The PDA is reviewed externally.                                                                                                                              |
| Phase 4<br>Updating                        | Update                                           | 1/1 The PDA content is updated when new evidence becomes available.                                                                                              |



1  
2  
3  
4  
5  
6  
7  
8  
9  
10  
11  
12  
13  
14  
15  
16  
17  
18  
19  
20  
21  
22  
23  
24  
25  
26  
27  
28  
29  
30  
31  
32  
33  
34  
35  
36  
37  
38  
39  
40  
41  
42  
43  
44  
45  
46  
47  
48  
49  
50  
51  
52  
53  
54  
55  
56  
57  
58  
59  
60

Feel free to [click here](#) to view a visualization of the proposed Phases, Steps and Criteria in a separate window while you complete the questions below.

Do you have any comments or suggestions on the Step below? If so, please share them.

• **Step 1: Articulate the Information**

The proposed Criteria for this step are below. Please indicate whether each Criterium should be omitted, or whether it is a possible candidate for inclusion, a desirable candidate for inclusion or is essential for inclusion.

|                                                                                                                                                              | Omit                  | Possible I            |
|--------------------------------------------------------------------------------------------------------------------------------------------------------------|-----------------------|-----------------------|
| The evidence (or evidentiary gaps) about potential benefits relevant to each option is summarized in balanced ways, not expected to bias the interpretation. | <input type="radio"/> | <input type="radio"/> |
| The evidence (or evidentiary gaps) about potential harms relevant to each option is summarized in balanced ways, not expected to bias the interpretation.    | <input type="radio"/> | <input type="radio"/> |
| The evidence (or evidentiary gaps) is summarized in ways that are easy to understand.                                                                        | <input type="radio"/> | <input type="radio"/> |
| The certainty of the evidence is described in ways that are easy to understand.                                                                              | <input type="radio"/> | <input type="radio"/> |
| The evidence summarization process is described in ways that are easy to understand.                                                                         | <input type="radio"/> | <input type="radio"/> |
| The funding used to summarize the evidence (and develop the PDA) is reported.                                                                                | <input type="radio"/> | <input type="radio"/> |

Do you have any comments or suggestions on the wording or order of any of the Criteria above? If so, please share them.

1  
2  
3  
4 Do you have any suggestions for additional Criteria to include in this Step? If so,  
5 please share them.  
6  
7

8  
9  
10  
11  
12  
13 **PROPOSED PHASE 3 STEP 2**  
14  
15

16  
17  
18  
19 **Proposed Phases, Steps and Criteria**

20 For the Evidence Summarization of Patient Decision Aids

21  
22  
23  
24 **Phase**

**Step**

**Criteria**

25 Tabs represent additional criteria

26 **Phase 1**

27 Define Process and  
28 Scope

- 29 Define the Question
- 30 Document Process and Policies
- 31 Manage COI
- 32 Assemble Team
- 33 Define the Scope of Patient Decision Aid Content

- 34 1/3 The question is defined according to which population is relevant for this PDA.
- 35 1/4 The evidence summarization process is documented.
- 36 1/4 The conflicts of interest of people who summarize evidence are collected.
- 37 1/4 A multidisciplinary team is assembled.
- 38 1/6 The population for whom the PDA is designed for is appropriate.

39 **Phase 2**

40 Finding and Appraising  
41 Evidence

- 42 Search for Evidence
- 43 Select Evidence
- 44 Appraise Evidence

- 45 1/6 There is a systematic search for evidence that relates to the options included in the PDA.
- 46 1/4 There is a systematic process for selecting evidence for outcomes or patient concerns to include in the PDA.
- 47 1/5 Evidence selected for inclusion in the PDA is critically appraised with a defined protocol.

48 **Phase 3**

49 Presenting Evidence

- 50 Articulate the Information
- 51 Manage COI
- 52 Report
- 53 Review

- 54 1/5 The evidence (or evidentiary gaps) about potential benefits relevant to each option is summarized in balanced ways, not expected to bias the interpretation.
- 55 1/3 The conflicts of interest of people who summarize evidence are collected again before publishing the PDA.
- 56 1/4 The methods used to translate evidence to risk communication formats are reported.
- 57 1/1 The PDA is reviewed externally.

58 **Phase 4**

59 Updating

- 60 Update

- 1/1 The PDA content is updated when new evidence becomes available.

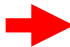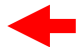

61  
62  
63  
64  
65  
66  
67  
68  
69  
70  
71  
72  
73  
74  
75  
76  
77  
78  
79  
80  
81  
82  
83  
84  
85  
86  
87  
88  
89  
90  
91  
92  
93  
94  
95  
96  
97  
98  
99  
100  
101  
102  
103  
104  
105  
106  
107  
108  
109  
110  
111  
112  
113  
114  
115  
116  
117  
118  
119  
120  
121  
122  
123  
124  
125  
126  
127  
128  
129  
130  
131  
132  
133  
134  
135  
136  
137  
138  
139  
140  
141  
142  
143  
144  
145  
146  
147  
148  
149  
150  
151  
152  
153  
154  
155  
156  
157  
158  
159  
160  
161  
162  
163  
164  
165  
166  
167  
168  
169  
170  
171  
172  
173  
174  
175  
176  
177  
178  
179  
180  
181  
182  
183  
184  
185  
186  
187  
188  
189  
190  
191  
192  
193  
194  
195  
196  
197  
198  
199  
200  
201  
202  
203  
204  
205  
206  
207  
208  
209  
210  
211  
212  
213  
214  
215  
216  
217  
218  
219  
220  
221  
222  
223  
224  
225  
226  
227  
228  
229  
230  
231  
232  
233  
234  
235  
236  
237  
238  
239  
240  
241  
242  
243  
244  
245  
246  
247  
248  
249  
250  
251  
252  
253  
254  
255  
256  
257  
258  
259  
260  
261  
262  
263  
264  
265  
266  
267  
268  
269  
270  
271  
272  
273  
274  
275  
276  
277  
278  
279  
280  
281  
282  
283  
284  
285  
286  
287  
288  
289  
290  
291  
292  
293  
294  
295  
296  
297  
298  
299  
300  
301  
302  
303  
304  
305  
306  
307  
308  
309  
310  
311  
312  
313  
314  
315  
316  
317  
318  
319  
320  
321  
322  
323  
324  
325  
326  
327  
328  
329  
330  
331  
332  
333  
334  
335  
336  
337  
338  
339  
340  
341  
342  
343  
344  
345  
346  
347  
348  
349  
350  
351  
352  
353  
354  
355  
356  
357  
358  
359  
360  
361  
362  
363  
364  
365  
366  
367  
368  
369  
370  
371  
372  
373  
374  
375  
376  
377  
378  
379  
380  
381  
382  
383  
384  
385  
386  
387  
388  
389  
390  
391  
392  
393  
394  
395  
396  
397  
398  
399  
400  
401  
402  
403  
404  
405  
406  
407  
408  
409  
410  
411  
412  
413  
414  
415  
416  
417  
418  
419  
420  
421  
422  
423  
424  
425  
426  
427  
428  
429  
430  
431  
432  
433  
434  
435  
436  
437  
438  
439  
440  
441  
442  
443  
444  
445  
446  
447  
448  
449  
450  
451  
452  
453  
454  
455  
456  
457  
458  
459  
460  
461  
462  
463  
464  
465  
466  
467  
468  
469  
470  
471  
472  
473  
474  
475  
476  
477  
478  
479  
480  
481  
482  
483  
484  
485  
486  
487  
488  
489  
490  
491  
492  
493  
494  
495  
496  
497  
498  
499  
500  
501  
502  
503  
504  
505  
506  
507  
508  
509  
510  
511  
512  
513  
514  
515  
516  
517  
518  
519  
520  
521  
522  
523  
524  
525  
526  
527  
528  
529  
530  
531  
532  
533  
534  
535  
536  
537  
538  
539  
540  
541  
542  
543  
544  
545  
546  
547  
548  
549  
550  
551  
552  
553  
554  
555  
556  
557  
558  
559  
560  
561  
562  
563  
564  
565  
566  
567  
568  
569  
570  
571  
572  
573  
574  
575  
576  
577  
578  
579  
580  
581  
582  
583  
584  
585  
586  
587  
588  
589  
590  
591  
592  
593  
594  
595  
596  
597  
598  
599  
600  
601  
602  
603  
604  
605  
606  
607  
608  
609  
610  
611  
612  
613  
614  
615  
616  
617  
618  
619  
620  
621  
622  
623  
624  
625  
626  
627  
628  
629  
630  
631  
632  
633  
634  
635  
636  
637  
638  
639  
640  
641  
642  
643  
644  
645  
646  
647  
648  
649  
650  
651  
652  
653  
654  
655  
656  
657  
658  
659  
660  
661  
662  
663  
664  
665  
666  
667  
668  
669  
670  
671  
672  
673  
674  
675  
676  
677  
678  
679  
680  
681  
682  
683  
684  
685  
686  
687  
688  
689  
690  
691  
692  
693  
694  
695  
696  
697  
698  
699  
700  
701  
702  
703  
704  
705  
706  
707  
708  
709  
710  
711  
712  
713  
714  
715  
716  
717  
718  
719  
720  
721  
722  
723  
724  
725  
726  
727  
728  
729  
730  
731  
732  
733  
734  
735  
736  
737  
738  
739  
740  
741  
742  
743  
744  
745  
746  
747  
748  
749  
750  
751  
752  
753  
754  
755  
756  
757  
758  
759  
760  
761  
762  
763  
764  
765  
766  
767  
768  
769  
770  
771  
772  
773  
774  
775  
776  
777  
778  
779  
780  
781  
782  
783  
784  
785  
786  
787  
788  
789  
790  
791  
792  
793  
794  
795  
796  
797  
798  
799  
800  
801  
802  
803  
804  
805  
806  
807  
808  
809  
810  
811  
812  
813  
814  
815  
816  
817  
818  
819  
820  
821  
822  
823  
824  
825  
826  
827  
828  
829  
830  
831  
832  
833  
834  
835  
836  
837  
838  
839  
840  
841  
842  
843  
844  
845  
846  
847  
848  
849  
850  
851  
852  
853  
854  
855  
856  
857  
858  
859  
860  
861  
862  
863  
864  
865  
866  
867  
868  
869  
870  
871  
872  
873  
874  
875  
876  
877  
878  
879  
880  
881  
882  
883  
884  
885  
886  
887  
888  
889  
890  
891  
892  
893  
894  
895  
896  
897  
898  
899  
900  
901  
902  
903  
904  
905  
906  
907  
908  
909  
910  
911  
912  
913  
914  
915  
916  
917  
918  
919  
920  
921  
922  
923  
924  
925  
926  
927  
928  
929  
930  
931  
932  
933  
934  
935  
936  
937  
938  
939  
940  
941  
942  
943  
944  
945  
946  
947  
948  
949  
950  
951  
952  
953  
954  
955  
956  
957  
958  
959  
960  
961  
962  
963  
964  
965  
966  
967  
968  
969  
970  
971  
972  
973  
974  
975  
976  
977  
978  
979  
980  
981  
982  
983  
984  
985  
986  
987  
988  
989  
990  
991  
992  
993  
994  
995  
996  
997  
998  
999  
1000

1  
2 Do you have any comments or suggestions on the Step below? If so, please share  
3 them.  
4  
5

6  
7 • **Step 2: Manage COI**  
8  
9

10  
11   
12

13  
14  
15 The proposed Criteria for this step are below. Please indicate whether each  
16 Criterium should be omitted, or whether it is a possible candidate for inclusion,  
17 a desirable candidate for inclusion or is essential for inclusion.  
18  
19

|                                                                                                                                            | Omit                  | Possible              | Essential             |
|--------------------------------------------------------------------------------------------------------------------------------------------|-----------------------|-----------------------|-----------------------|
| 20<br>21<br>22<br>23<br>24 The conflicts of interest of people who summarize evidence are<br>25 collected again before publishing the PDA. | <input type="radio"/> | <input type="radio"/> | <input type="radio"/> |
| 26<br>27 Any change to the conflicts of interest of people who summarize<br>28 evidence are reported.                                      | <input type="radio"/> | <input type="radio"/> | <input type="radio"/> |
| 29<br>30<br>31 Actions are taken to manage relevant conflicts of interest.                                                                 | <input type="radio"/> | <input type="radio"/> | <input type="radio"/> |

32  
33  
34  
35 Do you have any comments or suggestions on the wording or order of any of the  
36 Criteria above? If so, please share them.  
37

38  
39   
40  
41

42  
43  
44 Do you have any suggestions for additional Criteria to include in this Step? If so,  
45 please share them.  
46

47  
48   
49  
50

51  
52  
53 **PROPOSED PHASE 3 STEP 3**  
54  
55  
56  
57  
58  
59

# Proposed Phases, Steps and Criteria

## For the Evidence Summarization of Patient Decision Aids

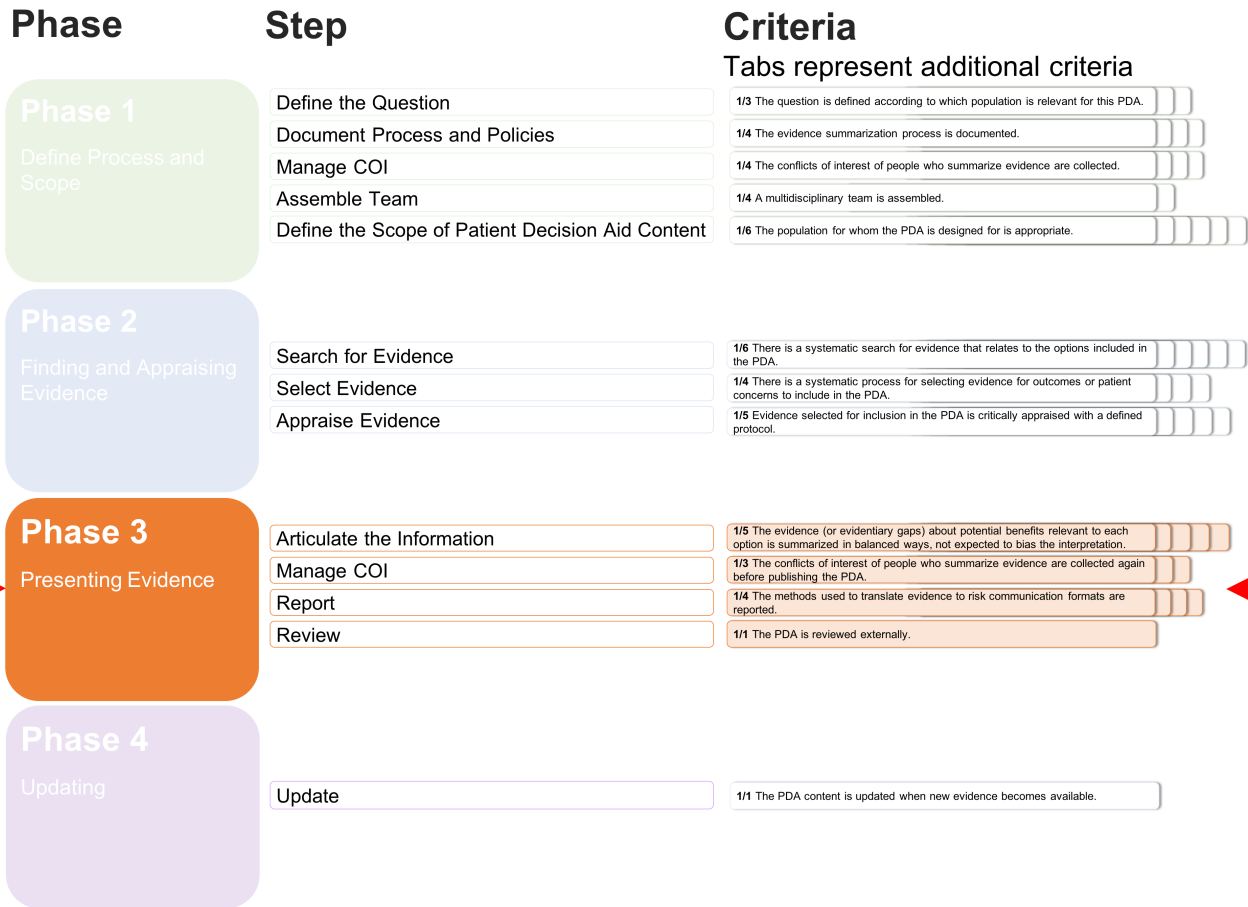

Feel free to [click here](#) to view a visualization of the proposed Phases, Steps and Criteria in a separate window while you complete the questions below.

Do you have any comments or suggestions on the Step below? If so, please share them.

- **Step 3: Report**

The proposed Criteria for this step are below. Please indicate whether each Criterium should be omitted, or whether it is a possible candidate for inclusion, a desirable candidate for inclusion or is essential for inclusion.

Omit Possible E

The methods used to translate evidence to risk communication formats are reported.

The approach to readability of summarized evidence is reported.

The summarization process is reported publicly.

The conflict of interest of people who summarize evidence are reported publicly.

Do you have any comments or suggestions on the wording or order of any of the Criteria above? If so, please share them.

Do you have any suggestions for additional Criteria to include in this Step? If so, please share them.

## PROPOSED PHASE 3 STEP 4



# Proposed Phases, Steps and Criteria

## For the Evidence Summarization of Patient Decision Aids



Feel free to [click here](#) to view a visualization of the proposed Phases, Steps and Criteria in a separate window while you complete the questions below.

Do you have any comments or suggestions on the Step below? If so, please share them.

- **Step 4: Review**

1 The proposed Criteria for this step are below. Please indicate whether each criterium  
2 should be omitted, or whether it is a possible candidate for inclusion,  
3 a desirable candidate for inclusion or is essential for inclusion.  
4  
5  
6

Omit F

7  
8 The PDA is reviewed externally.

9  
10  
11  
12  
13 Do you have any comments or suggestions on the wording or order of any of the  
14 Criteria above? If so, please share them.  
15

16  
17  
18

19  
20  
21  
22 Do you have any suggestions for additional Criteria to include in this Step? If so,  
23 please share them.  
24

25  
26  
27

28  
29  
30  
31 **Phase 4**

32  
33  
34  
35 **PROPOSED PHASE 4**

# Proposed Phases, Steps and Criteria

For the Evidence Summarization of Patient Decision Aids

| Phase                                             | Step                                             | Criteria                                                                                                                                                         |
|---------------------------------------------------|--------------------------------------------------|------------------------------------------------------------------------------------------------------------------------------------------------------------------|
| <b>Phase 1</b><br>Define Process and Scope        | Define the Question                              | 1/3 The question is defined according to which population is relevant for this PDA.                                                                              |
|                                                   | Document Process and Policies                    | 1/4 The evidence summarization process is documented.                                                                                                            |
|                                                   | Manage COI                                       | 1/4 The conflicts of interest of people who summarize evidence are collected.                                                                                    |
|                                                   | Assemble Team                                    | 1/4 A multidisciplinary team is assembled.                                                                                                                       |
|                                                   | Define the Scope of Patient Decision Aid Content | 1/6 The population for whom the PDA is designed for is appropriate.                                                                                              |
| <b>Phase 2</b><br>Finding and Appraising Evidence | Search for Evidence                              | 1/6 There is a systematic search for evidence that relates to the options included in the PDA.                                                                   |
|                                                   | Select Evidence                                  | 1/4 There is a systematic process for selecting evidence for outcomes or patient concerns to include in the PDA.                                                 |
|                                                   | Appraise Evidence                                | 1/5 Evidence selected for inclusion in the PDA is critically appraised with a defined protocol.                                                                  |
| <b>Phase 3</b><br>Presenting Evidence             | Articulate the Information                       | 1/5 The evidence (or evidentiary gaps) about potential benefits relevant to each option is summarized in balanced ways, not expected to bias the interpretation. |
|                                                   | Manage COI                                       | 1/3 The conflicts of interest of people who summarize evidence are collected again before publishing the PDA.                                                    |
|                                                   | Report                                           | 1/4 The methods used to translate evidence to risk communication formats are reported.                                                                           |
|                                                   | Review                                           | 1/1 The PDA is reviewed externally.                                                                                                                              |
| <b>Phase 4</b><br>Updating                        | Update                                           | 1/1 The PDA content is updated when new evidence becomes available.                                                                                              |

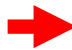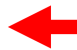

Feel free to [click here](#) to view a visualization of the proposed Phases, Steps and Criteria in a separate window while you complete the questions below.

Do you have any comments or suggestions on the Phase below? If so, please share them.

- Phase 4: Updating**

Do you have any comments or suggestions on the Step below. If so, please share them.

• Step 1: Update

## PROPOSED PHASE 4 STEP 1

# Proposed Phases, Steps and Criteria

## For the Evidence Summarization of Patient Decision Aids

| Phase                                      | Step                                             | Criteria                                                                                                                                                         |
|--------------------------------------------|--------------------------------------------------|------------------------------------------------------------------------------------------------------------------------------------------------------------------|
| Phase 1<br>Define Process and Scope        | Define the Question                              | 1/3 The question is defined according to which population is relevant for this PDA.                                                                              |
|                                            | Document Process and Policies                    | 1/4 The evidence summarization process is documented.                                                                                                            |
|                                            | Manage COI                                       | 1/4 The conflicts of interest of people who summarize evidence are collected.                                                                                    |
|                                            | Assemble Team                                    | 1/4 A multidisciplinary team is assembled.                                                                                                                       |
|                                            | Define the Scope of Patient Decision Aid Content | 1/6 The population for whom the PDA is designed for is appropriate.                                                                                              |
| Phase 2<br>Finding and Appraising Evidence | Search for Evidence                              | 1/6 There is a systematic search for evidence that relates to the options included in the PDA.                                                                   |
|                                            | Select Evidence                                  | 1/4 There is a systematic process for selecting evidence for outcomes or patient concerns to include in the PDA.                                                 |
|                                            | Appraise Evidence                                | 1/5 Evidence selected for inclusion in the PDA is critically appraised with a defined protocol.                                                                  |
| Phase 3<br>Presenting Evidence             | Articulate the Information                       | 1/5 The evidence (or evidentiary gaps) about potential benefits relevant to each option is summarized in balanced ways, not expected to bias the interpretation. |
|                                            | Manage COI                                       | 1/3 The conflicts of interest of people who summarize evidence are collected again before publishing the PDA.                                                    |
|                                            | Report                                           | 1/4 The methods used to translate evidence to risk communication formats are reported.                                                                           |
|                                            | Review                                           | 1/1 The PDA is reviewed externally.                                                                                                                              |
| Phase 4<br>Updating                        | Update                                           | 1/1 The PDA content is updated when new evidence becomes available.                                                                                              |



1  
2  
3  
4  
5  
6  
7  
8  
9  
10  
11  
12  
13  
14  
15  
16  
17  
18  
19  
20  
21  
22  
23  
24  
25  
26  
27  
28  
29  
30  
31  
32  
33  
34  
35  
36  
37  
38  
39  
40  
41  
42  
43  
44  
45  
46  
47  
48  
49  
50  
51  
52  
53  
54  
55  
56  
57  
58  
59  
60  
Feel free to [click here](#) to view a visualization of the proposed Phases, Steps and Criteria in a separate window while you complete the questions below.

Do you have any comments or suggestions on the Step below? If so, please share them.

- **Step 1: Update**

The proposed Criteria for this step are below. Please indicate whether each criterium should be omitted, or whether it is a possible candidate for inclusion, a desirable candidate for inclusion or is essential for inclusion.

Omit Possible I

The PDA content is updated when new evidence becomes available.

 

Do you have any comments or suggestions on the wording of the criterion above? If so, please share them.

Do you have any suggestions for additional criteria to include in this Step? If so, please share them.

Powered by Qualtrics

Supplementary File 3: Proposed Phases, Steps, and Criteria

| Existing standard<br>(from IOM & USPSTF) | Phase                                            | Step                                                                                                               | Criteria                                                                                           |
|------------------------------------------|--------------------------------------------------|--------------------------------------------------------------------------------------------------------------------|----------------------------------------------------------------------------------------------------|
| Establishing transparency                | Phase I: Define Process and Scope                | Define the question                                                                                                | The question is defined according to which population is relevant for this PDA.                    |
|                                          |                                                  |                                                                                                                    | The question is defined according to which options are relevant for this PDA.                      |
|                                          |                                                  |                                                                                                                    | The question is defined according to which outcomes or patient concerns are relevant for this PDA. |
|                                          |                                                  | Document process and policies                                                                                      | The evidence summarization process is documented.                                                  |
|                                          |                                                  |                                                                                                                    | The evidence summarization process minimizes bias.                                                 |
|                                          |                                                  |                                                                                                                    | The evidence summarization process minimizes conflicts of interest.                                |
|                                          |                                                  |                                                                                                                    | The conflict of interest policy applying to people who summarize evidence is documented.           |
| Management of conflict of interest       | Manage COI                                       | The conflicts of interest of people who summarize evidence are collected.                                          |                                                                                                    |
|                                          |                                                  | Actions are taken to manage relevant conflicts of interest.                                                        |                                                                                                    |
|                                          |                                                  | The actions taken on relevant conflicts of interest are documented.                                                |                                                                                                    |
|                                          |                                                  | Conflicts of interest are monitored over the course of PDA development.                                            |                                                                                                    |
| Guideline development group composition  | Assemble team                                    | A multidisciplinary team is assembled.                                                                             |                                                                                                    |
|                                          |                                                  | The team comprises clinicians.                                                                                     |                                                                                                    |
|                                          |                                                  | The team comprises methodological experts.                                                                         |                                                                                                    |
|                                          |                                                  | The team comprises patient or consumer representatives.                                                            |                                                                                                    |
|                                          | Define the scope of patient decision aid content | The population for whom the PDA is designed for is appropriate.                                                    |                                                                                                    |
|                                          |                                                  | There is a systematic process to reduce bias in the definition of the population for the PDA.                      |                                                                                                    |
|                                          |                                                  | The options for inclusion in the PDA are appropriate for the intended population.                                  |                                                                                                    |
|                                          |                                                  | There is a systematic process to reduce bias in the definition of the options for the PDA.                         |                                                                                                    |
|                                          |                                                  | The outcomes or patient concerns for inclusion in the PDA are appropriate for the intended population and options. |                                                                                                    |

|                                                                         |                                                  |                               |                                                                                                                                                                           |
|-------------------------------------------------------------------------|--------------------------------------------------|-------------------------------|---------------------------------------------------------------------------------------------------------------------------------------------------------------------------|
|                                                                         |                                                  |                               | There is a systematic process to reduce bias in the definition of the outcomes or patient concerns for the PDA.                                                           |
| Guideline and systematic review intersection                            | PHASE II:<br>Finding &<br>Appraising<br>Evidence | Search for<br>evidence        | There is a systematic search for evidence that relates to the options included in the PDA.                                                                                |
|                                                                         |                                                  |                               | There is a systematic search for evidence that relates to the outcomes or patient concerns included in the PDA.                                                           |
|                                                                         |                                                  |                               | If the PDA is customizable to individual patient factors, there is a systematic search for evidence of how individual patient factors influence the expected outcomes.    |
| Establishing evidence foundations and rating strength of recommendation |                                                  | Select<br>evidence            | There is a systematic process for selecting evidence for outcomes or patient concerns to include in the PDA (where evidence is not available, can directly ask patients). |
|                                                                         |                                                  |                               | There is a systematic process for selecting evidence (or evidentiary gaps) about potential benefits relevant to each option.                                              |
|                                                                         |                                                  |                               | There is a systematic process for selecting evidence (or evidentiary gaps) about potential harms relevant to each option.                                                 |
|                                                                         |                                                  |                               | If the PDA is customizable to individual patient factors, there is a systematic process for selecting relevant risk predictors to include in the PDA.                     |
|                                                                         |                                                  | Appraise<br>evidence          | Evidence selected for inclusion in the PDA is critically appraised with a defined protocol (such as GRADE).                                                               |
|                                                                         |                                                  |                               | The protocol for critical appraisal of evidence accounts for risks of bias in study design.                                                                               |
|                                                                         |                                                  |                               | The protocol for critical appraisal of evidence accounts for risks of bias in study analysis and reporting.                                                               |
| Articulation of information                                             | PHASE III:<br>Presenting<br>Evidence             | Articulate the<br>information | The evidence (or evidentiary gaps) about potential benefits relevant to each option is summarized in balanced ways, not expected to bias the interpretation.              |
|                                                                         |                                                  |                               | The evidence (or evidentiary gaps) about potential harms relevant to each option is summarized in balanced ways, not expected to bias the interpretation.                 |

1  
2  
3  
4  
5  
6  
7  
8  
9  
10  
11  
12  
13  
14  
15  
16  
17  
18  
19  
20  
21  
22  
23  
24  
25  
26  
27  
28  
29  
30  
31  
32  
33  
34  
35  
36  
37  
38  
39  
40  
41  
42  
43  
44  
45  
46  
47

|          |                                   |            |                                                                                                           |
|----------|-----------------------------------|------------|-----------------------------------------------------------------------------------------------------------|
|          |                                   |            | The evidence (or evidentiary gaps) is summarized in ways that are easy to understand.                     |
|          |                                   |            | The certainty of the evidence is described in ways that are easy to understand.                           |
|          |                                   |            | The evidence summarization process is described in ways that are easy understand.                         |
|          |                                   |            | The funding used to summarize the evidence (and develop the PDA) is reported.                             |
|          |                                   | Manage COI | The conflicts of interest of people who summarize evidence are collected again before publishing the PDA. |
|          |                                   |            | Any change to the conflicts of interest of people who summarize evidence are reported.                    |
|          |                                   |            | Actions are taken to manage relevant conflicts of interest.                                               |
|          |                                   | Report     | The methods used to translate evidence to risk communication formats are reported.                        |
|          |                                   |            | The approach to readability of summarized evidence is reported.                                           |
|          |                                   |            | The summarization process is reported publicly.                                                           |
|          |                                   |            | The conflict of interest of people who summarize evidence are reported publicly.                          |
|          |                                   | Review     | The PDA is reviewed externally.                                                                           |
| Updating | PHASE IV: Post-publication update | Update     | The PDA content is updated when new evidence becomes available.                                           |

For peer review only
