# Supplementary material for: Modified Delphi survey for the evidence summarisation of patient decision aids: Study protocol
Source: PubMed Central journal article supplement — BMJ Open. 2019 Mar 23;9(3):e026701. doi: 10.1136/bmjopen-2018-026701 (PMC6475258; doi:10.1136/bmjopen-2018-026701), 2019-03-23
Supplement: bmjopen-2018-026701supp001.pdf [file bmjopen-2018-026701supp001.pdf]

**Supplementary File 1: Survey Invitation**

SUBJ: Help us make more trustworthy patient materials: provide your feedback through a survey

To the members of [group name/list-serv name] –

We are an international workgroup, led by Marie-Anne Durand and Glyn Elwyn at The Dartmouth Institute for Health Policy and Clinical Practice in Lebanon, N.H. We noticed a need for more clarity about how to select and summarize the evidence included in patient decision aids. Patient decision aids influence the decisions that patients make - so the need for trustworthy tools is important.

We wish to have your perspective, as an expert, patient, or other stakeholder.

**Please could you provide feedback via 2-3 surveys over the next few weeks?** Each survey should take less than 25 minutes.

Please click the link below for more information and the first survey.

Many thanks,

The Evidence Summarization workgroup
