# Supplementary material for: Modified Delphi survey for the evidence summarisation of patient decision aids: Study protocol
Source: PubMed Central journal article supplement — BMJ Open. 2019 Mar 23;9(3):e026701. doi: 10.1136/bmjopen-2018-026701 (PMC6475258; doi:10.1136/bmjopen-2018-026701), 2019-03-23
Supplement: bmjopen-2018-026701supp003.pdf [file bmjopen-2018-026701supp003.pdf]

**Supplementary File 3: Proposed Phases, Steps, and Criteria**

| Existing standard<br>(from IOM & USPSTF)                                | Phase                                            | Step                                                                                                               | Criteria                                                                                           |                                                                           |
|-------------------------------------------------------------------------|--------------------------------------------------|--------------------------------------------------------------------------------------------------------------------|----------------------------------------------------------------------------------------------------|---------------------------------------------------------------------------|
| Establishing transparency                                               | Phase I: Define Process and Scope                | Define the question                                                                                                | The question is defined according to which population is relevant for this PDA.                    |                                                                           |
|                                                                         |                                                  |                                                                                                                    | The question is defined according to which options are relevant for this PDA.                      |                                                                           |
|                                                                         |                                                  |                                                                                                                    | The question is defined according to which outcomes or patient concerns are relevant for this PDA. |                                                                           |
|                                                                         |                                                  | Document process and policies                                                                                      | The evidence summarization process is documented.                                                  |                                                                           |
|                                                                         |                                                  |                                                                                                                    | The evidence summarization process minimizes bias.                                                 |                                                                           |
|                                                                         |                                                  |                                                                                                                    | The evidence summarization process minimizes conflicts of interest.                                |                                                                           |
|                                                                         |                                                  |                                                                                                                    | The conflict of interest policy applying to people who summarize evidence is documented.           |                                                                           |
|                                                                         |                                                  | Management of conflict of interest                                                                                 | Manage COI                                                                                         | The conflicts of interest of people who summarize evidence are collected. |
|                                                                         |                                                  |                                                                                                                    |                                                                                                    | Actions are taken to manage relevant conflicts of interest.               |
| The actions taken on relevant conflicts of interest are documented.     |                                                  |                                                                                                                    |                                                                                                    |                                                                           |
| Conflicts of interest are monitored over the course of PDA development. |                                                  |                                                                                                                    |                                                                                                    |                                                                           |
| Guideline development group composition                                 | Assemble team                                    | A multidisciplinary team is assembled.                                                                             |                                                                                                    |                                                                           |
|                                                                         |                                                  | The team comprises clinicians.                                                                                     |                                                                                                    |                                                                           |
|                                                                         |                                                  | The team comprises methodological experts.                                                                         |                                                                                                    |                                                                           |
|                                                                         |                                                  | The team comprises patient or consumer representatives.                                                            |                                                                                                    |                                                                           |
|                                                                         | Define the scope of patient decision aid content | The population for whom the PDA is designed for is appropriate.                                                    |                                                                                                    |                                                                           |
|                                                                         |                                                  | There is a systematic process to reduce bias in the definition of the population for the PDA.                      |                                                                                                    |                                                                           |
|                                                                         |                                                  | The options for inclusion in the PDA are appropriate for the intended population.                                  |                                                                                                    |                                                                           |
|                                                                         |                                                  | There is a systematic process to reduce bias in the definition of the options for the PDA.                         |                                                                                                    |                                                                           |
|                                                                         |                                                  | The outcomes or patient concerns for inclusion in the PDA are appropriate for the intended population and options. |                                                                                                    |                                                                           |

|                                                                         |                                         |                            |                                                                                                                                                                                            |
|-------------------------------------------------------------------------|-----------------------------------------|----------------------------|--------------------------------------------------------------------------------------------------------------------------------------------------------------------------------------------|
|                                                                         |                                         |                            | There is a systematic process to reduce bias in the definition of the outcomes or patient concerns for the PDA.                                                                            |
| Guideline and systematic review intersection                            | PHASE II: Finding & Appraising Evidence | Search for evidence        | There is a systematic search for evidence that relates to the options included in the PDA.                                                                                                 |
|                                                                         |                                         |                            | There is a systematic search for evidence that relates to the outcomes or patient concerns included in the PDA.                                                                            |
|                                                                         |                                         |                            | If the PDA is customizable to individual patient factors, there is a systematic search for evidence of how individual patient factors influence the expected outcomes.                     |
| Establishing evidence foundations and rating strength of recommendation | PHASE II: Finding & Appraising Evidence | Select evidence            | There is a systematic process for selecting evidence for outcomes or patient concerns to include in the PDA (where evidence is not available, can directly ask patients).                  |
|                                                                         |                                         |                            | There is a systematic process for selecting evidence (or evidentiary gaps) about potential benefits relevant to each option.                                                               |
|                                                                         |                                         |                            | There is a systematic process for selecting evidence (or evidentiary gaps) about potential harms relevant to each option.                                                                  |
|                                                                         |                                         |                            | If the PDA is customizable to individual patient factors, there is a systematic process for selecting relevant risk predictors to include in the PDA.                                      |
|                                                                         |                                         | Appraise evidence          | Evidence selected for inclusion in the PDA is critically appraised with a defined protocol (such as GRADE).                                                                                |
|                                                                         |                                         |                            | The protocol for critical appraisal of evidence accounts for risks of bias in study design.                                                                                                |
|                                                                         |                                         |                            | The protocol for critical appraisal of evidence accounts for risks of bias in study analysis and reporting.                                                                                |
|                                                                         |                                         |                            | The protocol for critical appraisal of evidence accounts for assessment of certainty of evidence with attention to risk of bias, precision, directness, consistency, and publication bias. |
|                                                                         |                                         |                            | The conflicts of interest of study authors related to selected evidence is appraised.                                                                                                      |
|                                                                         |                                         |                            |                                                                                                                                                                                            |
| Articulation of information                                             | PHASE III: Presenting Evidence          | Articulate the information | The evidence (or evidentiary gaps) about potential benefits relevant to each option is summarized in balanced ways, not expected to bias the interpretation.                               |
|                                                                         |                                         |                            | The evidence (or evidentiary gaps) about potential harms relevant to each option is summarized in balanced ways, not expected to bias the interpretation.                                  |

|          |                                   |            |                                                                                                           |
|----------|-----------------------------------|------------|-----------------------------------------------------------------------------------------------------------|
|          |                                   |            | The evidence (or evidentiary gaps) is summarized in ways that are easy to understand.                     |
|          |                                   |            | The certainty of the evidence is described in ways that are easy to understand.                           |
|          |                                   |            | The evidence summarization process is described in ways that are easy understand.                         |
|          |                                   |            | The funding used to summarize the evidence (and develop the PDA) is reported.                             |
|          |                                   | Manage COI | The conflicts of interest of people who summarize evidence are collected again before publishing the PDA. |
|          |                                   |            | Any change to the conflicts of interest of people who summarize evidence are reported.                    |
|          |                                   |            | Actions are taken to manage relevant conflicts of interest.                                               |
|          |                                   | Report     | The methods used to translate evidence to risk communication formats are reported.                        |
|          |                                   |            | The approach to readability of summarized evidence is reported.                                           |
|          |                                   |            | The summarization process is reported publicly.                                                           |
|          |                                   |            | The conflict of interest of people who summarize evidence are reported publicly.                          |
|          |                                   | Review     | The PDA is reviewed externally.                                                                           |
| Updating | PHASE IV: Post-publication update | Update     | The PDA content is updated when new evidence becomes available.                                           |
